# Supplementary material for: One-pot synthesis of functionalized 4-hydroxy-3-thiomethylcoumarins: detection and discrimination of Co2+ and Ni2+ ions
Source: Royal Society of Chemistry journal article supplement (doi:10.1039/c5ra09152g), 2015-01-01

## Supporting Information

### One-pot synthesis of functionalized 4-hydroxy-3-thiomethylcoumarins: Detection and discrimination of Co<sup>2+</sup> and Ni<sup>2+</sup> ions

Ajaz A. Dar,<sup>a</sup> Sameer Hussain,<sup>a</sup> Debasish Dutta,<sup>a</sup> Parameswar K. Iyer<sup>\*a</sup> and Abu T. Khan<sup>\*a,b</sup>

<sup>a</sup>Department of Chemistry, Indian Institute of Technology Guwahati, Guwahati 781 039, India

<sup>b</sup>Aliah University, IIA/27, New Town, Kolkata-700 156, West Bengal, India

\*E-mail: atk@iitg.ernet.in; pki@iitg.ernet.in

|                                                                              |       |
|------------------------------------------------------------------------------|-------|
| • Title page                                                                 | 1     |
| • Experimental                                                               | 2-3   |
| • Packing diagrams and Stern Volmer plots                                    | 3-5   |
| • Determination of Detection Limit                                           | 6     |
| • ESI-Mass spectra of Co-complex and Ni-complex                              | 7     |
| • Determination of Binding Constant                                          | 8     |
| • X-ray crystallographic data of 28a, Co-complex and Ni-complex              | 9-12  |
| • Spectral data for all Compounds                                            | 13-24 |
| • Copies of <sup>1</sup> H NMR, <sup>13</sup> C NMR, MS spectra of Compounds | 24-69 |

## Experimental

All the reagents were of analytical reagent (AR) grade and were used as purchased without further purification. Melting points were recorded in an open capillary tube and are uncorrected. Fourier transform infrared (FT-IR) spectra were recorded as neat liquid or KBr pellets.  $^1\text{H}$  and  $^{13}\text{C}$  NMR spectra were recorded on Varian 400 MHz NMR spectrometer TMS as internal reference; chemical shifts ( $\delta$  scale) are reported in parts per million (ppm).  $^1\text{H}$  NMR Spectra are reported in the order: multiplicity, coupling constant (J value) in hertz (Hz) and no. of protons; signals were characterized as s (singlet), d (doublet), dd (doublet of doublets), t (triplet), m (multiplet). Mass spectra were recorded using ESI/APCI mode (Q-TOF type Mass Analyzer). Column chromatographic separations were performed using silica gel (60-120 mesh). Metal salts were used as their perchlorates. HPLC grade DMSO and Milli-Q water was used in all the experiments. UV-visible absorption spectra were obtained using a Perkin-Elmer Lambda 25 spectrophotometer. Fluorescence emission spectra were recorded on Horiba Fluoromax-4 spectrofluorometer using 10 mm path length quartz cuvette and a slit width of 3 nm at room temperature. The X-ray crystal structures were determined using a single XRD diffractometer. Complete crystallographic data of **28a**, **Co-Complex** and **Ni-Complex** for the structural analysis have been deposited with the Cambridge Crystallographic Data Centre, CCDC No. 1038726, 1038805 and 1038804 respectively. Copies of this information may be obtained free of charge from the Director, Cambridge Crystallographic Data Centre, 12 Union Road, Cambridge CB2 1EZ, UK, (fax: +44-1223-336033, e-mail: [deposit@ccdc.cam.ac.uk](mailto:deposit@ccdc.cam.ac.uk) or via: [www.ccdc.cam.ac.uk](http://www.ccdc.cam.ac.uk)).

### General procedure for the preparation 4-hydroxy-3-thiomethylcoumarins

In 10 mL round bottomed flask, a mixture of aldehyde (1 mmol) and L-proline (0.1 mmol) was dissolved in 3 mL of ethanol and stirred at room temperature. After 10 min of stirring, 4-hydroxycoumarin (1 mmol) and thiol (1.2 mmol) were added either directly if it is a solid or drop-wise through a syringe, in quick succession. The solid products were precipitated out during the reaction after appropriate reaction time. Finally, the solid products were filtered off through a Büchner funnel, thoroughly washed with the mixture of ethanol and hexane (2:8) to remove unreacted starting material and recrystallized in 9:1 mixture of ethanol and chloroform. The following work up procedure was followed for the products in case the solid precipitate did not come out during the reaction time. After completion of reaction as checked by TLC, ethanol was removed under reduced pressure via a rotary evaporator and the crude

residue was extracted with dichloromethane (2 × 15 mL). The organic layer was washed with water, brine solution (2 x 5 mL) and dried over anhydrous Na<sub>2</sub>SO<sub>4</sub>. Then, it was concentrated under reduced pressure and the crude residue was passed through a silica gel (60-120 mesh) column with gradient eluents of petroleum ether and ethyl acetate to get the desired pure product.

#### Synthesis of Cobalt and Nickel complexes:

Co(ClO<sub>4</sub>)<sub>2</sub>.6H<sub>2</sub>O or Ni(ClO<sub>4</sub>)<sub>2</sub>.6H<sub>2</sub>O (0.05 mmol) dissolved in 2 ml of methanol was added to a solution of ligand (0.10 mmol) in dichloromethane (2 ml) with stirring under atmosphere oxygen. The resulting solution was allowed to stir for 10 min at room temperature and then filtered. The filtrate obtained were the desired complexes and dried under vacuum. These complexes were characterized by High Resolution Mass spectroscopy (HRMS). For **30a-Co<sup>2+</sup>** HRMS (ESI): calcd for C<sub>34</sub>H<sub>28</sub>N<sub>2</sub>CoO<sub>6</sub>S<sub>2</sub> [M + H]<sup>+</sup>: 684.0794; Found 684.0793. For **30a-Ni<sup>2+</sup>** HRMS (ESI): calcd for C<sub>34</sub>H<sub>28</sub>N<sub>2</sub>NiO<sub>6</sub>S<sub>2</sub> [M + H]<sup>+</sup>: 683.0815; Found 683.0815.

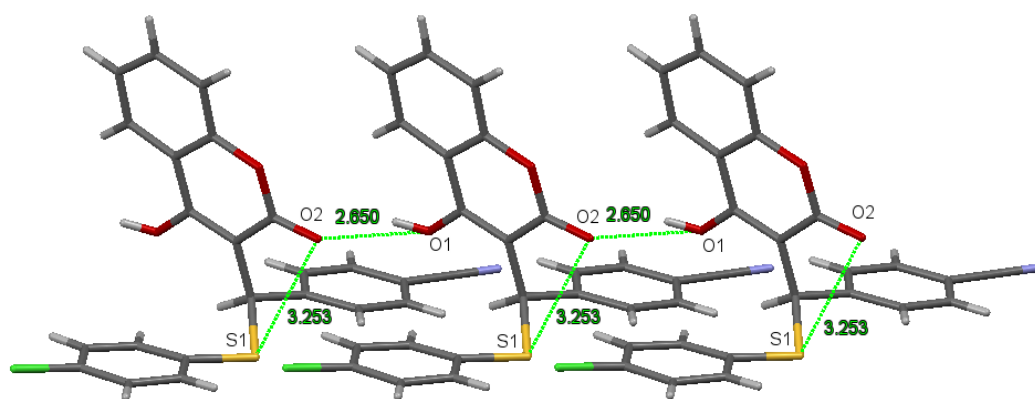

(a)

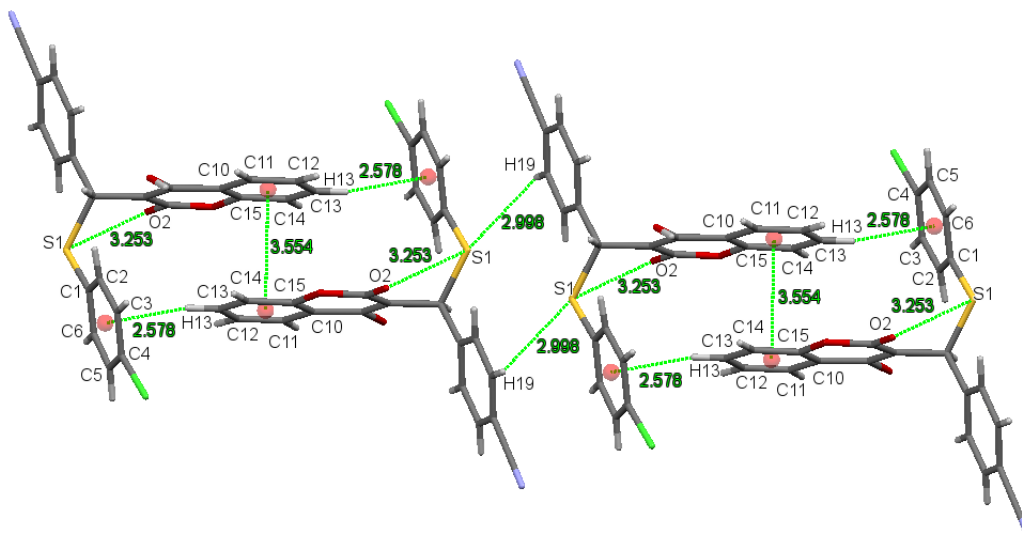

(b)

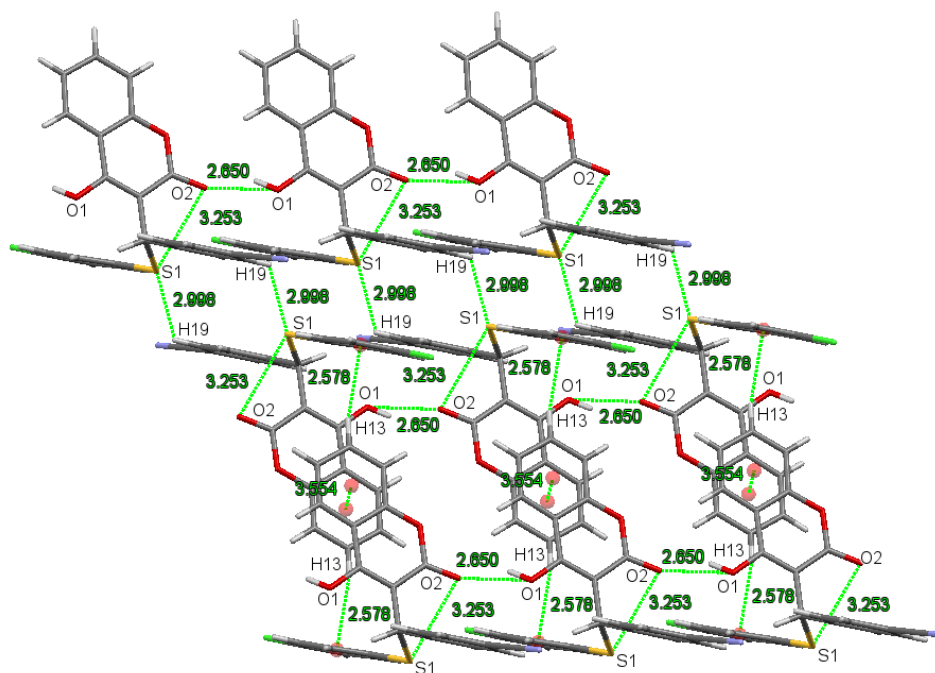

(c)

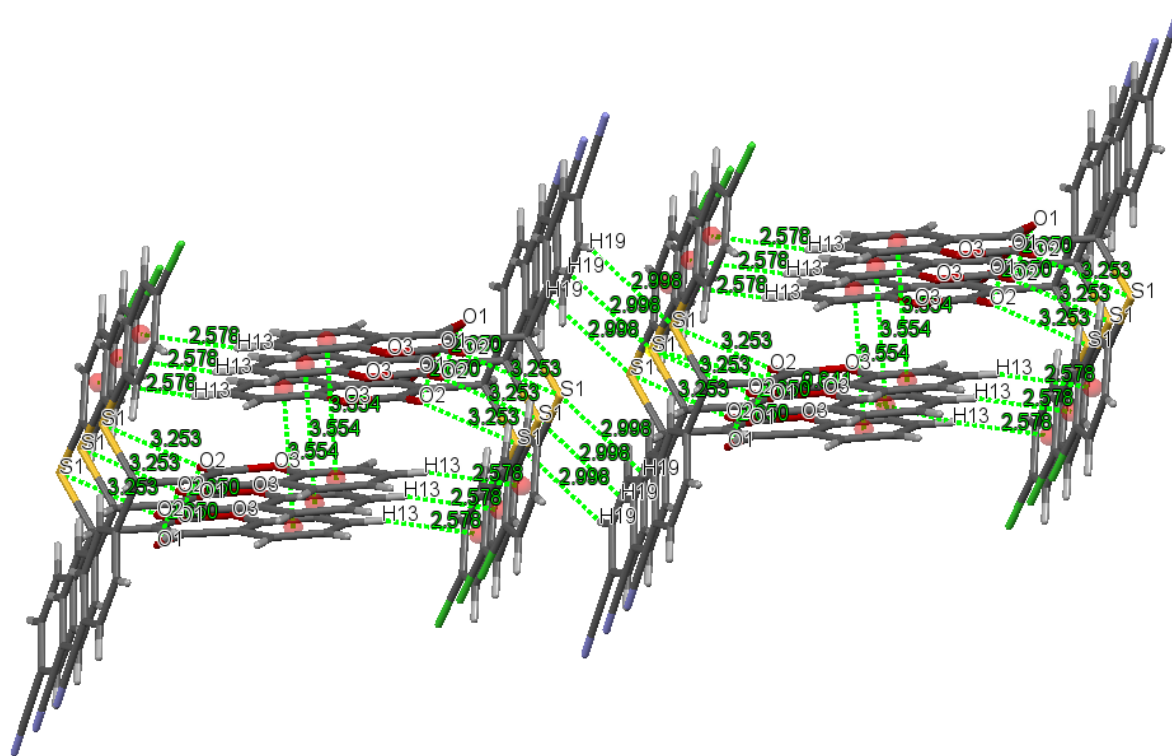

(d)

**Figure S1.** (a) Intra-hetero-atomic and intermolecular interaction to form the long chain structure along c-axis. (b) Packing diagram of **28a** forming a 2D sheet viewed along c-axis. (c) Top view (d) Side view of collectively presentation of interactions resulting in the formation of a molecular ladder.

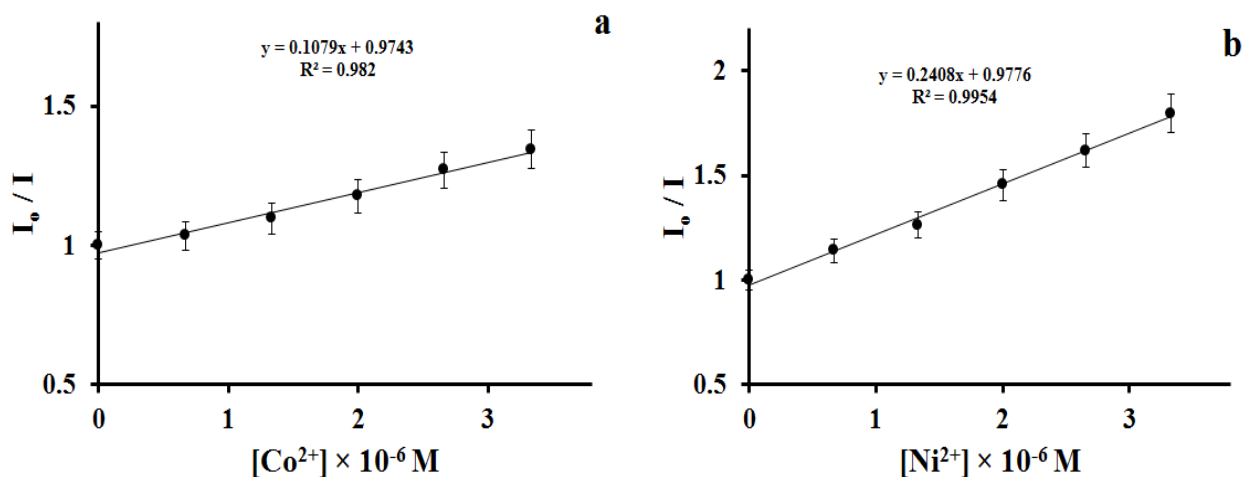

**Figure S2.** Stern-Volmer plots of ligand **30a** (25  $\mu\text{M}$ ) upon addition of (a)  $\text{Co}^{2+}$  and (b)  $\text{Ni}^{2+}$  in DMSO/HEPES buffer (9:1, pH=7.4) at room temperature.

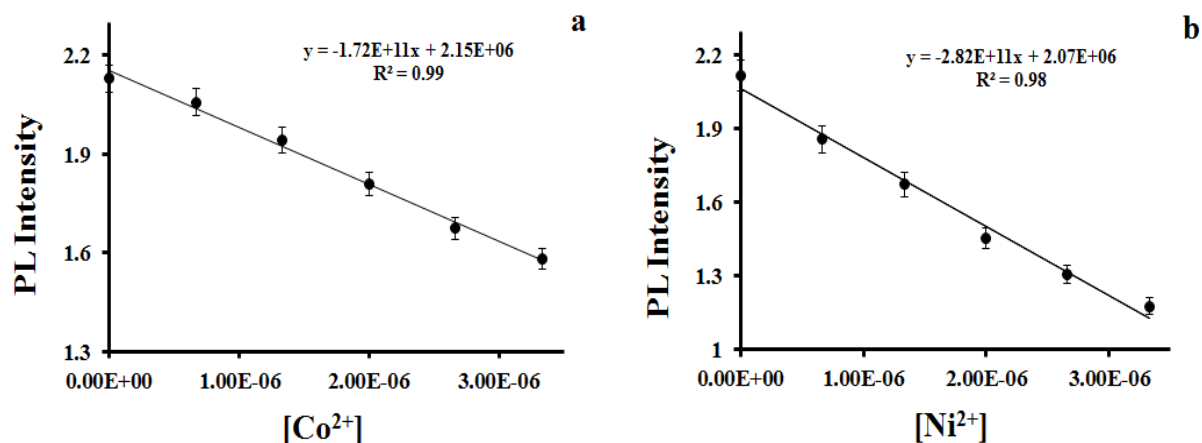

**Figure S3.** Detection limit plot for (a)  $\text{Co}^{2+}$  and (b)  $\text{Ni}^{2+}$  in DMSO/HEPES buffer (9:1, pH=7.4) at room temperature.

$$\text{LOD for } \text{Co}^{2+} = 3 * 12421.5 / 1.72 * 10^{11}$$

$$= 0.22 \mu\text{M}$$

$$\text{LOD for } \text{Ni}^{2+} = 3 * 12154.2 / 2.82 * 10^{11}$$

$$= 0.13 \mu\text{M}$$

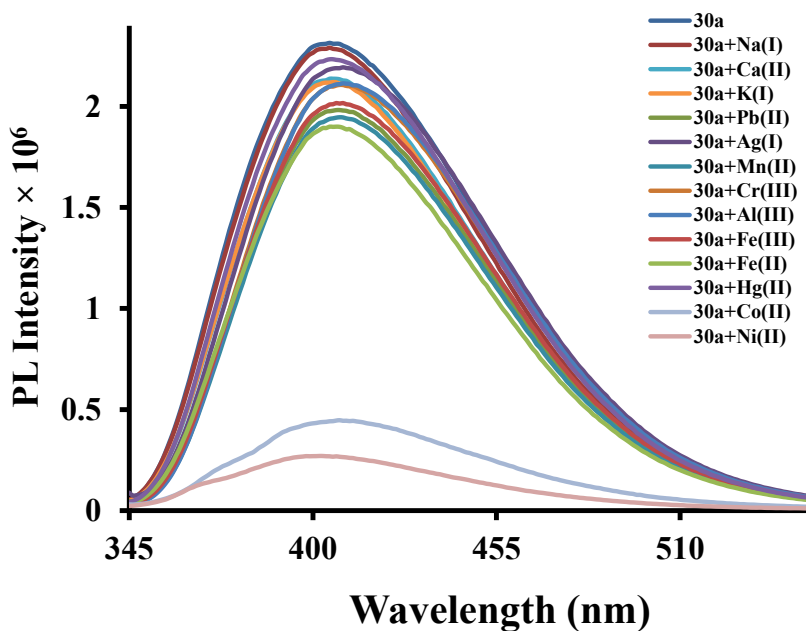

**Figure S4.** Effect of various metal ions on the emission of **30a** in DMSO/HEPES buffer (9:1, pH=7.4). Concentration of **30a** and each metal ion were  $25 \mu\text{M}$  and  $20 \mu\text{M}$ , respectively.

| Sample Name   | Position    | Instrument Name | User Name              |
|---------------|-------------|-----------------|------------------------|
| Inj Vol       | InjPosition | SampleType      | IRM Calibration Status |
| Data Filename | ACQ Method  | Comment         | Acquired Time          |

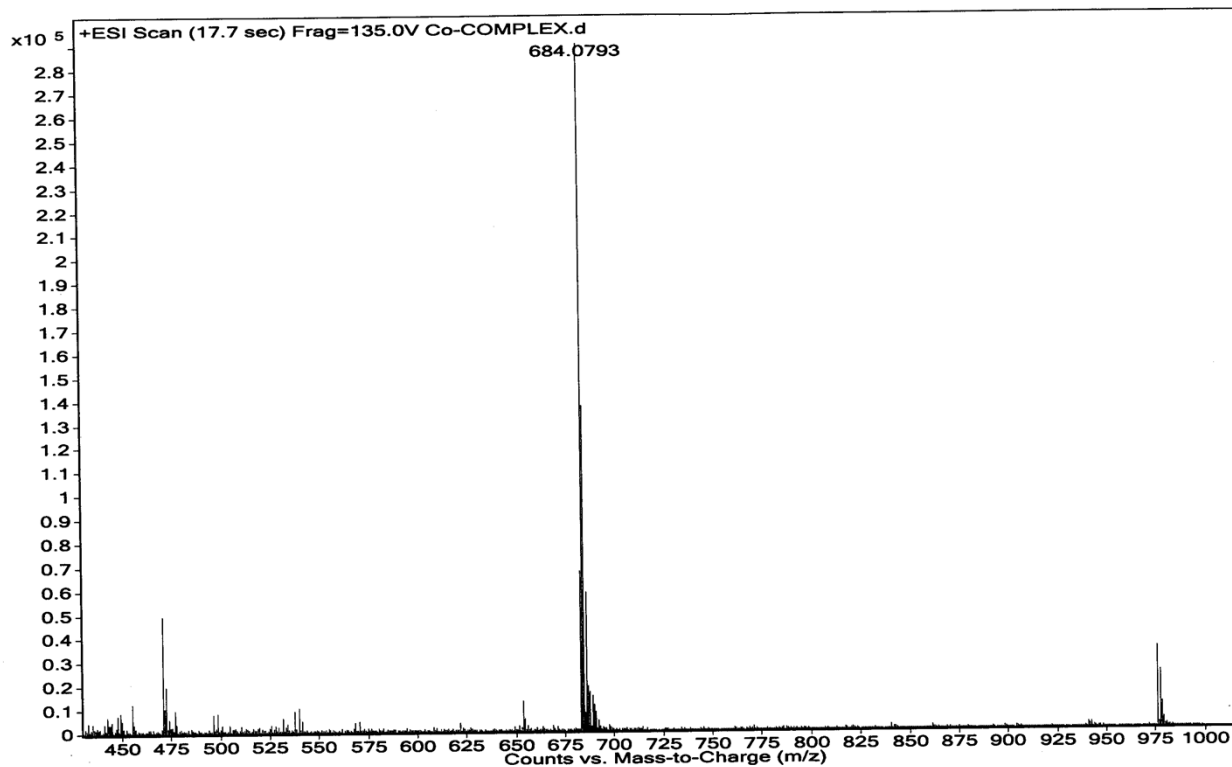

Figure S5. High resolution mass spectrum of **30a-Co<sup>2+</sup>** complex.

| Sample Name   | Position    | Instrument Name | User Name              |
|---------------|-------------|-----------------|------------------------|
| Inj Vol       | InjPosition | SampleType      | IRM Calibration Status |
| Data Filename | ACQ Method  | Comment         | Acquired Time          |

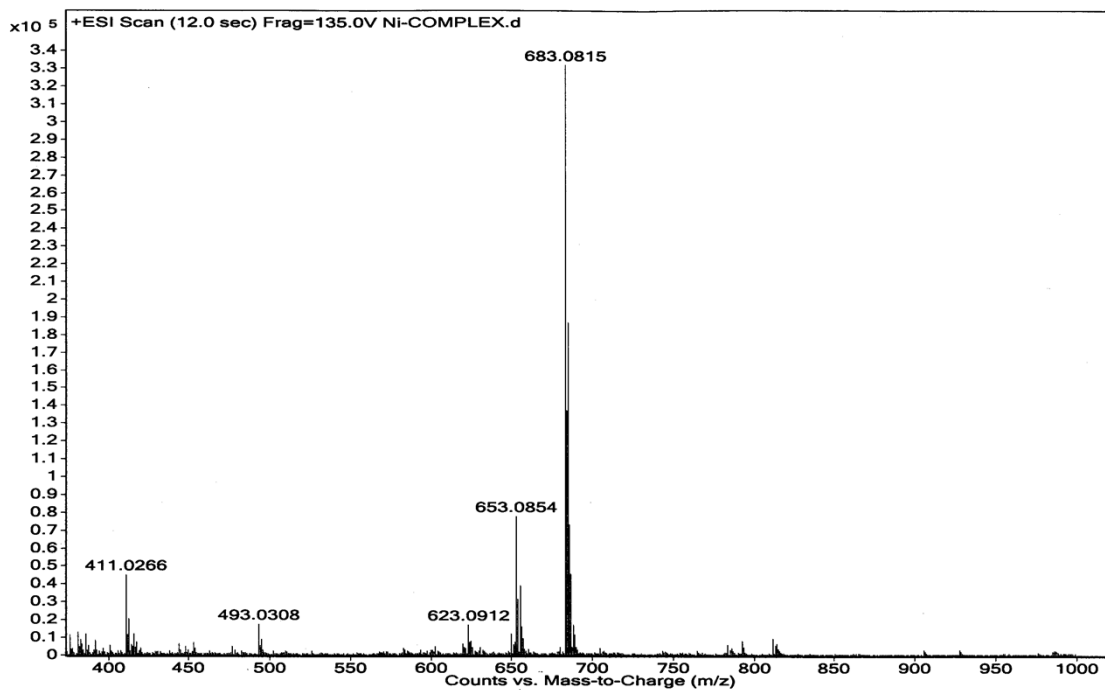

Figure S6. High resolution mass spectrum of **30a-Ni<sup>2+</sup>** complex.

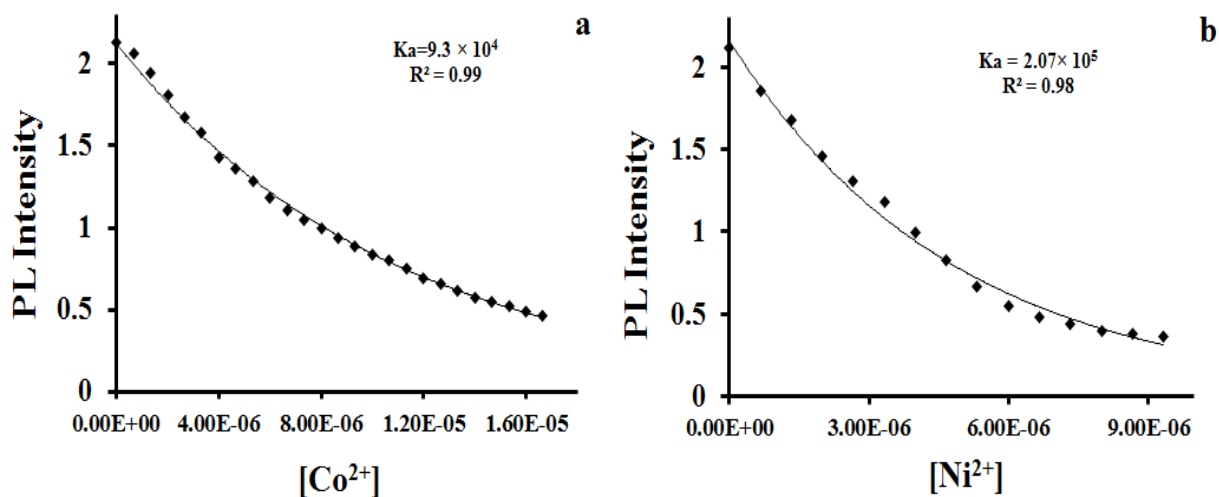

**Figure S7.** Plot of emission of ligand **30a** vs concentration of (a)  $Co^{2+}$  and (b)  $Ni^{2+}$  in DMSO/HEPES buffer (9:1, pH=7.4).

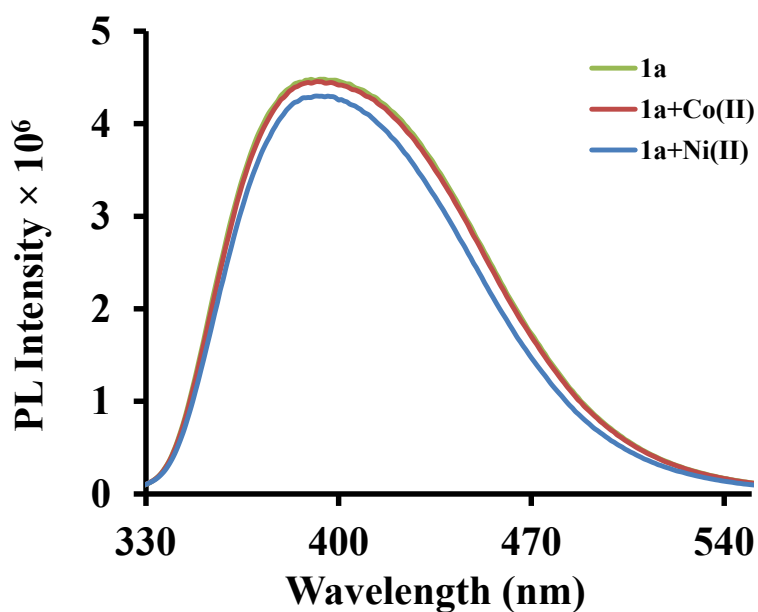

**Figure S8.** PL Spectra showing the effect of  $Co^{2+}/Ni^{2+}$  on the fluorescence emission of ligand **1a** in DMSO/HEPES buffer (9:1, pH=7.4) at room temperature.



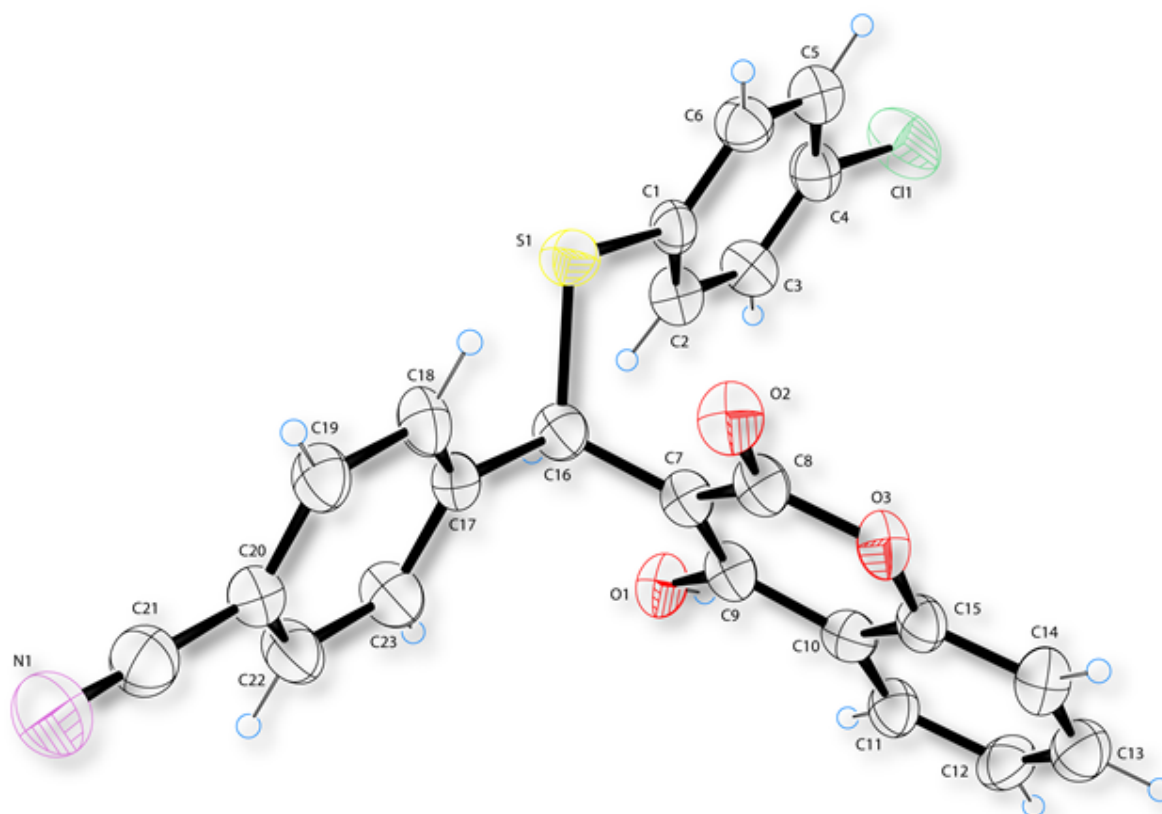

**Figure S9.** Showing ORTEP diagrams of the molecular structures (30 % probability) of **28a** and the labeling scheme used.

**Table S1.** Crystal data and structures refinement for the compound **28a** for atomic coordinates, equivalent isotropic displacement parameters and bond angles, please check the CIF.

| Parameters           | Compound 28a                                          |
|----------------------|-------------------------------------------------------|
| Empirical Formula    | C <sub>23</sub> H <sub>14</sub> Cl N O <sub>3</sub> S |
| Formula weight       | 419.86                                                |
| Temperature          | 296 K                                                 |
| Wavelength           | 0.71073 (Å)                                           |
| Crystal system       | Triclinic                                             |
| Space group          | <i>P</i> -1                                           |
| Radiation source     | 'fine-focus sealed tube'                              |
| Unit cell dimensions | $a = 6.8647(11)$ (Å), $\alpha = 112.561(8)^\circ$     |
|                      | $b = 10.9002(13)$ (Å), $\beta = 93.159(14)^\circ$     |
|                      | $c = 14.125(2)$ (Å), $\gamma = 92.253(10)^\circ$      |
| Unit cell volume     | 972.5(3) Å <sup>3</sup>                               |
| <i>Z</i>             | 2                                                     |

|                                             |                                                                      |
|---------------------------------------------|----------------------------------------------------------------------|
| Density                                     | 1.434 g/cm <sup>3</sup>                                              |
| Reflections collected                       | 7641                                                                 |
| Independent reflections                     | 3138 [ $R(\text{int}) = 0.0558$ ]                                    |
| Final $R_I$ values ( $I > 2\sigma(I)$ )     | 0.1338                                                               |
| Final $wR(F^2)$ values ( $I > 2\sigma(I)$ ) | 0.3299                                                               |
| Final $R_I$ values (all data)               | 0.2072                                                               |
| Final $wR(F^2)$ values (all data)           | 0.3775                                                               |
| Absorption coefficient, $\mu/\text{mm}$     | 0.329                                                                |
| Radiation type                              | Mo K $\alpha$                                                        |
| Goodness of fit on $F^2$                    | 1.075                                                                |
| $F(0\ 0\ 0)$                                | 432.0                                                                |
| Theta range for data collection             | 2.03 to 24.99 $^\circ$                                               |
| Index ranges                                | -8 $\leq h \leq$ 8,<br>-12 $\leq k \leq$ 12,<br>-16 $\leq l \leq$ 14 |
| Completeness to theta                       | 24.99 $^\circ$ 91.8 %                                                |
| Number of parameters                        | 263                                                                  |
| Number of restraints                        | 0                                                                    |
| Refinement method                           | Full-matrix least-squares on $F^2$                                   |
| CCDC number                                 | 1038726                                                              |

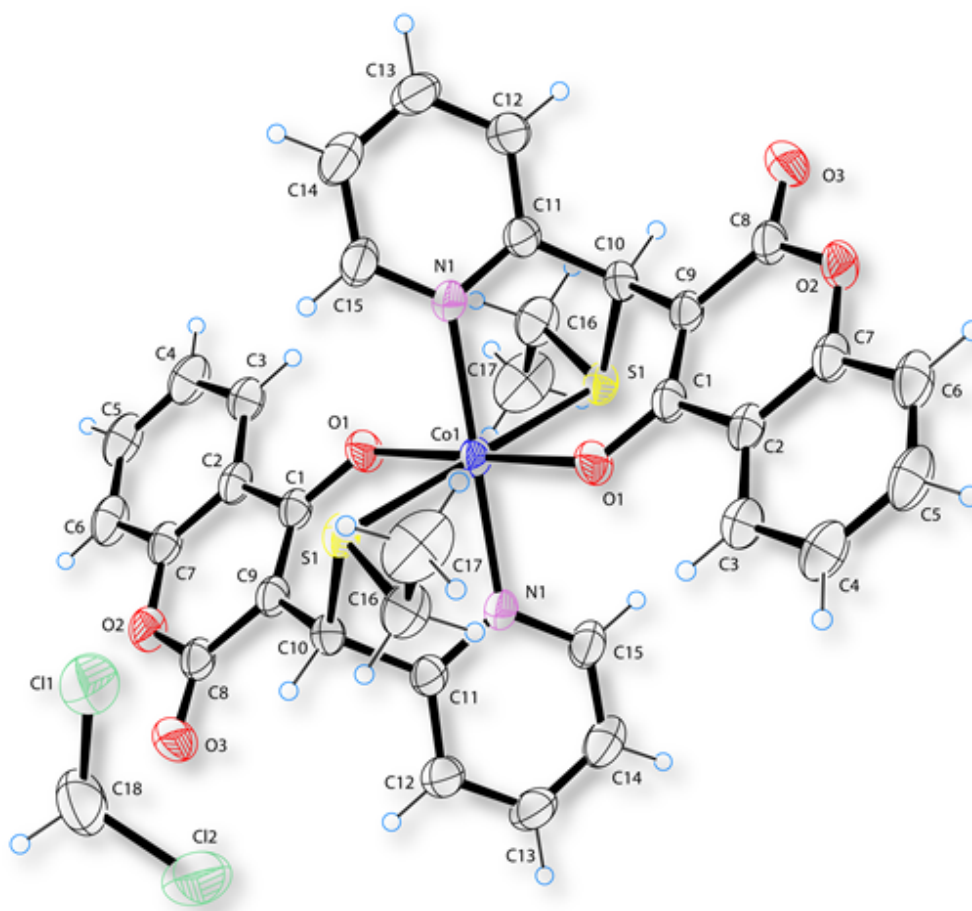

**Figure S10.** Showing ORTEP diagrams of the molecular structures (30 % probability) of **Co-complex** and the labeling scheme used.

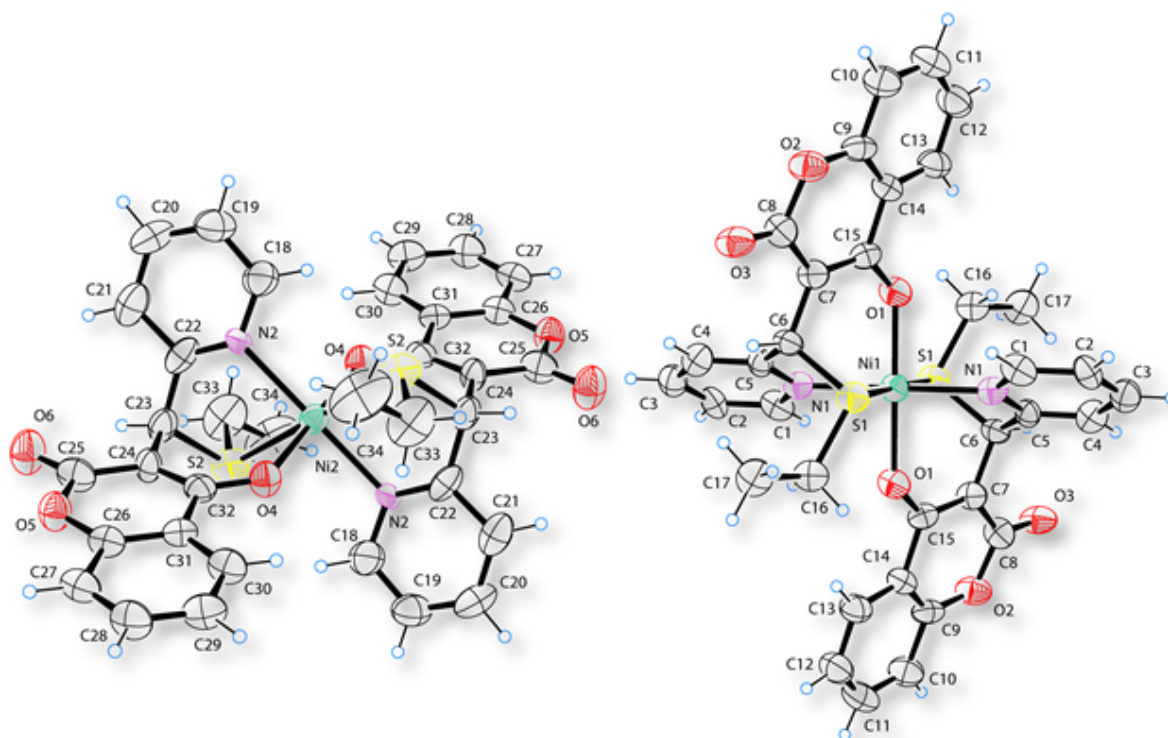

**Figure S11.** Showing ORTEP diagrams of the molecular structures (30 % probability) of the **Ni-complex** and the labeling scheme used.

**Table S2.** Crystal data and structures refinement for **Co-Complex** and **Ni-Complex**. For atomic coordinates, equivalent isotropic displacement parameters and bond angles, please check the CIF.

| Parameters        | Co Complex                                | Ni Complex                |
|-------------------|-------------------------------------------|---------------------------|
| Empirical Formula | $C_{34}H_{28}N_2O_6S_2Co \cdot 2CH_2Cl_2$ | $C_{34}H_{28}N_2O_6S_2Ni$ |
| Formula weight    | 853.49                                    | 683.427                   |
| Temperature       | 296 K                                     | 296 K                     |
| Wavelength        | 0.71073 (Å)                               | 0.71073 (Å)               |
| Crystal system    | Triclinic                                 | Triclinic                 |
| Space group       | <i>P</i> -1                               | <i>P</i> -1               |
| Radiation source  | 'fine-focus sealed tube'                  | 'fine-focus sealed tube'  |

|                                             |                                                                        |                                                                      |
|---------------------------------------------|------------------------------------------------------------------------|----------------------------------------------------------------------|
| Unit cell dimensions                        | $a = 8.3365(6) \text{ (\AA)},$<br>$\alpha = 82.838(5)^\circ$           | $a = 8.1460(16) \text{ (\AA)},$<br>$\alpha = 76.635(17)^\circ$       |
|                                             | $b = 11.1277(8) \text{ (\AA)},$<br>$\beta = 69.409(4)^\circ$           | $b = 11.425(2) \text{ (\AA)},$<br>$\beta = 83.429(17)^\circ$         |
|                                             | $c = 11.2945(8) \text{ (\AA)},$<br>$\gamma = 73.262(4)^\circ$          | $c = 17.576(4) \text{ (\AA)},$<br>$\gamma = 72.903(17)^\circ$        |
| Unit cell volume                            | 938.94(12) $\text{\AA}^3$                                              | 1519.3(5) $\text{\AA}^3$                                             |
| $Z$                                         | 1                                                                      | 2                                                                    |
| Density                                     | 1.509 $\text{g/cm}^3$                                                  | 1.494 $\text{g/cm}^3$                                                |
| Reflections collected                       | 13358                                                                  | 10908                                                                |
| Independent reflections                     | 3333 [ $R(\text{int}) = 0.0254$ ]                                      | 5482 [ $R(\text{int}) = 0.1085$ ]                                    |
| Final $R_I$ values ( $I > 2\sigma(I)$ )     | 0.0491                                                                 | 0.1013                                                               |
| Final $wR(F^2)$ values ( $I > 2\sigma(I)$ ) | 0.1421                                                                 | 0.1476                                                               |
| Final $R_I$ values (all data)               | 0.0615                                                                 | 0.2339                                                               |
| Final $wR(F^2)$ values (all data)           | 0.1553                                                                 | 0.2041                                                               |
| Absorption coefficient, $\mu/\text{mm}$     | 0.900                                                                  | 0.826                                                                |
| Radiation type                              | Mo K $\alpha$                                                          | Mo K $\alpha$                                                        |
| Goodness-of-fit (GOF) on $F^2$              | 0.987                                                                  | 1.102                                                                |
| $F(0\ 0\ 0)$                                | 437.0                                                                  | 708.0                                                                |
| Theta range for data collection             | 1.91 to 25.25 $^\circ$                                                 | 2.93 to 25.25 $^\circ$                                               |
| Index ranges                                | $-10 \leq h \leq 10,$<br>$-13 \leq k \leq 13,$<br>$-13 \leq l \leq 13$ | $-9 \leq h \leq 9,$<br>$-13 \leq k \leq 13,$<br>$-21 \leq l \leq 18$ |
| Completeness to theta                       | 25.25 $^\circ$ 98.1 %                                                  | 25.25 $^\circ$ 99.5 %                                                |
| Number of parameters                        | 233                                                                    | 411                                                                  |
| Number of restraints                        | 0                                                                      | 0                                                                    |
| Refinement method                           | Full-matrix least-squares<br>on $F^2$                                  | Full-matrix least-squares<br>on $F^2$                                |
| CCDC number                                 | 1038805                                                                | 1038804                                                              |

**Spectral data for all products:**

**3-((ethylthio)(phenyl)methyl)-4-hydroxy-2H-chromen-2-one (1a):** Yield: (260 mg, 83%); semi-solid; IR (KBr): 3428, 3070, 3030, 2973, 2928, 1707, 1665, 1624, 1572, 1494, 1453, 1404, 1332, 1288, 1250, 1210, 1164, 1107, 1035, 1002, 933, 896, 835, 757, 697  $\text{cm}^{-1}$ .  $^1\text{H}$  NMR (400 MHz,  $\text{CDCl}_3$ ):  $\delta$  1.34 (t,  $J = 6.8$  Hz, 3H), 7.58-7.72 (m, 2H), 5.77 (s, 1H), 7.25-7.30 (m, 5H), 7.44 (d,  $J = 6.0$  Hz, 2H), 7.53 (t,  $J = 6.4$  Hz, 1H), 7.95 (d,  $J = 7.6$  Hz, 1H), 10.85 (s, 1H, OH) ppm.  $^{13}\text{C}$  NMR (100 MHz,  $\text{CDCl}_3$ ):  $\delta$  14.0, 26.8, 45.4, 101.3, 116.0, 116.5, 123.5, 124.2, 127.8 (2C), 128.1, 129.0 (2C), 132.6, 137.9, 152.9, 162.9, 163.6 ppm. HRMS (ESI): calcd for  $\text{C}_{18}\text{H}_{16}\text{O}_3\text{S}$  [ $\text{M} + \text{H}$ ] $^+$ : 313.0893; Found 313.0912.

**4-hydroxy-3-(phenyl(propylthio)methyl)-2H-chromen-2-one (2a):** Yield: (278 mg, 85%); white solid; mp 90-92  $^\circ\text{C}$ . IR (KBr): 3455, 3059, 3028, 2964, 2931, 2875, 1707, 1666, 1625, 1572, 1494, 1453, 1404, 1349, 1332, 1281, 1265, 1250, 1209, 1164, 1108, 1035, 933, 896, 834, 798, 757, 736, 697  $\text{cm}^{-1}$ .  $^1\text{H}$  NMR (400 MHz,  $\text{CDCl}_3$ ):  $\delta$  1.02 (t,  $J = 7.6$  Hz, 3H), 1.64-1.74 (m, 2H), 2.52-2.59 (m, 1H), 2.69-2.75 (m, 1H), 5.71 (s, 1H), 7.28-7.36 (m, 5H), 7.43 (d,  $J = 6.8$  Hz, 2H), 7.58 (t,  $J = 7.2$  Hz, 1H), 7.96 (d,  $J = 7.6$  Hz, 1H), 10.99 (s, 1H, OH) ppm.  $^{13}\text{C}$  NMR (100 MHz,  $\text{CDCl}_3$ ):  $\delta$  13.5, 22.1, 34.7, 45.7, 101.3, 116.1, 116.5, 123.5, 124.1, 127.8 (2C), 128.1, 129.1 (2C), 132.5, 138.1, 153.1, 162.7, 163.5 ppm. HRMS (ESI): calcd for  $\text{C}_{19}\text{H}_{18}\text{O}_3\text{S}$  [ $\text{M} + \text{H}$ ] $^+$ : 327.1049; Found 327.1060.

**3-((benzylthio)(phenyl)methyl)-4-hydroxy-2H-chromen-2-one (3a):** Yield: (285 mg, 76%); White crystalline solid; mp 110-112  $^\circ\text{C}$ . IR (KBr): 3086, 3059, 3026, 3000, 1700, 1623, 1570, 1494, 1454, 1385, 1332, 1281, 1243, 1210, 1180, 1164, 1103, 1071, 1036, 1001, 950, 933, 911, 896, 836, 797, 777, 764, 752, 729, 712, 696, 671  $\text{cm}^{-1}$ .  $^1\text{H}$  NMR (400 MHz,  $\text{CDCl}_3$ ):  $\delta$  3.86 (s, 2H), 5.60 (s, 1H), 7.17 (s, 1H), 7.26-7.37 (m, 11H), 7.57 (t,  $J = 7.6$  Hz, 1H), 7.92 (d,  $J = 8.0$  Hz, 1H), 10.63 (s, 1H, OH) ppm.  $^{13}\text{C}$  NMR (100 MHz,  $\text{CDCl}_3$ ):  $\delta$  37.7,

46.0, 101.5, 116.1, 116.5, 123.6, 124.1, 127.7, 127.9 (2C), 128.2, 128.8 (2C), 128.9 (2C), 129.0 (2C), 132.5, 136.0, 137.6, 153.0, 162.5, 163.3 ppm. HRMS (APCI): calcd for  $C_{23}H_{18}O_3S$   $[M + H]^+$ : 375.1049; Found 375.1049.

**3-(((2-chlorobenzyl)thio)(phenyl)methyl)-4-hydroxy-2H-chromen-2-one (4a):** Yield: (319 mg, 78%); White solid; mp 146-148 °C. IR (KBr): 3445, 3062, 2952, 1817, 1684, 1622, 1611, 1572, 1495, 1472, 1442, 1416, 1384, 1331, 1278, 1250, 1237, 1205, 1165, 1146, 1108, 1054, 1038, 1001, 933, 896, 831, 759, 738, 707, 693, 668  $cm^{-1}$ .  $^1H$  NMR (400 MHz,  $CDCl_3$ ):  $\delta$  4.00 (dd,  $J_1 = 13.2$  Hz &  $J_2 = 13.2$  Hz, 2H), 5.66 (s, 1H), 7.06 (d,  $J = 7.2$  Hz, 1H), 7.11 (t,  $J = 7.6$  Hz, 1H), 7.24 (d,  $J = 7.6$  Hz, 2H), 7.28-7.33 (m, 5H), 7.36 (d,  $J = 7.2$  Hz, 2H), 7.56 (t,  $J = 8.0$  Hz, 1H), 7.88 (d,  $J = 8.4$  Hz, 1H), 10.53 (s, 1H, OH) ppm.  $^{13}C$  NMR (100 MHz,  $CDCl_3$ ):  $\delta$  35.7, 46.4, 101.7, 116.1, 116.5, 123.6, 124.1, 127.1, 128.0 (2C), 128.3, 129.0 (2C), 129.2, 130.0, 131.0, 132.5, 133.9, 134.1, 137.5, 152.9, 162.6, 163.4 ppm. HRMS (ESI): calcd for  $C_{23}H_{17}ClO_3S$   $[M + H]^+$ : 409.0660; Found 409.0662.

**4-hydroxy-3-(((2-hydroxyethyl)thio)(phenyl)methyl)-2H-chromen-2-one (5a):** Yield: (198 mg, 60%); White solid; mp 126-128 °C. IR (KBr): 3448, 2929, 2865, 2589, 1670, 1621, 1610, 1569, 1495, 1453, 1426, 1409, 1334, 1309, 1277, 1250, 1206, 1166, 1103, 1071, 1047, 1002, 936, 897, 863, 800, 760, 735, 696  $cm^{-1}$ .  $^1H$  NMR (400 MHz,  $CDCl_3$ ):  $\delta$  2.35 (s, 1H, OH), 2.77-2.89 (m, 2H), 3.89 (s, 2H), 5.82 (s, 1H), 7.28-7.31 (m, 5H), 7.44 (d,  $J = 7.2$  Hz, 2H), 7.56 (t,  $J = 8.4$  Hz, 1H), 7.93 (d,  $J = 7.6$  Hz, 1H), 10.48 (s, 1H, OH) ppm.  $^{13}C$  NMR (100 MHz,  $CDCl_3$ ):  $\delta$  35.2, 45.7, 60.9, 101.7, 116.1, 116.7, 123.7, 124.3, 127.9 (2C), 128.4, 129.1 (2C), 132.8, 137.8, 153.0, 163.0, 163.6 ppm. HRMS (ESI): calcd for  $C_{18}H_{16}O_4S$   $[M + Na]^+$ : 351.0662; Found 351.0664.

**4-hydroxy-3-(phenyl(phenylthio)methyl)-2H-chromen-2-one (6a):**<sup>23</sup> Yield: (249 mg, 69%); White solid; mp 160-161 °C. IR (KBr): 3449, 3050, 3023, 2978, 1652, 1611, 1596, 1561,

1537, 1491, 1479, 1450, 1437, 1420, 1347, 1261, 1230, 1204, 1167, 1155, 1103, 1084, 1027, 997, 925, 848, 756, 740, 720, 690, 666  $\text{cm}^{-1}$ .  $^1\text{H}$  NMR (400 MHz,  $\text{CDCl}_3$ ):  $\delta$  6.18 (s, 1H), 7.23-7.32 (m, 6H), 7.36 (t,  $J = 7.6$  Hz, 2H), 7.48 (d,  $J = 7.6$  Hz, 2H), 7.52 (d,  $J = 7.2$  Hz, 3H), 7.91 (d,  $J = 8.4$  Hz, 1H), 10.32 (s, 1H, OH) ppm.  $^{13}\text{C}$  NMR (100 MHz,  $\text{CDCl}_3$ ):  $\delta$  49.6, 102.3, 116.0, 116.6, 123.6, 124.1, 128.1 (2C), 128.5, 128.6, 129.2 (2C), 129.6 (2C), 130.9 (2C), 132.1, 132.6, 136.9, 152.8, 162.7, 163.1 ppm. HRMS (ESI): calcd for  $\text{C}_{22}\text{H}_{16}\text{O}_3\text{S}$  [ $\text{M} + \text{H}$ ] $^+$ : 361.0893; Found 361.0905.

**4-hydroxy-3-(((4-methoxyphenyl)thio)(phenyl)methyl)-2H-chromen-2-one (7a):** Yield: (301 mg, 77%); White solid; mp 126-127  $^\circ\text{C}$ . IR (KBr): 3434, 3063, 2932, 1686, 1624, 1610, 1590, 1572, 1494, 1453, 1439, 1390, 1330, 1291, 1249, 1210, 1179, 1166, 1110, 1029, 932, 896, 847, 832, 817, 799, 757, 731, 711, 702, 669  $\text{cm}^{-1}$ .  $^1\text{H}$  NMR (400 MHz,  $\text{CDCl}_3$ ):  $\delta$  3.74 (s, 3H), 6.02 (s, 1H), 6.79 (d,  $J = 8.0$  Hz, 2H), 7.24 (d,  $J = 9.6$  Hz, 1H), 7.31 (t,  $J = 7.6$  Hz, 2H), 7.36 (d,  $J = 7.2$  Hz, 2H), 7.45 (d,  $J = 7.2$  Hz, 2H), 7.50 (d,  $J = 8.0$  Hz, 2H), 7.54 (d,  $J = 8.0$  Hz, 1H), 7.95 (d,  $J = 8.0$  Hz, 1H), 10.48 (s, 1H, OH) ppm.  $^{13}\text{C}$  NMR (100 MHz,  $\text{CDCl}_3$ ):  $\delta$  51.4, 55.4, 102.4, 115.3 (2C), 116.2, 116.6, 122.2, 123.6, 124.2, 128.1 (2C), 128.4, 129.2 (2C), 132.5, 134.2 (2C), 137.2, 152.9, 160.4, 162.7, 163.0 ppm. HRMS (APCI): calcd for  $\text{C}_{23}\text{H}_{18}\text{O}_4\text{S}$  [ $\text{M} + \text{H}$ ] $^+$ : 391.0999; Found 391.0994.

**3-(((4-chlorophenyl)thio)(phenyl)methyl)-4-hydroxy-2H-chromen-2-one (8a):** Yield: (297 mg, 75%); White solid; mp 167-169  $^\circ\text{C}$ . IR (KBr): 3084, 3022, 2973, 1653, 1611, 1596, 1559, 1540, 1491, 1476, 1451, 1418, 1391, 1341, 1318, 1286, 1229, 1196, 1166, 1152, 1103, 1095, 1080, 1030, 1010, 950, 923, 860, 847, 832, 820, 787, 754, 720, 698, 664  $\text{cm}^{-1}$ .  $^1\text{H}$  NMR (400 MHz,  $\text{CDCl}_3$ ):  $\delta$  6.18 (s, 1H), 7.26 (s, 4H), 7.31-7.37 (m, 3H), 7.41 (d,  $J = 8.4$  Hz, 2H), 7.50-7.55 (m, 3H), 7.90 (d,  $J = 6.4$  Hz, 1H), 10.04 (s, 1H, OH) ppm.  $^{13}\text{C}$  NMR (100 MHz,  $\text{CDCl}_3$ ):  $\delta$  49.7, 102.1, 115.9, 116.7, 123.6, 124.3, 128.1 (2C), 128.7, 129.3 (2C), 129.9

(2C), 130.6, 132.3 (2C), 132.8, 134.8, 136.5, 152.9, 162.8, 163.1 ppm. HRMS (ESI): calcd for C<sub>22</sub>H<sub>15</sub>ClO<sub>3</sub>S [M + H]<sup>+</sup>: 395.0503; Found 395.0512.

**3-(((2-chlorophenyl)thio)(phenyl)methyl)-4-hydroxy-2H-chromen-2-one (9a):** Yield: (281 mg, 71%); White solid; mp 179-180 °C. IR (KBr): 3312, 3064, 1676, 1621, 1568, 1496, 1450, 1431, 1396, 1335, 1299, 1273, 1220, 1191, 1169, 1147, 1105, 1070, 1033, 949, 912, 892, 854, 784, 757, 748, 734, 718, 678 cm<sup>-1</sup>. <sup>1</sup>H NMR (400 MHz, CDCl<sub>3</sub>): δ 6.32 (s, 1H), 7.18 (t, *J* = 4.0 Hz, 2H), 7.25-7.33 (m, 3H), 7.35 (d, *J* = 5.2 Hz, 1H), 7.39 (d, *J* = 7.2 Hz, 2H), 7.44 (d, *J* = 7.6 Hz, 1H), 7.54 (d, *J* = 7.6 Hz, 3H), 7.90 (d, *J* = 7.6 Hz, 1H), 9.97 (s, 1H, OH) ppm. <sup>13</sup>C NMR (100 MHz, CDCl<sub>3</sub>): δ 47.5, 101.9, 116.0, 116.6, 123.8, 124.3, 127.9, 128.3 (2C), 128.8, 129.0, 129.4 (2C), 130.4, 130.7, 131.8, 132.7, 134.6, 136.3, 152.9, 162.7, 163.4 ppm. HRMS (ESI): calcd for C<sub>22</sub>H<sub>15</sub>ClO<sub>3</sub>S [M + K]<sup>+</sup>: 433.0062; Found 433.0053.

**3-(((2-bromophenyl)thio)(phenyl)methyl)-4-hydroxy-2H-chromen-2-one (10a):** Yield: (321 mg, 73%); White solid; mp 181-183 °C. IR (KBr): 3321, 3070, 1676, 1622, 1568, 1496, 1449, 1427, 1395, 1335, 1298, 1271, 1220, 1189, 1173, 1147, 1105, 1070, 1017, 911, 891, 853, 784, 756, 732, 719, 678, 647 cm<sup>-1</sup>. <sup>1</sup>H NMR (400 MHz, CDCl<sub>3</sub>): δ 6.33 (s, 1H), 7.09 (t, *J* = 7.6 Hz, 1H), 7.24 (d, *J* = 7.6 Hz, 1H), 7.29 (t, *J* = 7.2 Hz, 1H), 7.32-7.36 (m, 2H), 7.39 (t, *J* = 7.6 Hz, 1H), 7.43 (d, *J* = 8.0 Hz, 1H), 7.56 (t, *J* = 8.0 Hz, 5H), 7.91 (d, *J* = 7.6 Hz, 1H), 9.94 (s, 1H, OH) ppm. <sup>13</sup>C NMR (100 MHz, CDCl<sub>3</sub>): δ 47.7, 101.8, 115.9, 116.6, 123.8, 124.2, 124.3, 128.3 (2C), 128.5, 128.8, 128.9, 129.3 (2C), 130.2, 132.7, 133.6, 133.9, 136.2, 152.8, 162.8, 163.4 ppm. HRMS (ESI): calcd for C<sub>22</sub>H<sub>15</sub>BrO<sub>3</sub>S [M + H]<sup>+</sup>: 440.9979; Found 441.0000.

**4-hydroxy-3-((naphthalen-2-ylthio)(phenyl)methyl)-2H-chromen-2-one (11a):** Yield: (312 mg, 76%); White solid; mp 153-155 °C. IR (KBr): 3078, 3052, 1683, 1662, 1622, 1607, 1593, 1567, 1494, 1446, 1399, 1340, 1281, 1228, 1194, 1165, 1148, 1108, 1080, 1029, 943,



916, 894, 860, 850, 839, 813, 777, 758, 738, 717, 697, 647  $\text{cm}^{-1}$ .  $^1\text{H}$  NMR (400 MHz,  $\text{CDCl}_3$ ):  $\delta$  6.35 (s, 1H), 7.21 (d,  $J = 8.0$  Hz, 1H), 7.33-7.38 (m, 3H), 7.45-7.49 (m, 3H), 7.56-7.57 (m, 3H), 7.76-7.78 (m, 4H), 7.90 (d,  $J = 6.4$  Hz, 1H), 7.95 (s, 1H) 10.34 (s, 1H, OH) ppm.  $^{13}\text{C}$  NMR (100 MHz,  $\text{CDCl}_3$ ):  $\delta$  49.3, 102.3, 116.0, 116.6, 123.6, 124.1, 126.9, 127.0, 127.4, 127.7, 127.8, 127.9, 128.2 (2C), 128.6, 129.3 (2C), 129.5, 129.9, 132.6, 132.8, 133.7, 136.8, 152.8, 162.8, 163.2 ppm. HRMS (ESI): calcd for  $\text{C}_{26}\text{H}_{18}\text{O}_3\text{S}$   $[\text{M}]^+$ : 410.0977; Found 410.0983.

**4-hydroxy-3-((4-hydroxyphenyl)(phenylthio)methyl)-2H-chromen-2-one (12a)**: Yield: (272 mg, 72%); White solid; mp 115-117  $^\circ\text{C}$ . IR (KBr): 3068, 2606, 2360, 2256, 2126, 1657, 1601, 1566, 1514, 1474, 1452, 1437, 1354, 1311, 1271, 1253, 1217, 1182, 1160, 1114, 1097, 1048, 1024, 995, 907, 841, 791, 764, 740, 688, 675  $\text{cm}^{-1}$ .  $^1\text{H}$  NMR (400 MHz,  $\text{CDCl}_3$ ):  $\delta$  5.63 (s, 1H, OH), 6.03 (s, 1H), 6.69 (d,  $J = 8.8$  Hz, 2H), 7.16-7.24 (m, 7H), 7.38 (d,  $J = 8.0$  Hz, 2H), 7.46 (t,  $J = 8.0$  Hz, 1H), 7.84 (d,  $J = 8.0$  Hz, 1H), 10.34 (s, 1H, OH) ppm.  $^{13}\text{C}$  NMR (100 MHz,  $\text{CDCl}_3 + \text{DMSO}$ ):  $\delta$  46.7, 105.5, 114.4 (2C), 115.2, 115.4, 123.0, 125.7, 128.1 (3C), 128.2 (2C), 129.1 (2C), 129.2, 131.2, 135.9, 151.5, 155.7, 160.0, 161.3 ppm. HRMS (ESI): calcd for  $\text{C}_{22}\text{H}_{16}\text{O}_4\text{S}$   $[\text{M} + \text{K}]^+$ : 415.0401; Found 415.0393.

**4-hydroxy-3-((phenylthio)(p-tolyl)methyl)-2H-chromen-2-one (13a)**: Yield: (251 mg, 67%); White solid; mp 134-136  $^\circ\text{C}$ . IR (KBr): 3089, 2919, 2850, 2362, 1695, 1625, 1572, 1514, 1495, 1455, 1439, 1279, 1250, 1205, 1159, 1109, 1037, 931, 897, 762, 756, 748, 711, 692  $\text{cm}^{-1}$ .  $^1\text{H}$  NMR (400 MHz,  $\text{CDCl}_3$ ):  $\delta$  2.34 (s, 3H), 6.17 (s, 1H), 7.17 (d,  $J = 8.0$  Hz, 2H), 7.23-7.31 (m, 5H), 7.42 (d,  $J = 7.6$  Hz, 2H), 7.48 (d,  $J = 7.2$  Hz, 2H), 7.53 (t,  $J = 8.0$  Hz, 1H), 7.92 (d,  $J = 8.0$  Hz, 1H), 10.30 (s, 1H, OH) ppm.  $^{13}\text{C}$  NMR (100 MHz,  $\text{CDCl}_3$ ):  $\delta$  21.2, 49.3, 102.5, 116.0, 116.5, 123.6, 124.1, 128.0 (2C), 128.4, 129.6 (2C), 129.9 (2C), 130.8 (2C),

132.3, 132.5, 133.9, 138.4, 152.8, 162.7, 163.0 ppm. HRMS (ESI): calcd for C<sub>23</sub>H<sub>18</sub>O<sub>3</sub>S [M + H]<sup>+</sup>: 375.1049; Found 375.1057.

**3-(cyclohexyl(phenylthio)methyl)-4-hydroxy-2H-chromen-2-one (14a):** Yield: (195 mg, 53%); dark brown semi-solid; IR (KBr): 3418, 2927, 2851, 1704, 1666, 1622, 1570, 1495, 1480, 1449, 1439, 1385, 1330, 1282, 1202, 1170, 1106, 1068, 1025, 959, 897, 760, 689 cm<sup>-1</sup>. <sup>1</sup>H NMR (400 MHz, CDCl<sub>3</sub>): δ 1.43-1.25 (m, 4H), 1.37-1.45 (m, 1H), 1.59-1.79 (m, 4H), 1.96-2.08 (m, 2H), 4.89 (d, *J* = 6.4 Hz, 1H), 7.15-7.27 (m, 5H), 7.36 (d, *J* = 7.2 Hz, 2H), 7.49 (t, *J* = 8.0 Hz, 1H), 7.82 (d, *J* = 7.6 Hz, 1H), 9.98 (s, 1H, OH) ppm. <sup>13</sup>C NMR (100 MHz, CDCl<sub>3</sub>): δ 26.0, 26.2, 26.3, 31.0, 31.1, 42.5, 51.7, 102.7, 116.0, 116.3, 123.3, 123.9, 127.8, 129.3 (2C), 130.7 (2C), 131.8, 132.1, 152.6, 162.5, 163.4 ppm. HRMS (ESI): calcd for C<sub>22</sub>H<sub>22</sub>O<sub>3</sub>S [M + H]<sup>+</sup>: 367.1362; Found 367.1383.

**(E)-4-hydroxy-3-(1-(phenylthio)but-2-en-1-yl)-2H-chromen-2-one (15a):** Yield: (163 mg, 50%); dark brown semi-solid; IR (KBr): 3419, 2978, 2924, 2853, 1711, 1627, 1609, 1573, 1493, 1454, 1438, 1415, 1382, 1327, 1276, 1213, 1187, 1112, 1036, 906, 757, 691, 666 cm<sup>-1</sup>. <sup>1</sup>H NMR (400 MHz, CDCl<sub>3</sub>): δ 1.47 (d, *J* = 6.8 Hz, 3H), 5.21-5.22 (m, 1H), 5.50 (d, *J* = 9.6 Hz, 1H), 6.49 (d, *J* = 10.0 Hz, 1H), 7.14-7.23 (m, 6H), 7.43 (dd, *J*<sub>1</sub> = 7.2 Hz & *J*<sub>2</sub> = 7.6 Hz, 2H), 7.69 (d, *J* = 8.4 Hz, 1H) ppm. <sup>13</sup>C NMR (100 MHz, CDCl<sub>3</sub>): δ 22.0, 74.6, 101.0, 115.4, 116.9 (2C), 118.2, 122.4, 122.9, 124.2, 127.3, 127.7, 129.2, 129.4, 132.3 (2C), 153.3, 159.5, 161.0 ppm. HRMS (ESI): calcd for C<sub>19</sub>H<sub>16</sub>O<sub>3</sub>S [M + H]<sup>+</sup>: 325.0893; Found 325.0896.

**4-hydroxy-3-(phenyl(*p*-tolylthio)methyl)-2H-chromen-2-one (16a):** Yield: (270 mg, 72%); White solid; mp 134-135 °C. IR (KBr): 3446, 3063, 2920, 1686, 1654, 1620, 1611, 1572, 1561, 1535, 1492, 1453, 1390, 1279, 1229, 1202, 1166, 1103, 1087, 1036, 931, 848, 821, 805, 753, 724, 700 cm<sup>-1</sup>. <sup>1</sup>H NMR (400 MHz, CDCl<sub>3</sub>): δ 2.27 (s, 3H), 6.10 (s, 1H), 7.08 (d, *J* = 8.8 Hz, 2H), 7.24 (d, *J* = 8.0 Hz, 1H), 7.30 (t, *J* = 7.2 Hz, 1H), 7.35 (d, *J* = 8.0 Hz, 2H),

7.38 (d,  $J = 8.4$  Hz, 3H), 7.50-7.53 (m, 3H), 7.93 (d,  $J = 8.0$  Hz, 1H), 10.45 (s, 1H, OH) ppm;  $^{13}\text{C}$  NMR (100 MHz,  $\text{CDCl}_3$ ):  $\delta$  21.3, 50.3, 102.4, 116.2, 116.6, 123.6, 124.2, 128.1 (2C), 128.4, 128.5, 129.2 (2C), 130.5 (2C), 131.5 (2C), 132.5, 137.1, 139.0, 152.9, 162.7, 163.1 ppm. HRMS (APCI): calcd for  $\text{C}_{23}\text{H}_{18}\text{O}_3\text{S}$   $[\text{M} + \text{H}]^+$ : 375.1049; Found 375.1048.

**4-hydroxy-3-((4-hydroxyphenyl)(p-tolylthio)methyl)-2H-chromen-2-one (17a):** Yield: (297 mg, 76%); White solid; mp 144-145 °C. IR (KBr): 3313, 3124, 1665, 1610, 1591, 1571, 1512, 1496, 1455, 1438, 1284, 1272, 1253, 1225, 1177, 1159, 1107, 1059, 1030, 1017, 845, 838, 802, 763, 750, 669  $\text{cm}^{-1}$ .  $^1\text{H}$  NMR (400 MHz,  $\text{CDCl}_3$ ):  $\delta$  2.26 (s, 3H), 6.02 (s, 1H), 6.76 (d,  $J = 8.4$  Hz, 2H), 7.06 (d,  $J = 7.2$  Hz, 2H), 7.23 (d,  $J = 8.8$  Hz, 1H), 7.31 (d,  $J = 7.6$  Hz, 3H), 7.36 (s,  $J = 7.2$  Hz, 3H), 7.53 (t,  $J = 8.0$  Hz, 1H), 7.93 (d,  $J = 8.0$  Hz, 1H), 10.57 (s, 1H, OH) ppm;  $^{13}\text{C}$  NMR (100 MHz,  $\text{CDCl}_3$ ):  $\delta$  21.3, 50.0, 102.6, 116.1, 116.2 (2C), 116.3, 116.6, 123.7, 124.4, 128.2, 128.5, 129.4 (2C), 130.4 (2C), 131.4 (2C), 132.6, 138.9, 152.7, 156.5, 163.5 ppm. HRMS (APCI): calcd for  $\text{C}_{23}\text{H}_{18}\text{O}_4\text{S}$   $[\text{M} + \text{H}]^+$ : 391.0999; Found 391.0998.

**4-hydroxy-3-((4-methoxyphenyl)(p-tolylthio)methyl)-2H-chromen-2-one (18a):** Yield: (300 mg, 74%); White solid; mp 142-144 °C. IR (KBr): 3078, 2959, 2837, 1693, 1629, 1604, 1573, 1510, 1493, 1453, 1443, 1364, 1334, 1306, 1279, 1257, 1213, 1180, 1164, 1148, 1111, 1091, 1044, 1033, 936, 896, 837, 817, 807, 792, 765, 749, 739, 701, 690, 671  $\text{cm}^{-1}$ .  $^1\text{H}$  NMR (400 MHz,  $\text{CDCl}_3$ ):  $\delta$  2.27 (s, 3H), 3.80 (s, 3H), 6.07 (s, 1H), 6.88 (d,  $J = 8.0$  Hz, 2H), 7.07 (d,  $J = 7.2$  Hz, 2H), 7.24 (d,  $J = 8.4$  Hz, 1H), 7.30 (d,  $J = 7.2$  Hz, 1H), 7.37 (d,  $J = 7.6$  Hz, 2H), 7.43 (d,  $J = 7.6$  Hz, 2H), 7.53 (t,  $J = 8.0$  Hz, 1H), 7.93 (d,  $J = 8.0$  Hz, 1H), 10.46 (s, 1H, OH) ppm.  $^{13}\text{C}$  NMR (100 MHz,  $\text{CDCl}_3$ ):  $\delta$  21.2, 49.7, 55.4, 102.6, 114.5 (2C), 116.1, 116.5, 123.5, 124.1, 128.5, 128.9, 129.3 (2C), 130.4 (2C), 131.4 (2C), 132.4, 138.8, 152.8, 159.6, 162.7, 162.9 ppm. HRMS (APCI): calcd for  $\text{C}_{24}\text{H}_{20}\text{O}_4\text{S}$   $[\text{M} + \text{K}]^+$ : 443.0714; Found 443.0725.

**3-((4-chlorophenyl)(p-tolylthio)methyl)-4-hydroxy-2H-chromen-2-one (19a):** Yield: (315 mg, 77%); White solid; mp 138-140 °C. IR (KBr): 3155, 2922, 1892, 1682, 1619, 1567, 1492, 1450, 1393, 1340, 1282, 1199, 1161, 1146, 1108, 1088, 1061, 1013, 896, 815, 804, 765, 754, 733, 680 cm<sup>-1</sup>. <sup>1</sup>H NMR (400 MHz, CDCl<sub>3</sub>): δ 2.27 (s, 3H), 6.04 (s, 1H), 7.08 (d, *J* = 7.6 Hz, 2H), 7.24 (d, *J* = 8.8 Hz, 1H), 7.32 (d, *J* = 8.0 Hz, 3H), 7.37 (d, *J* = 7.6 Hz, 2H), 7.44 (d, *J* = 8.4 Hz, 2H), 7.54 (t, *J* = 8.0 Hz, 1H), 7.93 (d, *J* = 8.0 Hz, 1H), 10.42 (s, 1H, OH) ppm. <sup>13</sup>C NMR (100 MHz, CDCl<sub>3</sub>): δ 21.3, 49.8, 102.1, 116.0, 116.7, 123.7, 124.2, 128.0, 129.4 (2C), 129.5 (2C), 130.5 (2C), 131.6 (2C), 132.7, 134.4, 135.7, 139.2, 152.9, 162.6, 163.2 ppm. HRMS (APCI): calcd for C<sub>23</sub>H<sub>17</sub>ClO<sub>3</sub>S [M + K]<sup>+</sup>: 447.0219; Found 447.0221.

**3-((4-bromophenyl)(p-tolylthio)methyl)-4-hydroxy-2H-chromen-2-one (20a):** Yield: (280 mg, 79%); White solid; mp 143-145 °C. IR (KBr): 3493, 3160, 2961, 2919, 2852, 1682, 1619, 1566, 1493, 1449, 1395, 1339, 1281, 1198, 1161, 1145, 1108, 1061, 1009, 896, 804, 764, 754, 731, 684, 668 cm<sup>-1</sup>. <sup>1</sup>H NMR (400 MHz, CDCl<sub>3</sub>): δ 2.28 (s, 3H), 6.03 (s, 1H), 7.09 (d, *J* = 7.6 Hz, 2H), 7.25 (d, *J* = 8.4 Hz, 1H), 7.32 (t, *J* = 7.2 Hz, 1H), 7.38 (d, *J* = 8.0 Hz, 4H), 7.48 (d, *J* = 7.6 Hz, 2H), 7.55 (t, *J* = 7.6 Hz, 1H), 7.93 (d, *J* = 7.6 Hz, 1H), 10.42 (s, 1H, OH) ppm. <sup>13</sup>C NMR (100 MHz, CDCl<sub>3</sub>): δ 21.2, 49.7, 102.0, 115.9, 116.5, 122.4, 123.5, 124.2, 128.0, 129.7 (2C), 130.4 (2C), 131.5 (2C), 132.2 (2C), 132.6, 136.2, 139.1, 152.8, 162.6, 163.1 ppm. HRMS (ESI): calcd for C<sub>23</sub>H<sub>17</sub>BrO<sub>3</sub>S [M + H]<sup>+</sup>: 455.0136; Found 455.0144.

**3-((4-fluorophenyl)(p-tolylthio)methyl)-4-hydroxy-2H-chromen-2-one (21a):** Yield: (271 mg, 69%); White solid; mp 79-80 °C. IR (KBr): 3447, 3071, 2953, 2922, 2858, 1925, 1686, 1624, 1573, 1507, 1494, 1454, 1381, 1279, 1250, 1234, 1211, 1160, 1108, 1040, 1015, 942, 929, 896, 853, 819, 799, 767, 751, 716, 671 cm<sup>-1</sup>. <sup>1</sup>H NMR (400 MHz, CDCl<sub>3</sub>): δ 2.27 (s, 3H), 6.06 (s, 1H), 7.03 (t, *J* = 8.4 Hz, 2H), 7.08 (d, *J* = 8.4 Hz, 2H), 7.24 (d, *J* = 9.6 Hz, 1H),

7.31 (t,  $J = 7.6$  Hz, 1H), 7.37 (d,  $J = 8.4$  Hz, 2H), 7.48 (dd,  $J_1 = 8.4$  Hz &  $J_2 = 8.8$  Hz, 2H), 7.54 (t,  $J = 8.0$  Hz, 1H), 7.93 (d,  $J = 8.0$  Hz, 1H), 10.47 (s, 1H, OH). ppm.  $^{13}\text{C}$  NMR (100 MHz,  $\text{CDCl}_3$ ):  $\delta$  21.2, 49.6, 102.3, 115.9, 116.0, 116.2, 116.6, 123.6, 124.2, 128.1, 129.8, 129.9, 130.4, 131.5, 132.6, 132.9, 133.0, 139.1, 152.8, 161.3, 162.6, 163.1, 163.8 ppm. HRMS (APCI): calcd for  $\text{C}_{23}\text{H}_{17}\text{FO}_3\text{S}$   $[\text{M} + \text{K}]^+$ : 431.0514; Found 431.0518.

**4-hydroxy-3-((4-nitrophenyl)(p-tolylthio)methyl)-2H-chromen-2-one (22a)**: Yield: (340 mg, 81%); White solid; mp 201-203 °C. IR (KBr): 3471, 3162, 2919, 2847, 1678, 1620, 1566, 1518, 1495, 1451, 1401, 1344, 1280, 1220, 1190, 1166, 1148, 1109, 1072, 1012, 897, 854, 827, 806, 767, 759, 715, 673  $\text{cm}^{-1}$ .  $^1\text{H}$  NMR (400 MHz,  $\text{CDCl}_3$ ):  $\delta$  2.29 (s, 3H), 6.11 (s, 1H), 7.11 (d,  $J = 7.2$  Hz, 2H), 7.26 (d,  $J = 3.6$  Hz, 1H), 7.34 (t,  $J = 7.6$  Hz, 1H), 7.40 (d,  $J = 7.2$  Hz, 2H), 7.58 (t,  $J = 7.6$  Hz, 1H), 7.68 (d,  $J = 8.0$  Hz, 2H), 7.96 (d,  $J = 8.0$  Hz, 1H), 8.21 (d,  $J = 8.0$  Hz, 2H), 10.45 (s, 1H, OH) ppm.  $^{13}\text{C}$  NMR (100 MHz,  $\text{CDCl}_3$ ):  $\delta$  21.3, 50.0, 101.4, 115.9, 116.7, 123.7, 124.3 (2C), 124.4, 127.4, 129.2 (2C), 130.7 (2C), 131.9 (2C), 133.0, 139.7, 144.7, 147.8, 152.9, 162.6, 163.5 ppm. HRMS (APCI): calcd for  $\text{C}_{23}\text{H}_{17}\text{NO}_5\text{S}$   $[\text{M} + \text{H}]^+$ : 420.0900; Found 420.0901.

**3-((2-chlorophenyl)(p-tolylthio)methyl)-4-hydroxy-2H-chromen-2-one (23a)**: Yield: (254 mg, 62%); White solid; mp 197-199 °C. IR (KBr): 3173, 2964, 2919, 2855, 1668, 1627, 1568, 1496, 1465, 1452, 1437, 1404, 1343, 1292, 1269, 1231, 1192, 1163, 1151, 1114, 1058, 1046, 1034, 1017, 955, 939, 896, 867, 850, 807, 764, 750, 738, 697, 682, 643  $\text{cm}^{-1}$ .  $^1\text{H}$  NMR (400 MHz,  $\text{CDCl}_3$ ):  $\delta$  2.30 (s, 3H), 6.29 (s, 1H), 7.12 (d,  $J = 7.6$  Hz, 2H), 7.20 (t,  $J = 7.6$  Hz, 1H), 7.25-7.27 (m, 2H), 7.34 (t,  $J = 8.0$  Hz, 2H), 7.46-7.49 (m, 3H), 7.58 (t,  $J = 8.0$  Hz, 1H), 8.00 (d,  $J = 8.0$  Hz, 1H), 11.06 (s, 1H, OH) ppm.  $^{13}\text{C}$  NMR (100 MHz,  $\text{CDCl}_3$ ):  $\delta$  21.3, 49.2, 101.5, 116.2, 116.7, 123.7, 124.2, 127.5, 128.3, 128.7, 129.9, 130.6 (2C), 130.7, 132.0 (2C),

132.7, 134.7, 134.8, 139.5, 153.0, 162.3, 163.8 ppm. HRMS (ESI): calcd for C<sub>23</sub>H<sub>17</sub>ClO<sub>3</sub>S [M + H]<sup>+</sup>: 409.0660; Found 409.0667.

**4-hydroxy-3-((2-nitrophenyl)(p-tolylthio)methyl)-2H-chromen-2-one (24a):** Yield: (273 mg, 65%); White solid; mp 170-172 °C. IR (KBr): 3174, 2919, 2861, 1667, 1630, 1619, 1565, 1525, 1497, 1475, 1451, 1404, 1349, 1292, 1267, 1231, 1212, 1190, 1164, 1150, 1113, 1081, 1059, 1033, 1017, 941, 921, 897, 878, 858, 828, 808, 788, 761, 749, 735, 716, 678 cm<sup>-1</sup>. <sup>1</sup>H NMR (400 MHz, CDCl<sub>3</sub>): δ 2.23 (s, 3H), 6.60 (s, 1H), 7.06 (d, *J* = 7.6 Hz, 2H), 7.18 (d, *J* = 7.2 Hz, 1H), 7.27 (t, *J* = 7.2 Hz, 1H), 7.38-7.45 (m, 4H), 7.49 (t, *J* = 8.0 Hz, 2H), 7.93 (d, *J* = 8.4 Hz, 1H), 7.97 (d, *J* = 8.0 Hz, 1H), 11.09 (s, 1H, OH) ppm. <sup>13</sup>C NMR (100 MHz, CDCl<sub>3</sub>): δ 21.4, 47.6, 101.3, 116.0, 116.7, 123.8, 124.3, 126.0, 127.5, 129.4, 129.5, 130.7 (2C), 132.5 (2C), 132.6, 132.9, 133.7, 140.0, 148.8, 153.1, 162.2, 163.9 ppm. HRMS (ESI): calcd for C<sub>23</sub>H<sub>17</sub>NO<sub>5</sub>S [M + H]<sup>+</sup>: 420.0900; Found 420.0904.

**3-((2,4-dimethoxyphenyl)(p-tolylthio)methyl)-4-hydroxy-2H-chromen-2-one (25a):** Yield: (305 mg, 70%); White solid; mp 122-123 °C. IR (KBr): 3213, 2919, 2836, 2359, 2332, 1671, 1621, 1606, 1567, 1495, 1457, 1438, 1399, 1345, 1293, 1204, 1191, 1178, 1163, 1102, 1074, 1031, 938, 917, 894, 840, 820, 757, 680 cm<sup>-1</sup>. <sup>1</sup>H NMR (400 MHz, CDCl<sub>3</sub>): δ 2.27 (s, 3H), 3.79 (s, 3H), 3.95 (s, 3H), 6.16 (s, 1H), 6.44 (d, *J* = 8.0 Hz, 1H), 6.51 (s, 1H), 7.07 (d, *J* = 7.2 Hz, 2H), 7.22-7.32 (m, 3H), 7.38 (d, *J* = 8.0 Hz, 2H), 7.51 (t, *J* = 8.4 Hz, 1H), 7.94 (d, *J* = 7.6 Hz, 1H), 10.77 (s, 1H, OH) ppm. <sup>13</sup>C NMR (100 MHz, CDCl<sub>3</sub>): δ 21.1, 46.0, 55.4, 55.9, 99.3, 102.5, 104.8, 116.3, 118.1, 123.5, 123.9, 129.7, 129.8, 130.1 (2C), 131.3 (2C), 132.1, 132.4, 138.3, 152.6, 158.0, 161.1, 162.5, 162.7 ppm. HRMS (ESI): calcd for C<sub>25</sub>H<sub>22</sub>O<sub>5</sub>S [M + K]<sup>+</sup>: 473.0820; Found 473.0827.

**4-hydroxy-3-(naphthalen-2-yl(p-tolylthio)methyl)-2H-chromen-2-one (26a):** Yield: (336 mg, 79%); White solid; mp 114-116 °C. IR (KBr): 3445, 3052, 2921, 2854, 1693, 1662,

1621, 1567, 1492, 1453, 1395, 1331, 1281, 1207, 1105, 1037, 896, 858, 808, 761, 669  $\text{cm}^{-1}$ .  $^1\text{H}$  NMR (400 MHz,  $\text{CDCl}_3$ ):  $\delta$  2.28 (s, 3H), 6.26 (s, 1H), 7.09 (d,  $J = 7.6$  Hz, 2H), 7.25 (s, 1H), 7.32 (t,  $J = 7.6$  Hz, 1H), 7.42 (d,  $J = 7.6$  Hz, 2H), 7.46-7.47 (m, 2H), 7.54 (t,  $J = 8.0$  Hz, 1H), 7.66 (d,  $J = 8.4$  Hz, 1H), 7.80-7.86 (m, 3H), 7.89 (s, 1H), 7.97 (d,  $J = 7.6$  Hz, 1H), 10.47 (s, 1H, OH) ppm.  $^{13}\text{C}$  NMR (100 MHz,  $\text{CDCl}_3$ ):  $\delta$  21.3, 50.6, 102.4, 116.2, 116.6, 123.7, 124.2, 126.2, 126.5, 126.6, 126.8, 127.8, 128.2, 128.4, 129.1, 130.5 (2C), 131.6 (2C), 132.6, 133.2, 133.5, 134.5, 139.0, 152.9, 162.8, 163.2 ppm. HRMS (APCI): calcd for  $\text{C}_{27}\text{H}_{20}\text{O}_3\text{S}$  [ $\text{M} + \text{K}$ ] $^+$ : 463.0765; Found 463.0755.

***3-(((4-bromophenyl)thio)(4-methoxyphenyl)methyl)-4-hydroxy-2H-chromen-2-one (27a):***

Yield: (334 mg, 71%); White solid; mp 230-232  $^{\circ}\text{C}$ . IR (KBr): 3438, 3074, 2837, 2734, 2616, 1670, 1615, 1604, 1564, 1510, 1453, 1353, 1308, 1280, 1258, 1219, 1178, 1162, 1093, 1053, 1034, 1009, 960, 920, 906, 895, 827, 811, 798, 787, 769, 674  $\text{cm}^{-1}$ .  $^1\text{H}$  NMR (400 MHz,  $\text{CDCl}_3$ ):  $\delta$  3.79 (s, 3H), 6.15 (s, 1H), 6.88 (d,  $J = 8.8$  Hz, 2H), 7.25-7.28 (m, 1H), 7.32 (d,  $J = 8.4$  Hz, 3H), 7.41 (t,  $J = 9.2$  Hz, 4H), 7.55 (t,  $J = 8.4$  Hz, 1H), 7.89 (d,  $J = 7.6$  Hz, 1H), 10.03 (s, 1H, OH) ppm.  $^{13}\text{C}$  NMR (100 MHz,  $\text{CDCl}_3$ ):  $\delta$  48.9, 55.5, 102.3, 114.7 (2C), 115.9, 116.7, 122.6, 123.6, 124.3, 128.2, 129.4 (2C), 131.5, 132.2 (3C), 132.7 (2C), 152.8, 159.8, 162.7, 162.9 ppm. HRMS (ESI): calcd for  $\text{C}_{23}\text{H}_{17}\text{BrO}_4\text{S}$  [ $\text{M} + \text{K}$ ] $^+$ : 508.9644; Found 508.9628.

***4-(((4-chlorophenyl)thio)(4-hydroxy-2-oxo-2H-chromen-3-yl)methyl)benzotrile (28a):***

Yield: (328 mg, 78%); White solid; mp 110-112  $^{\circ}\text{C}$ . IR (KBr): 3157, 2229, 1678, 1621, 1607, 1566, 1498, 1476, 1451, 1395, 1345, 1279, 1221, 1198, 1167, 1149, 1108, 1093, 1076, 1023, 1011, 952, 922, 897, 860, 827, 820, 789, 770, 757, 743, 690  $\text{cm}^{-1}$ .  $^1\text{H}$  NMR (400 MHz,  $\text{CDCl}_3$ ):  $\delta$  6.11 (s, 1H), 7.21-7.23 (m, 3H), 7.29 (t,  $J = 7.6$  Hz, 2H), 7.37 (d,  $J = 8.8$  Hz, 2H), 7.54 (t,  $J = 8.4$  Hz, 1H), 7.60 (s, 3H), 7.90 (d,  $J = 8.0$  Hz, 1H) ppm.  $^{13}\text{C}$  NMR (100 MHz,  $\text{CDCl}_3 + \text{DMSO}$ ):  $\delta$  47.1, 104.7, 109.3, 115.1, 115.4, 117.8, 122.9, 128.0 (5C), 130.7 (3C),

130.8 (2C), 131.4, 134.5, 145.0, 151.6, 160.6, 160.9 ppm. HRMS (ESI): calcd for  $C_{23}H_{14}ClNO_3S$   $[M + K]^+$ : 458.0015; Found 458.0015.

**3-((benzylthio)(thiophen-2-yl)methyl)-4-hydroxy-2H-chromen-2-one (29a):** Yield: (278 mg, 73%); Light green solid; mp 178-180 °C. IR (KBr): 3235, 3070, 2924, 2854, 1723, 1679, 1664, 1621, 1609, 1551, 1495, 1463, 1450, 1401, 1387, 1339, 1306, 1249, 1212, 1193, 1164, 1110, 1068, 1028, 892, 863, 804, 763, 747, 698  $cm^{-1}$ .  $^1H$  NMR (400 MHz,  $CDCl_3$ ):  $\delta$  3.86 (s, 2H), 5.90 (s, 1H), 6.88 (t,  $J = 4.0$  Hz, 1H), 6.98 (d,  $J = 2.4$  Hz, 1H), 7.12 (d,  $J = 5.6$  Hz, 1H), 7.20 (d,  $J = 4.8$  Hz, 1H), 7.24 (t,  $J = 6.0$  Hz, 3H), 7.31 (t,  $J = 7.6$  Hz, 3H), 7.57 (t,  $J = 7.6$  Hz, 1H), 7.87 (d,  $J = 8.0$  Hz, 1H), 10.03 (s, 1H, OH) ppm.  $^{13}C$  NMR (100 MHz,  $CDCl_3$ ):  $\delta$  37.5, 40.8, 102.2, 115.8, 116.4, 123.5, 124.1, 125.7, 126.2, 126.9, 127.6, 128.7 (2C), 128.8 (2C), 132.6, 135.8, 140.6, 152.8, 162.2, 162.9 ppm. HRMS (ESI): calcd for  $C_{21}H_{16}O_3S_2$   $[M + K]^+$ : 419.0172; Found 419.0172.

**3-((ethylthio)(pyridin-2-yl)methyl)-4-hydroxy-2H-chromen-2-one (30a):** Yield: (236 mg, 75%); White solid; mp 97-99 °C. IR (KBr): 3446, 3067, 2980, 2970, 2930, 2919, 2872, 2853, 1684, 1630, 1613, 1596, 1578, 1488, 1453, 1434, 1382, 1368, 1329, 1298, 1278, 1263, 1199, 1186, 1165, 1108, 1052, 1034, 1012, 944, 901, 864, 805, 779, 769, 760, 705, 675  $cm^{-1}$ .  $^1H$  NMR (400 MHz,  $CDCl_3$ ):  $\delta$  1.23 (t,  $J = 7.6$  Hz, 3H), 2.52-2.57 (m, 2H), 5.87 (s, 1H), 7.26 (d,  $J = 5.6$  Hz, 2H), 7.39 (s, 1H), 7.50 (t,  $J = 8.0$  Hz, 1H), 7.57 (d,  $J = 7.2$  Hz, 1H), 7.89 (t,  $J = 7.6$  Hz, 1H), 8.01 (d,  $J = 7.6$  Hz, 1H), 8.53 (s, 1H) ppm.  $^{13}C$  NMR (100 MHz,  $CDCl_3$ ):  $\delta$  14.6, 26.9, 46.3, 101.9, 116.4, 118.0, 123.7, 124.0, 124.4, 124.5, 132.4, 140.2, 146.2, 152.9, 159.5, 164.1, 165.7 ppm. HRMS (ESI): calcd for  $C_{17}H_{15}NO_3S$   $[M + H]^+$ : 314.0845; Found 314.0845.



**<sup>1</sup>H NMR (400 MHz, CDCl<sub>3</sub>): 3-((ethylthio)(phenyl)methyl)-4-hydroxy-2H-chromen-2-one (1a)**

AD\_DD\_24\_1H

Sample Name:  
AD\_DD\_24\_1H  
Data Collected on:  
IITG-NMR-mercury400  
Archive directory:  
/export/home/chempack/vnmrsys/data  
Sample directory:

FidFile: AD\_DD\_24\_1H

Pulse Sequence: PROTON (s2pul)  
Solvent: cdcl3  
Data collected on: May 8 2014

Temp. 25.0 C / 298.1 K  
Operator: chem

Relax. delay 1.000 sec  
Pulse 45.0 degrees  
Acq. time 2.561 sec  
Width 6398.0 Hz  
64 repetitions  
OBSERVE H1, 399.8509634 MHz  
DATA PROCESSING  
FT size 32768  
Total time 4 min 24 sec

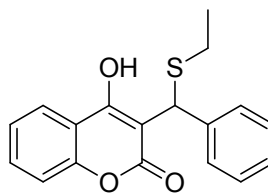

(1a)

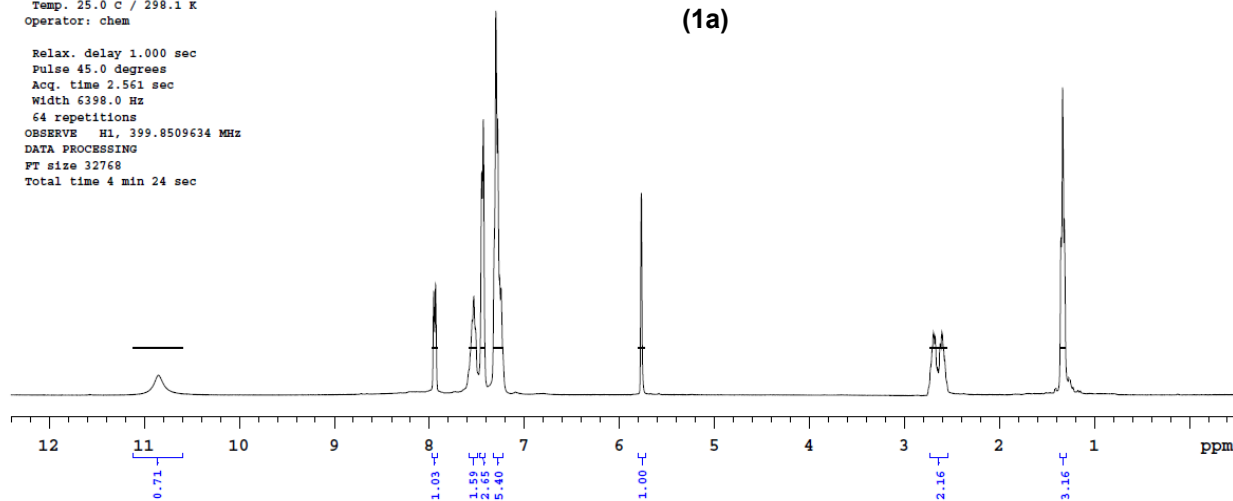

**<sup>13</sup>C NMR (100 MHz, CDCl<sub>3</sub>): 3-((ethylthio)(phenyl)methyl)-4-hydroxy-2H-chromen-2-one (1a)**

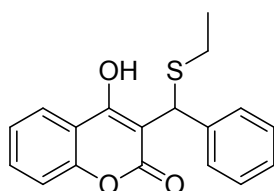

(1a)

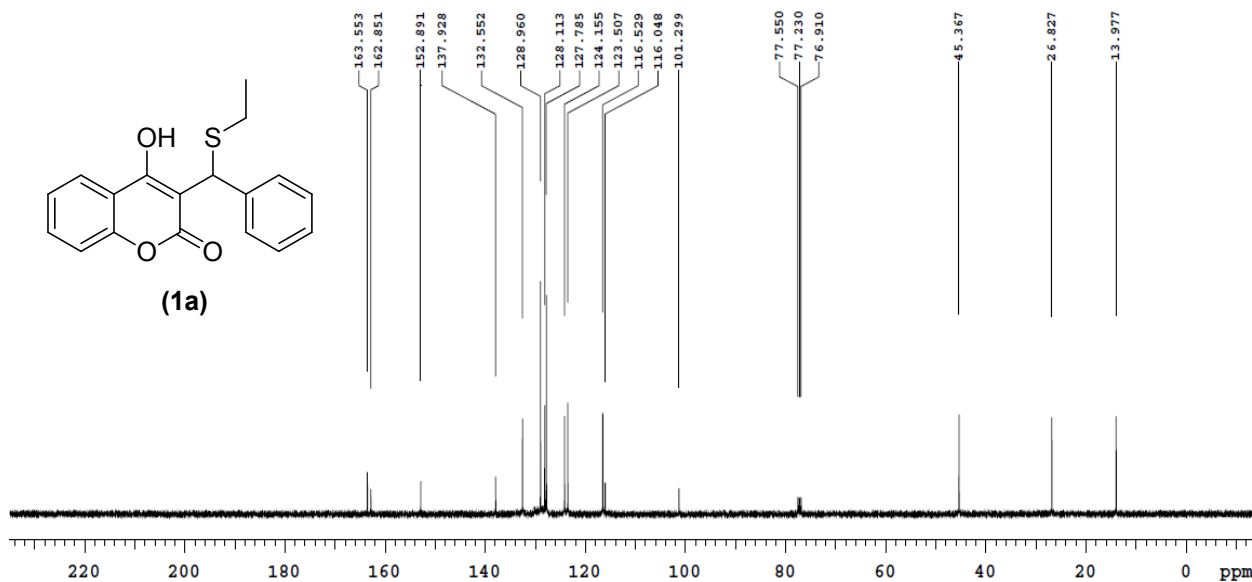

|                                                                                                                                          |                                                                                                                         |                                                                                               |                                                                                                                 |
|------------------------------------------------------------------------------------------------------------------------------------------|-------------------------------------------------------------------------------------------------------------------------|-----------------------------------------------------------------------------------------------|-----------------------------------------------------------------------------------------------------------------|
| <p>PULSE SEQUENCE<br/>Relax. delay 1.000 sec<br/>Pulse 45.0 degrees<br/>Acq. time 1.304 sec<br/>Width 25125.6 Hz<br/>805 repetitions</p> | <p>OBSERVE C13, 100.5426031<br/>DECOUPLE H1, 399.8529994<br/>Power 42 dB<br/>continuously on<br/>WALTZ-16 modulated</p> | <p>DATA PROCESSING<br/>Line broadening 0.5 Hz<br/>FT size 65536<br/>Total time 30 minutes</p> | <p>AD_DD_24_13C<br/>Solvent: cdcl3<br/>Temp. 25.0 C / 298.1 K<br/>Operator: chem<br/>Mercury-400 *IITG-NMR*</p> |
|------------------------------------------------------------------------------------------------------------------------------------------|-------------------------------------------------------------------------------------------------------------------------|-----------------------------------------------------------------------------------------------|-----------------------------------------------------------------------------------------------------------------|

<sup>1</sup>H NMR (400 MHz, CDCl<sub>3</sub>): 4-hydroxy-3-(phenyl(propylthio)methyl)-2H-chromen-2-one (2a)

AD\_DD\_16\_1H  
 Sample Name:  
 AD\_DD\_16\_1H  
 Data Collected on:  
 IITG-NMR-mercury400  
 Archive directory:  
 /export/home/chempack/vnmrsys/data  
 Sample directory:  
 FIDFile: AD\_DD\_16\_1H  
 Pulse Sequence: PROTON (s2pul)  
 Solvent: cdcl3  
 Data collected on: Jan 5 2015  
 Temp. 25.0 C / 298.1 K  
 Operator: chem  
 Relax. delay 1.000 sec  
 Pulse 45.0 degrees  
 Acq. time 2.561 sec  
 Width 6398.0 Hz  
 64 repetitions  
 OBSERVE H1, 399.8509634 MHz  
 DATA PROCESSING  
 FT size 32768  
 Total time 4 min 24 sec

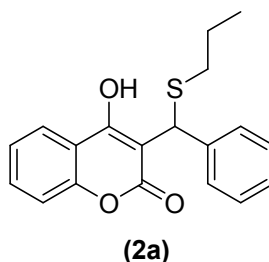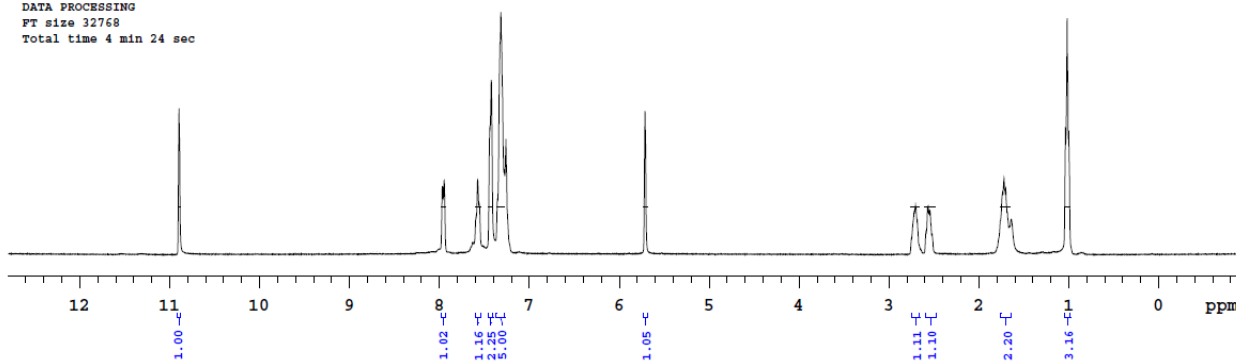

<sup>13</sup>C NMR (100 MHz, CDCl<sub>3</sub>): 4-hydroxy-3-(((2-hydroxyethyl)thio)(phenyl)methyl)-2H-chromen-2-one (2a)

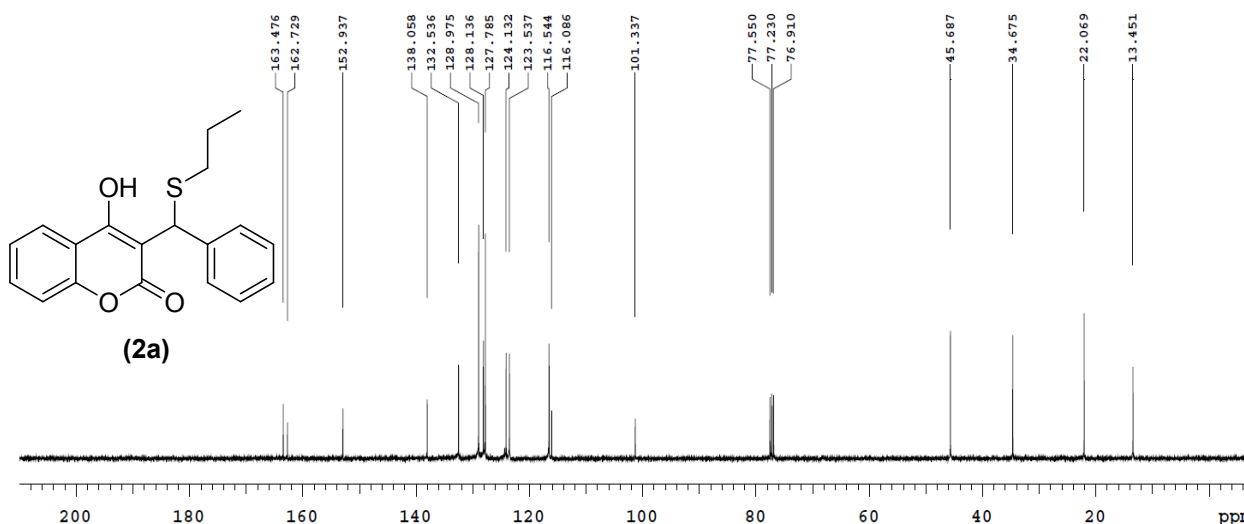

PULSE SEQUENCE  
 Relax. delay 1.000 sec  
 Pulse 45.0 degrees  
 Acq. time 1.304 sec  
 Width 25125.6 Hz  
 240 repetitions

OBSERVE C13, 100.5426024  
 DECOUPLE H1, 399.8529994  
 Power 42 dB  
 continuously on  
 WALTZ-16 modulated

DATA PROCESSING  
 Line broadening 0.5 Hz  
 FT size 65536  
 Total time 9 minutes

AD\_DD\_16\_13C

Solvent: cdcl3  
 Temp. 25.0 C / 298.1 K  
 Operator: chem  
 Mercury-400 \*IITG-NMR\*

**<sup>1</sup>H NMR (400 MHz, CDCl<sub>3</sub>): 3-((benzylthio)(phenyl)methyl)-4-hydroxy-2H-chromen-2-one (3a)**

AD\_DD\_8\_1H  
 Sample Name:  
 AD\_DD\_8\_1H  
 Data Collected on:  
 IITG-NMR-mercury400  
 Archive directory:  
 Sample directory:  
 Fidfile: PROTON  
 Pulse Sequence: PROTON (s2pul)  
 Solvent: cdcl3  
 Data collected on: May 23 2014  
 Temp. 25.0 C / 298.1 K  
 Operator: chem  
 Relax. delay 1.000 sec  
 Pulse 45.0 degrees  
 Acq. time 2.561 sec  
 Width 6398.0 Hz  
 32 repetitions  
 OBSERVE H1, 399.8509634 MHz  
 DATA PROCESSING  
 FT size 32768  
 Total time 2 min 12 sec

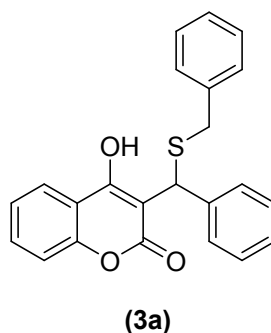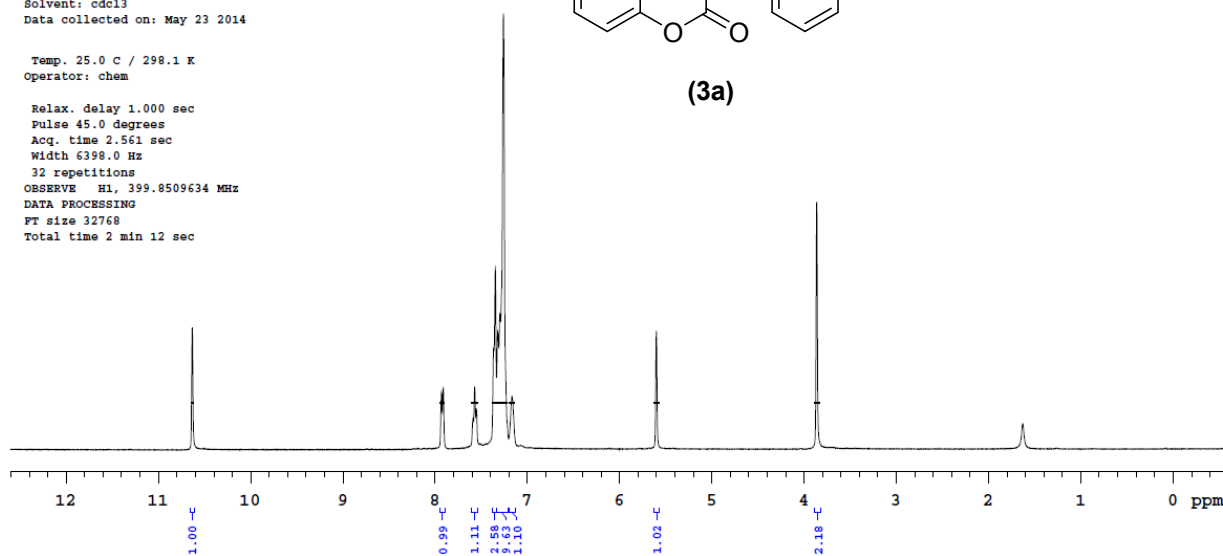

**<sup>13</sup>C NMR (100 MHz, CDCl<sub>3</sub>): 3-((benzylthio)(phenyl)methyl)-4-hydroxy-2H-chromen-2-one (3a)**

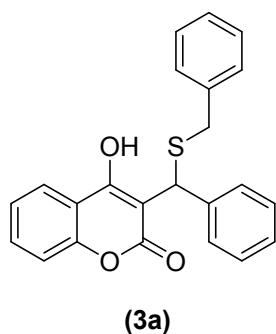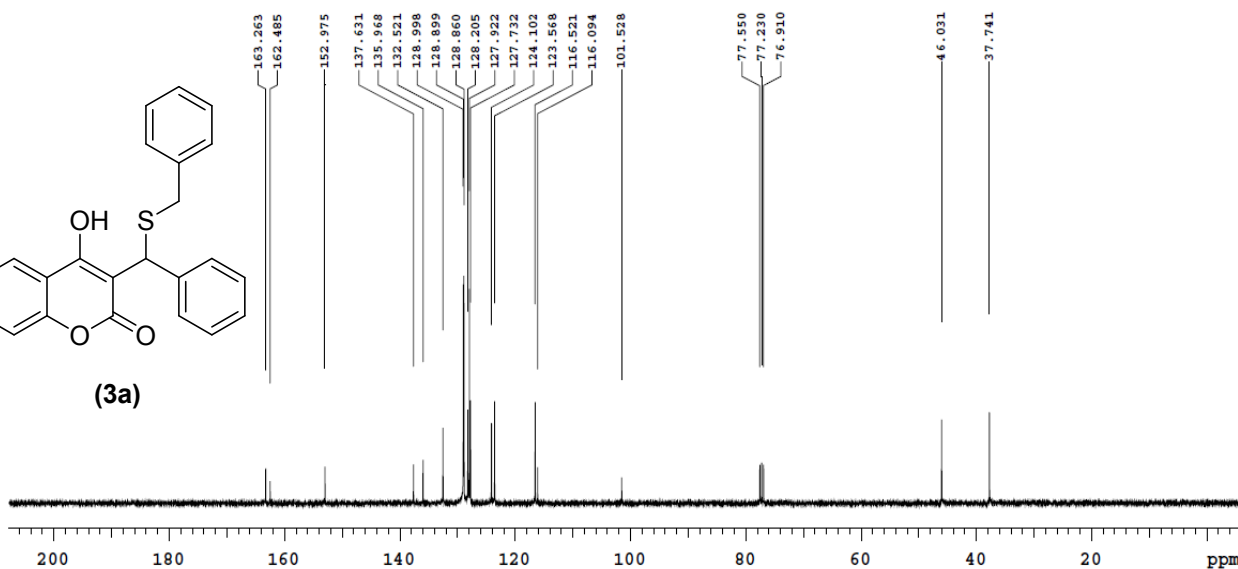

|                                                                                                                                     |                                                                                                                            |                                                                                            |                                                                                                            |
|-------------------------------------------------------------------------------------------------------------------------------------|----------------------------------------------------------------------------------------------------------------------------|--------------------------------------------------------------------------------------------|------------------------------------------------------------------------------------------------------------|
| <b>PULSE SEQUENCE</b><br>Relax. delay 1.000 sec<br>Pulse 45.0 degrees<br>Acq. time 1.304 sec<br>Width 25125.6 Hz<br>425 repetitions | <b>OBSERVE</b> C13, 100.5426001<br><b>DECOUPLE</b> H1, 399.8529994<br>Power 42 dB<br>continuously on<br>WALTZ-16 modulated | <b>DATA PROCESSING</b><br>Line broadening 0.5 Hz<br>FT size 65536<br>Total time 16 minutes | <b>AD_DD_8_13C</b><br>Solvent: cdcl3<br>Temp. 25.0 C / 298.1 K<br>Operator: chem<br>Mercury-400 *IITG-NMR* |
|-------------------------------------------------------------------------------------------------------------------------------------|----------------------------------------------------------------------------------------------------------------------------|--------------------------------------------------------------------------------------------|------------------------------------------------------------------------------------------------------------|

**<sup>1</sup>H NMR (400 MHz, CDCl<sub>3</sub>): 3-(((2-chlorobenzyl)thio)(phenyl)methyl)-4-hydroxy-2H-chromen-2-one (4a)**

AD\_DD\_30\_1H

Sample Name:  
AD\_DD\_30\_1H  
Data Collected on:  
IITG-NMR-mercury400  
Archive directory:  
/export/home/chempack/vnmrsvs/data  
Sample directory:

FidFile: AD\_DD\_30\_1H

Pulse Sequence: PROTON (s2pul)  
Solvent: cdcl3  
Data collected on: Mar 26 2015

Temp. 25.0 C / 298.1 K  
Operator: chem

Relax. delay 1.000 sec  
Pulse 45.0 degrees  
Acq. time 2.561 sec  
Width 6398.0 Hz  
64 repetitions  
OBSERVE H1, 399.8509634 MHz  
DATA PROCESSING  
FT size 32768  
Total time 4 min 24 sec

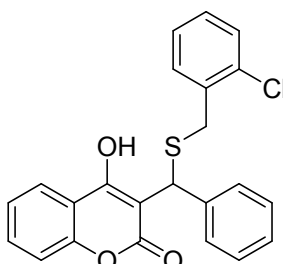

(4a)

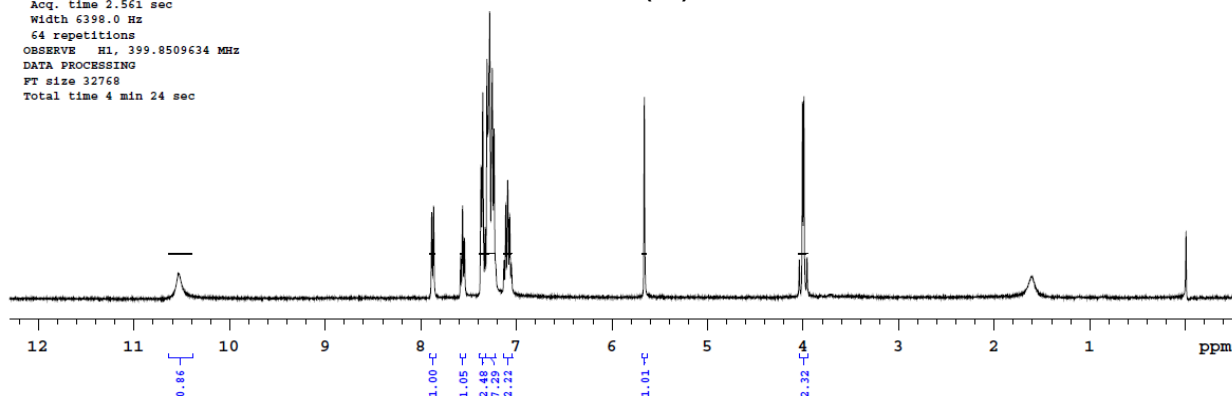

**<sup>13</sup>C NMR (100 MHz, CDCl<sub>3</sub>): 3-(((2-chlorobenzyl)thio)(phenyl)methyl)-4-hydroxy-2H-chromen-2-one (4a)**

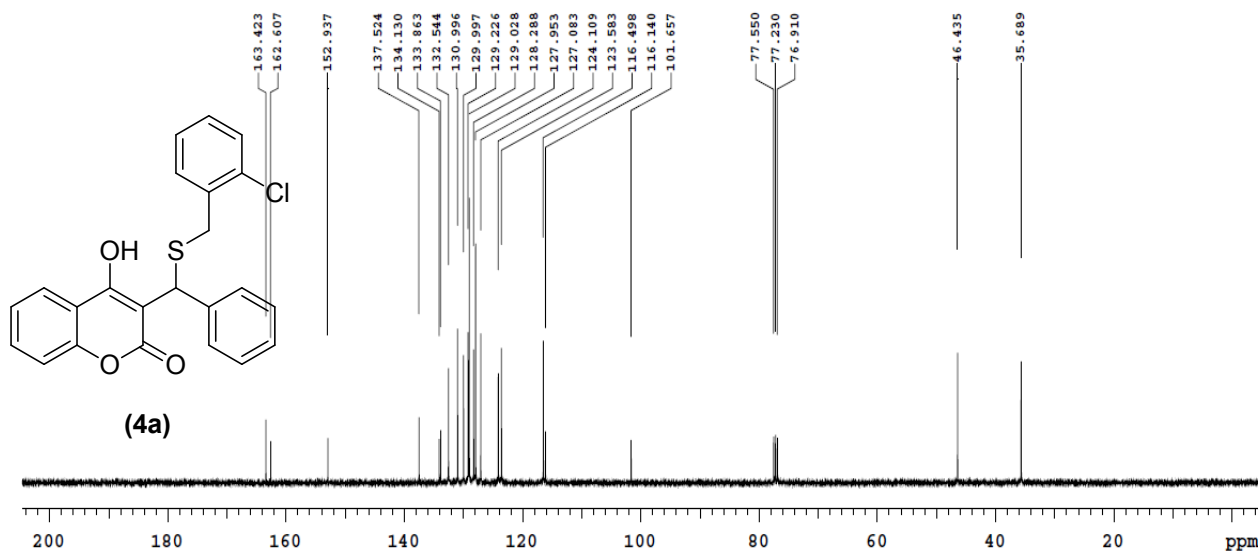

|                                                                                                                                          |                                                                                                                         |                                                                                               |                                                                                                                 |
|------------------------------------------------------------------------------------------------------------------------------------------|-------------------------------------------------------------------------------------------------------------------------|-----------------------------------------------------------------------------------------------|-----------------------------------------------------------------------------------------------------------------|
| <p>PULSE SEQUENCE<br/>Relax. delay 1.000 sec<br/>Pulse 45.0 degrees<br/>Acq. time 1.304 sec<br/>Width 25125.6 Hz<br/>460 repetitions</p> | <p>OBSERVE C13, 100.5425970<br/>DECOUPLE H1, 399.8529994<br/>Power 42 dB<br/>continuously on<br/>WALTZ-16 modulated</p> | <p>DATA PROCESSING<br/>Line broadening 0.5 Hz<br/>FT size 65536<br/>Total time 17 minutes</p> | <p>AD_DD_30_13C<br/>Solvent: cdcl3<br/>Temp. 25.0 C / 298.1 K<br/>Operator: chem<br/>Mercury-400 *IITG-NMR*</p> |
|------------------------------------------------------------------------------------------------------------------------------------------|-------------------------------------------------------------------------------------------------------------------------|-----------------------------------------------------------------------------------------------|-----------------------------------------------------------------------------------------------------------------|

**<sup>1</sup>H NMR (400 MHz, CDCl<sub>3</sub>): 4-hydroxy-3-(phenyl(propylthio)methyl)-2H-chromen-2-one (5a)**

AD\_DD\_18\_1H

Sample Name:  
AD\_DD\_18\_1H  
Data Collected on:  
IITG-NMR-mercury400  
Archive directory:

Sample directory:  
FidFile: AD\_DD\_18\_1H

Pulse Sequence: PROTON (s2pul)  
Solvent: cdcl3  
Data collected on: oct 3 2014

Temp. 25.0 C / 298.1 K  
Operator: chem

Relax. delay 1.000 sec  
Pulse 45.0 degrees  
Acq. time 2.561 sec  
Width 6398.0 Hz  
64 repetitions  
OBSERVE H1, 399.8509634 MHz  
DATA PROCESSING  
FT size 32768  
Total time 4 min 24 sec

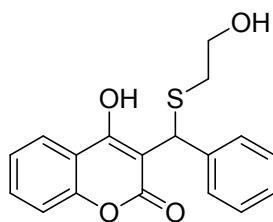

(5a)

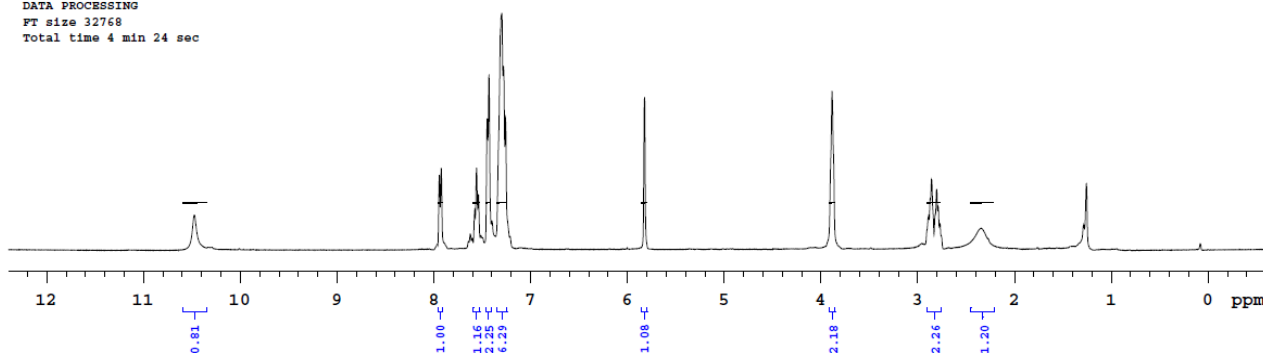

**<sup>13</sup>C NMR (100 MHz, CDCl<sub>3</sub>): 4-hydroxy-3-(phenyl(propylthio)methyl)-2H-chromen-2-one (5a)**

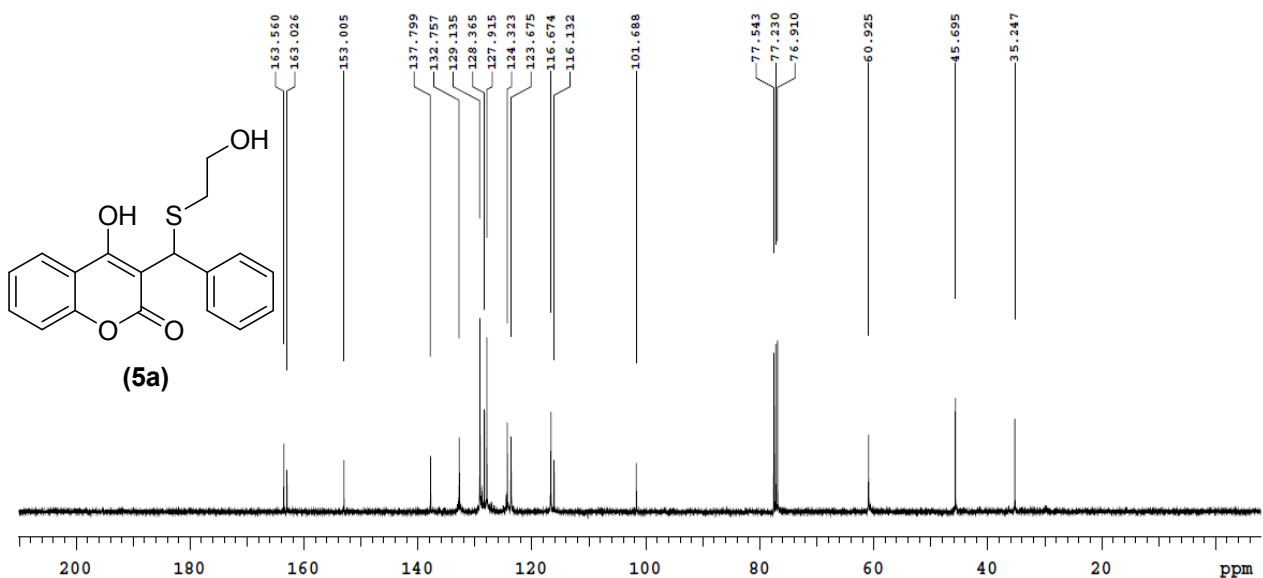

|                                                                                                                                           |                                                                                                                         |                                                                                               |                                                                                                                 |
|-------------------------------------------------------------------------------------------------------------------------------------------|-------------------------------------------------------------------------------------------------------------------------|-----------------------------------------------------------------------------------------------|-----------------------------------------------------------------------------------------------------------------|
| <p>PULSE SEQUENCE<br/>Relax. delay 1.000 sec<br/>Pulse 45.0 degrees<br/>Acq. time 1.304 sec<br/>Width 25125.6 Hz<br/>1888 repetitions</p> | <p>OBSERVE C13, 100.5425886<br/>DECOUPLE H1, 399.8529994<br/>Power 42 dB<br/>continuously on<br/>WALTZ-16 modulated</p> | <p>DATA PROCESSING<br/>Line broadening 0.5 Hz<br/>FT size 65536<br/>Total time 72 minutes</p> | <p>AD_DD_18_13c<br/>Solvent: cdcl3<br/>Temp. 25.0 C / 298.1 K<br/>Operator: chem<br/>Mercury-400 *IITG-NMR*</p> |
|-------------------------------------------------------------------------------------------------------------------------------------------|-------------------------------------------------------------------------------------------------------------------------|-----------------------------------------------------------------------------------------------|-----------------------------------------------------------------------------------------------------------------|

**<sup>1</sup>H NMR (400 MHz, CDCl<sub>3</sub>): 4-hydroxy-3-(phenyl(phenylthio)methyl)-2H-chromen-2-one (6a)**

AD\_DD\_9\_1H  
 Sample Name:  
 AD\_DD\_9\_1H  
 Data Collected on:  
 IITG-NMR-mercury400  
 Archive directory:  
 Sample directory:  
 FidFile: PROTON  
 Pulse Sequence: PROTON (s2pul)  
 Solvent: cdcl3  
 Data collected on: May 28 2014  
 Temp. 25.0 C / 298.1 K  
 Operator: chem  
 Relax. delay 1.000 sec  
 Pulse 45.0 degrees  
 Acq. time 2.561 sec  
 Width 6398.0 Hz  
 64 repetitions  
 OBSERVE H1, 399.8509634 MHz  
 DATA PROCESSING  
 FT size 32768  
 Total time 4 min 24 sec

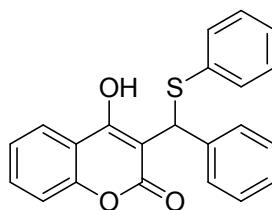

**(6a)**

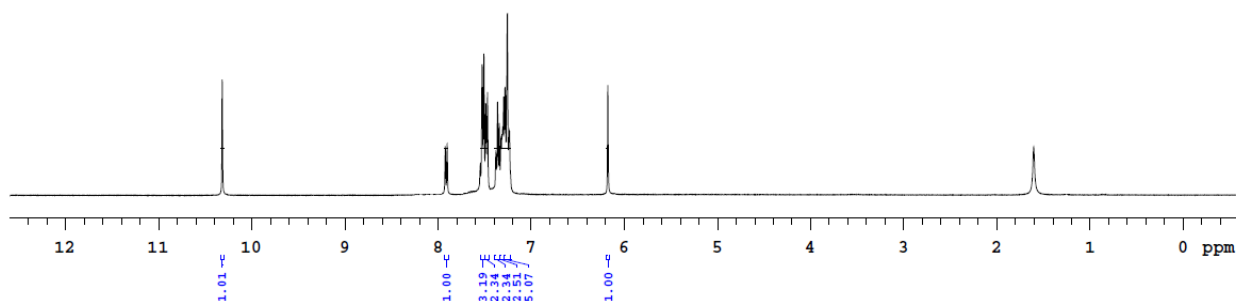

**<sup>13</sup>C NMR (100 MHz, CDCl<sub>3</sub>): 4-hydroxy-3-(phenyl(phenylthio)methyl)-2H-chromen-2-one (6a)**

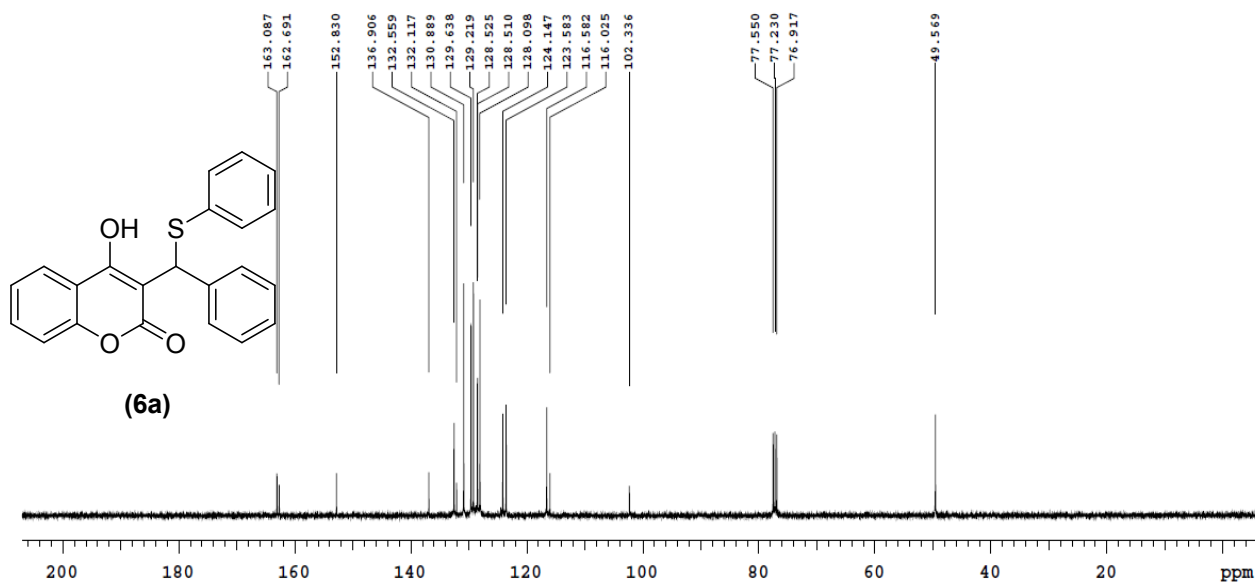

|                                                                                                                                     |                                                                                                                     |                                                                                            |                                                                                                            |
|-------------------------------------------------------------------------------------------------------------------------------------|---------------------------------------------------------------------------------------------------------------------|--------------------------------------------------------------------------------------------|------------------------------------------------------------------------------------------------------------|
| <b>PULSE SEQUENCE</b><br>Relax. delay 1.000 sec<br>Pulse 45.0 degrees<br>Acq. time 1.304 sec<br>Width 25125.6 Hz<br>452 repetitions | <b>OBSERVE C13, 100.5425955</b><br>DECOUPLE H1, 399.8529994<br>Power 42 dB<br>continuously on<br>WALTZ-16 modulated | <b>DATA PROCESSING</b><br>Line broadening 0.5 Hz<br>FT size 65536<br>Total time 17 minutes | <b>AD_DD_9_13C</b><br>Solvent: cdcl3<br>Temp. 25.0 C / 298.1 K<br>Operator: chem<br>Mercury-400 "IITG-NMR" |
|-------------------------------------------------------------------------------------------------------------------------------------|---------------------------------------------------------------------------------------------------------------------|--------------------------------------------------------------------------------------------|------------------------------------------------------------------------------------------------------------|

**<sup>1</sup>H NMR (400 MHz, CDCl<sub>3</sub>): 4-hydroxy-3-(((4-methoxyphenyl)thio)(phenyl)methyl)-2H-chromen-2-one (7a)**

AD\_DD\_11\_1H  
 Sample Name:  
 AD\_DD\_11\_1H  
 Data Collected on:  
 IITG-NMR-mercury400  
 Archive directory:  
 Sample directory:  
 Fidfile: PROTON  
 Pulse Sequence: PROTON (s2pul)  
 Solvent: cdcl3  
 Data collected on: May 19 2014  
 Temp. 25.0 c / 298.1 K  
 Operator: chem  
 Relax. delay 1.000 sec  
 Pulse 45.0 degrees  
 Acq. time 2.561 sec  
 Width 6398.0 Hz  
 64 repetitions  
 OBSERVE H1, 399.8509634 MHz  
 DATA PROCESSING  
 FT size 32768  
 Total time 4 min 24 sec

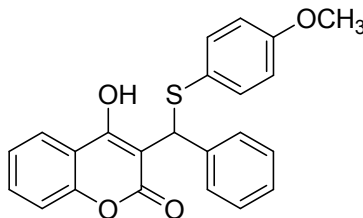

(7a)

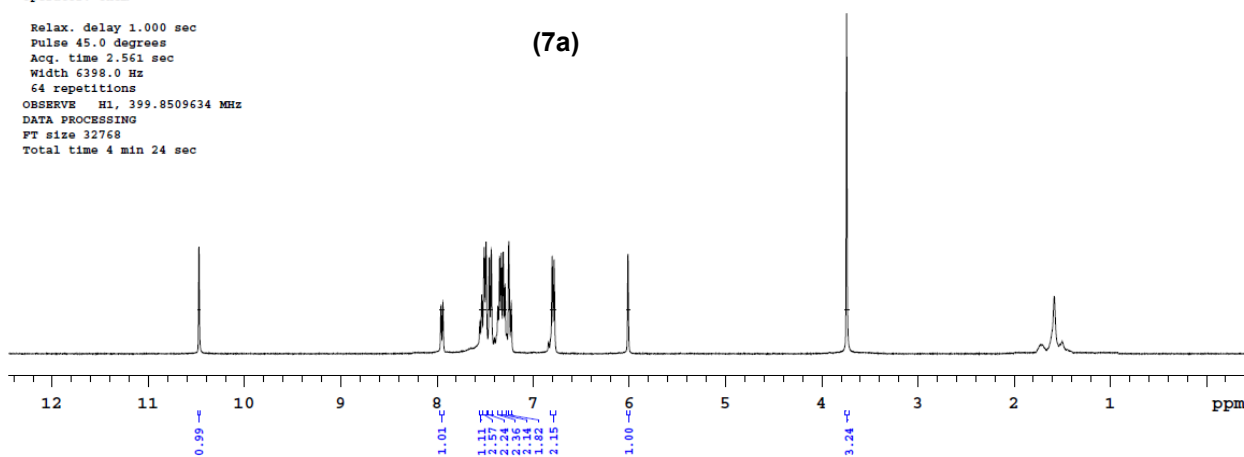

**<sup>13</sup>C NMR (100 MHz, CDCl<sub>3</sub>): 4-hydroxy-3-(((4-methoxyphenyl)thio)(phenyl)methyl)-2H-chromen-2-one (7a)**

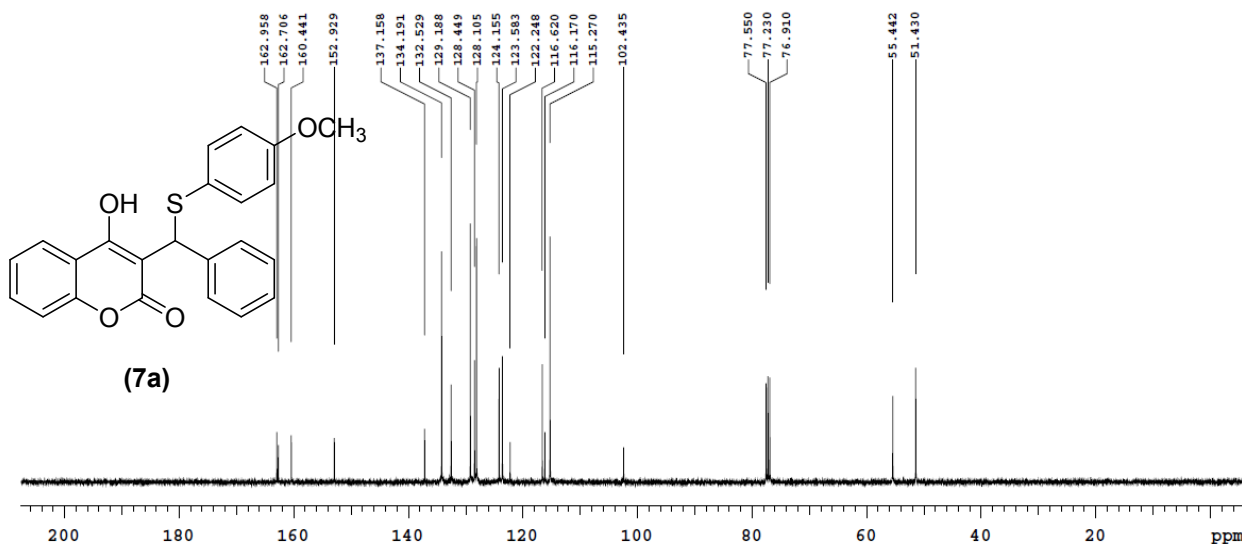

|                                                                                                                                      |                                                                                                                            |                                                                                            |                                                                                                             |
|--------------------------------------------------------------------------------------------------------------------------------------|----------------------------------------------------------------------------------------------------------------------------|--------------------------------------------------------------------------------------------|-------------------------------------------------------------------------------------------------------------|
| <b>PULSE SEQUENCE</b><br>Relax. delay 1.000 sec<br>Pulse 45.0 degrees<br>Acq. time 1.304 sec<br>Width 25125.6 Hz<br>1264 repetitions | <b>OBSERVE C13, 100.5425893</b><br><b>DECOUPLE H1, 399.8529994</b><br>Power 42 dB<br>continuously on<br>WALTZ-16 modulated | <b>DATA PROCESSING</b><br>Line broadening 0.5 Hz<br>FT size 65536<br>Total time 48 minutes | <b>AD_DD_11_13C</b><br>Solvent: cdcl3<br>Temp. 25.0 C / 298.1 K<br>Operator: chem<br>Mercury-400 *IITG-NMR* |
|--------------------------------------------------------------------------------------------------------------------------------------|----------------------------------------------------------------------------------------------------------------------------|--------------------------------------------------------------------------------------------|-------------------------------------------------------------------------------------------------------------|

**<sup>1</sup>H NMR (400 MHz, CDCl<sub>3</sub>): 3-(((4-chlorophenyl)thio)(phenyl)methyl)-4-hydroxy-2H-chromen-2-one (8a)**

AD\_DD\_17\_1H  
 Sample Name:  
 AD\_DD\_17\_1H  
 Data Collected on:  
 IITG-NMR-mercury400  
 Archive directory:  
 Sample directory:  
 FidFile: PROTON  
 Pulse Sequence: PROTON (s2pul)  
 Solvent: cdcl3  
 Data collected on: Jan 6 2015  
 Temp. 25.0 C / 298.1 K  
 Operator: chem  
 Relax. delay 1.000 sec  
 Pulse 45.0 degrees  
 Acq. time 2.561 sec  
 Width 6398.0 Hz  
 64 repetitions  
 OBSERVE H1, 399.8509634 MHz  
 DATA PROCESSING  
 FT size 32768  
 Total time 4 min 24 sec

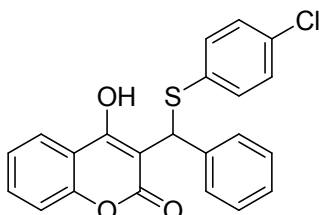

(8a)

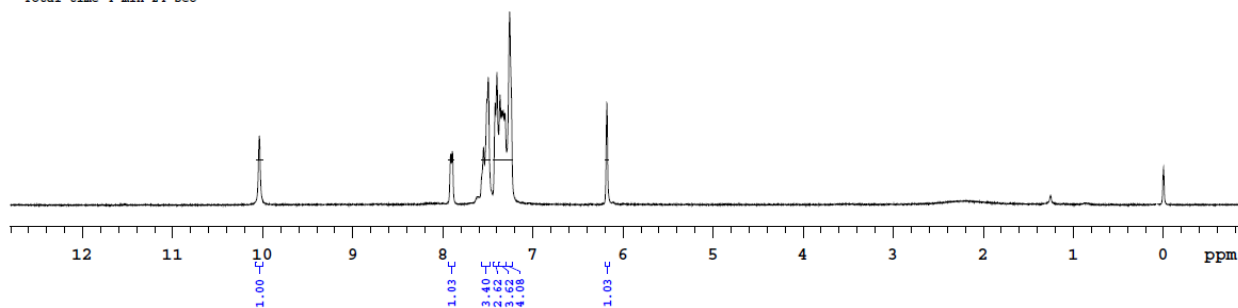

**<sup>13</sup>C NMR (100 MHz, CDCl<sub>3</sub>): 3-(((4-chlorophenyl)thio)(phenyl)methyl)-4-hydroxy-2H-chromen-2-one (8a)**

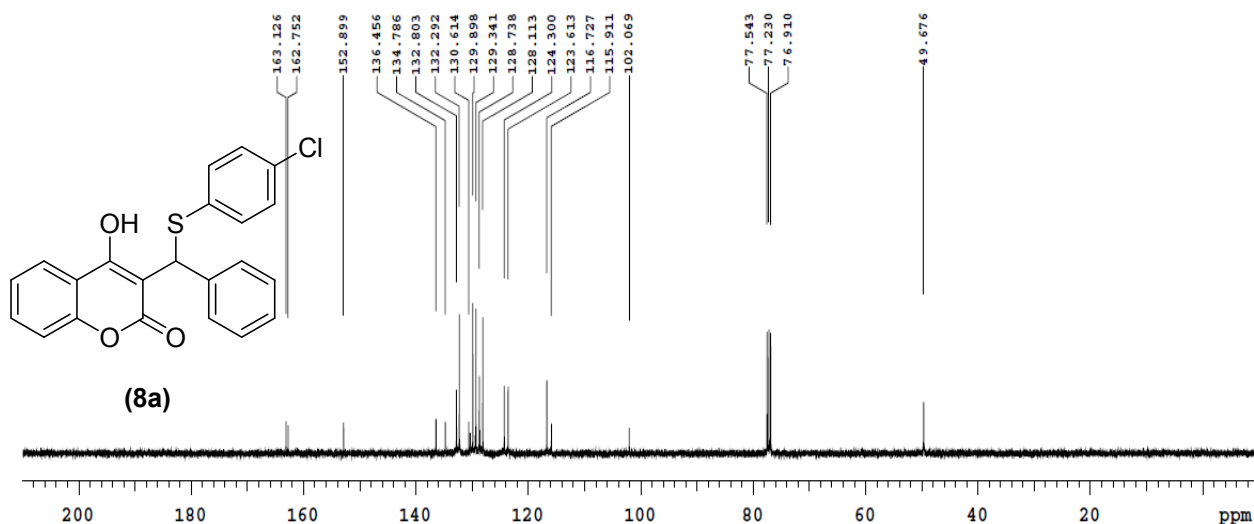

|                                                                                                                                     |                                                                                                                            |                                                                                            |                                                                                                             |
|-------------------------------------------------------------------------------------------------------------------------------------|----------------------------------------------------------------------------------------------------------------------------|--------------------------------------------------------------------------------------------|-------------------------------------------------------------------------------------------------------------|
| <b>PULSE SEQUENCE</b><br>Relax. delay 1.000 sec<br>Pulse 45.0 degrees<br>Acq. time 1.304 sec<br>Width 25125.6 Hz<br>280 repetitions | <b>OBSERVE</b> C13, 100.5425893<br><b>DECOUPLE</b> H1, 399.8529994<br>Power 42 dB<br>continuously on<br>WALTZ-16 modulated | <b>DATA PROCESSING</b><br>Line broadening 0.5 Hz<br>FT size 65536<br>Total time 10 minutes | <b>AD_DD_17_13C</b><br>Solvent: cdcl3<br>Temp. 25.0 C / 298.1 K<br>Operator: chem<br>Mercury-400 *IITG-NMR* |
|-------------------------------------------------------------------------------------------------------------------------------------|----------------------------------------------------------------------------------------------------------------------------|--------------------------------------------------------------------------------------------|-------------------------------------------------------------------------------------------------------------|



**<sup>1</sup>H NMR (400 MHz, CDCl<sub>3</sub>): 3-(((2-chlorophenyl)thio)(phenyl)methyl)-4-hydroxy-2H-chromen-2-one (9a)**

AD\_DD\_28\_1H  
 Sample Name:  
 AD\_DD\_28\_1H  
 Data Collected on:  
 IITG-NMR-mercury400  
 Archive directory:  
 Sample directory:  
 FidFile: PROTON  
 Pulse Sequence: PROTON (s2pul)  
 Solvent: cdcl3  
 Data collected on: Jan 13 2015  
 Temp. 25.0 C / 298.1 K  
 Operator: chem  
 Relax. delay 1.000 sec  
 Pulse 45.0 degrees  
 Acq. time 2.561 sec  
 Width 6398.0 Hz  
 64 repetitions  
 OBSERVE H1, 399.8509634 MHz  
 DATA PROCESSING  
 FT size 32768  
 Total time 4 min 24 sec

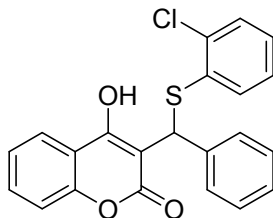

**(9a)**

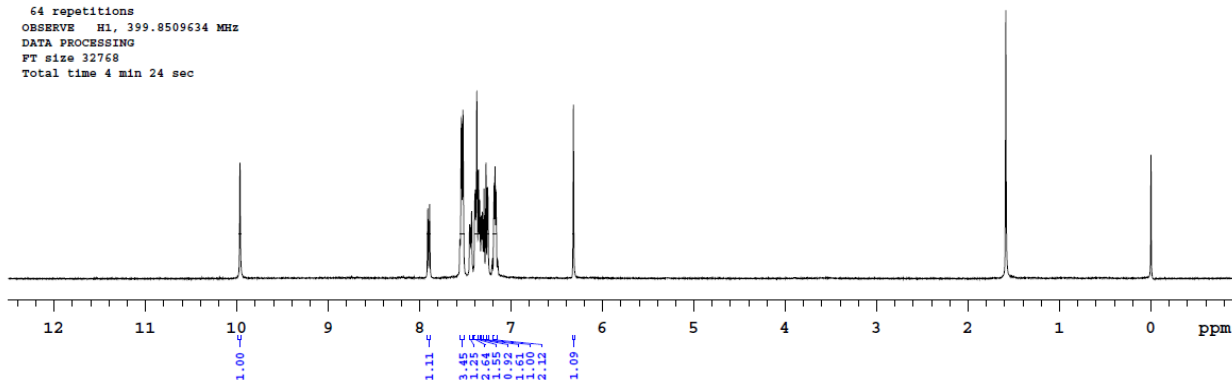

**<sup>13</sup>C NMR (100 MHz, CDCl<sub>3</sub>): 3-(((2-chlorophenyl)thio)(phenyl)methyl)-4-hydroxy-2H-chromen-2-one (9a)**

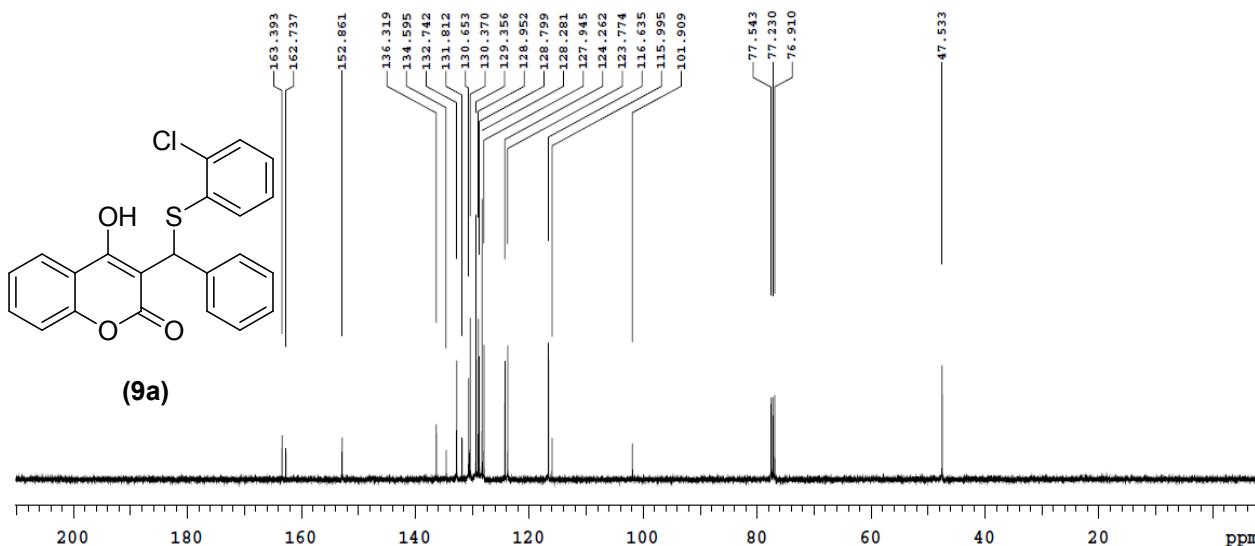

|                                                                                                                                     |                                                                                                                            |                                                                                            |                                                                                                             |
|-------------------------------------------------------------------------------------------------------------------------------------|----------------------------------------------------------------------------------------------------------------------------|--------------------------------------------------------------------------------------------|-------------------------------------------------------------------------------------------------------------|
| <b>PULSE SEQUENCE</b><br>Relax. delay 1.000 sec<br>Pulse 45.0 degrees<br>Acq. time 1.304 sec<br>Width 25125.6 Hz<br>396 repetitions | <b>OBSERVE</b> C13, 100.5425893<br><b>DECOUPLE</b> H1, 399.8529994<br>Power 42 dB<br>continuously on<br>WALTZ-16 modulated | <b>DATA PROCESSING</b><br>Line broadening 0.5 Hz<br>FT size 65536<br>Total time 15 minutes | <b>AD_DD_28_13C</b><br>Solvent: cdcl3<br>Temp. 25.0 C / 298.1 K<br>Operator: chem<br>Mercury-400 "IITG-NMR" |
|-------------------------------------------------------------------------------------------------------------------------------------|----------------------------------------------------------------------------------------------------------------------------|--------------------------------------------------------------------------------------------|-------------------------------------------------------------------------------------------------------------|

**<sup>1</sup>H NMR (400 MHz, CDCl<sub>3</sub>): 3-(((2-bromophenyl)thio)(phenyl)methyl)-4-hydroxy-2H-chromen-2-one (10a)**

AD\_DD\_29\_1H  
 Sample Name:  
 AD\_DD\_29\_1H  
 Data Collected on:  
 IITG-NMR-mercury400  
 Archive directory:  
 Sample directory:  
 FidFile: PROTON  
 Pulse Sequence: PROTON (s2pul)  
 Solvent: cdcl3  
 Data collected on: Jan 13 2015  
 Temp. 25.0 C / 298.1 K  
 Operator: chem  
 Relax. delay 1.000 sec  
 Pulse 45.0 degrees  
 Acq. time 2.561 sec  
 Width 6398.0 Hz  
 64 repetitions  
 OBSERVE H1, 399.8509598 MHz  
 DATA PROCESSING  
 FT size 32768  
 Total time 4 min 24 sec

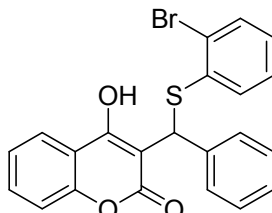

**(10a)**

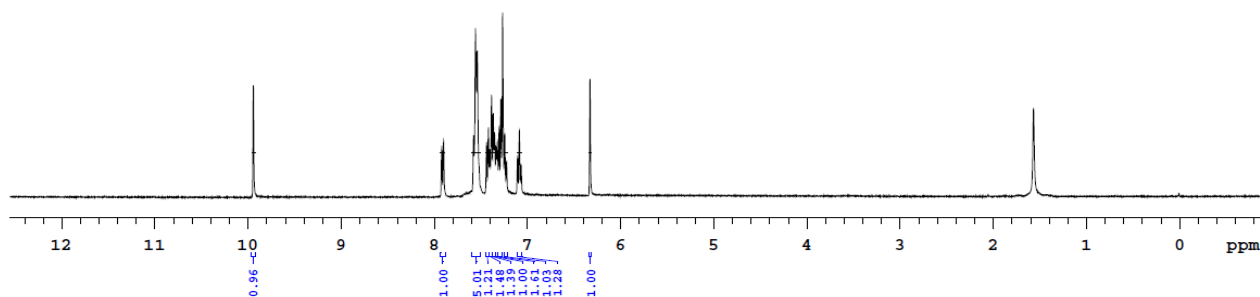

**<sup>13</sup>C NMR (100 MHz, CDCl<sub>3</sub>): 3-(((2-bromophenyl)thio)(phenyl)methyl)-4-hydroxy-2H-chromen-2-one (10a)**

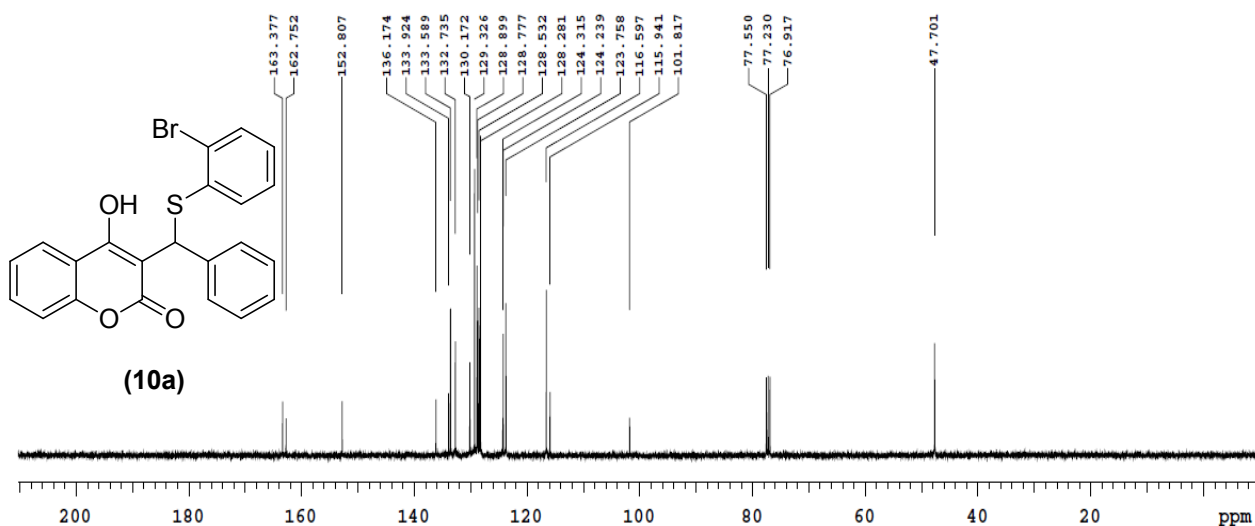

|                                                                                                                                    |                                                                                                                            |                                                                                           |                                                                                                             |
|------------------------------------------------------------------------------------------------------------------------------------|----------------------------------------------------------------------------------------------------------------------------|-------------------------------------------------------------------------------------------|-------------------------------------------------------------------------------------------------------------|
| <b>PULSE SEQUENCE</b><br>Relax. delay 1.000 sec<br>Pulse 45.0 degrees<br>Acq. time 1.304 sec<br>Width 25125.6 Hz<br>68 repetitions | <b>OBSERVE</b> C13, 100.5425939<br><b>DECOUPLE</b> H1, 399.8529994<br>Power 42 dB<br>continuously on<br>WALTZ-16 modulated | <b>DATA PROCESSING</b><br>Line broadening 0.5 Hz<br>FT size 65536<br>Total time 2 minutes | <b>AD_DD_29_13C</b><br>Solvent: cdcl3<br>Temp. 25.0 C / 298.1 K<br>Operator: chem<br>Mercury-400 "IITG-NMR" |
|------------------------------------------------------------------------------------------------------------------------------------|----------------------------------------------------------------------------------------------------------------------------|-------------------------------------------------------------------------------------------|-------------------------------------------------------------------------------------------------------------|

**<sup>1</sup>H NMR (400 MHz, CDCl<sub>3</sub>): 4-hydroxy-3-((naphthalen-2-ylthio)(phenyl)methyl)-2H-chromen-2-one (11a)**

AD\_DD\_20\_1H  
 Sample Name:  
 AD\_DD\_20\_1H  
 Data Collected on:  
 IITG-NMR-mercury400  
 Archive directory:  
 /export/home/chempack/vnmrsys/data  
 Sample directory:  
 Fidfile: AD\_DD\_20\_1H  
 Pulse Sequence: PROTON (s2pul)  
 Solvent: cdcl3  
 Data collected on: Jan 5 2015  
 Temp. 25.0 C / 298.1 K  
 Operator: chem  
 Relax. delay 1.000 sec  
 Pulse 45.0 degrees  
 Acq. time 2.561 sec  
 Width 6398.0 Hz  
 64 repetitions  
 OBSERVE H1, 399.8509634 MHz  
 DATA PROCESSING  
 FT size 32768  
 Total time 4 min 24 sec

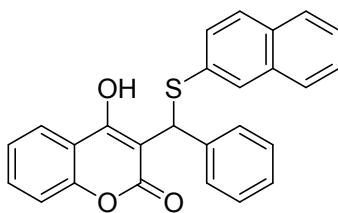

**(11a)**

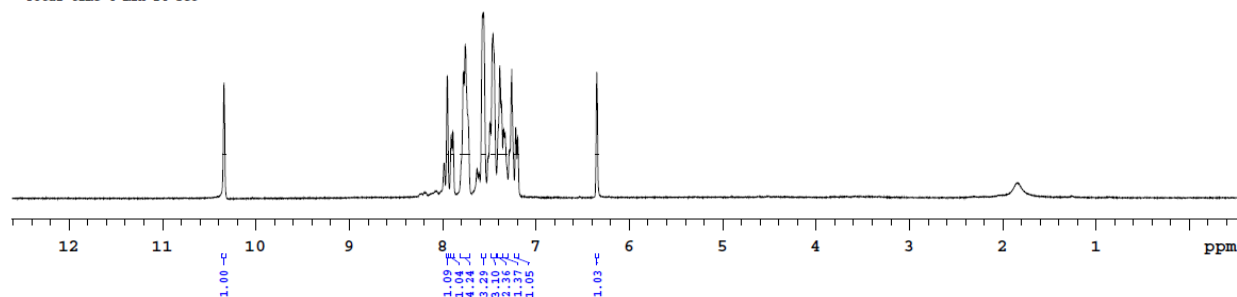

**<sup>13</sup>C NMR (100 MHz, CDCl<sub>3</sub>): 4-hydroxy-3-((naphthalen-2-ylthio)(phenyl)methyl)-2H-chromen-2-one (11a)**

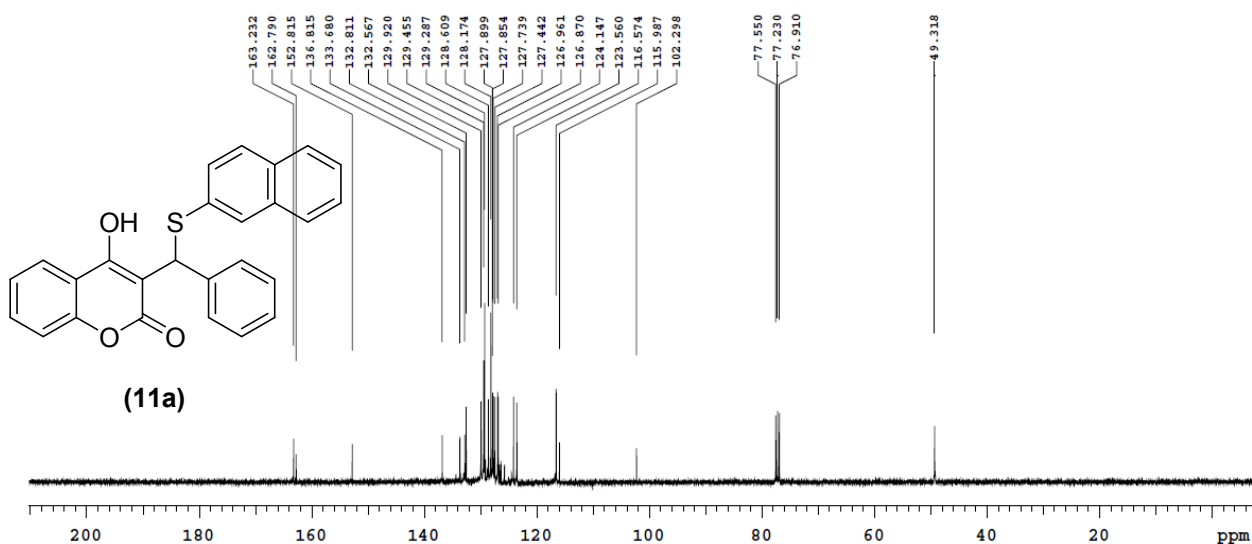

|                                                                                                                                     |                                                                                                                     |                                                                                            |                                                                                                             |
|-------------------------------------------------------------------------------------------------------------------------------------|---------------------------------------------------------------------------------------------------------------------|--------------------------------------------------------------------------------------------|-------------------------------------------------------------------------------------------------------------|
| <b>PULSE SEQUENCE</b><br>Relax. delay 1.000 sec<br>Pulse 45.0 degrees<br>Acq. time 1.304 sec<br>Width 25125.6 Hz<br>412 repetitions | <b>OBSERVE C13, 100.5425955</b><br>DECOUPLE H1, 399.8529994<br>Power 42 dB<br>continuously on<br>WALTZ-16 modulated | <b>DATA PROCESSING</b><br>Line broadening 0.5 Hz<br>FT size 65536<br>Total time 15 minutes | <b>AD_DD_20_13c</b><br>Solvent: cdcl3<br>Temp. 25.0 C / 298.1 K<br>Operator: chem<br>Mercury-400 *IITG-NMR* |
|-------------------------------------------------------------------------------------------------------------------------------------|---------------------------------------------------------------------------------------------------------------------|--------------------------------------------------------------------------------------------|-------------------------------------------------------------------------------------------------------------|

<sup>1</sup>H NMR (400 MHz, CDCl<sub>3</sub>): 4-hydroxy-3-((4-hydroxyphenyl)(phenylthio)methyl)-2H-chromen-2-one (12a)

```

AD_BK_04
exp1 s2pu1
SAMPLE
date Jun 18 2013 temp SPECIAL
solvent CDC13 gain not used
file exp spin not used
ACQUISITION hst 0.000
sw 6388.0 pv90 15.100
at 1.398 alpha 20.000
np 25528
fb not used i1 FLAGS n
bs 4 in n
dl 1.000 dp y
nt 64 hs nn
ct 64
TRANSMITTER H1 lb PROCESSING 0.10
tn H1 fn 65536
sfrq 399.853 sp DISPLAY -295.2
tof 362.8 wp 5313.9
tpwr 59 rF1 824.8
pw 7.559 rF1 0
DECOUPLER C13 rFp 150.3
dn 0 lp -96.0
dof 0
dm nnn C PLOT 250
dpcr 44 sc 0
dnt 17100 vs 69
nm cdc ph 20
  
```

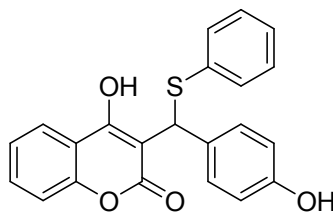

(12a)

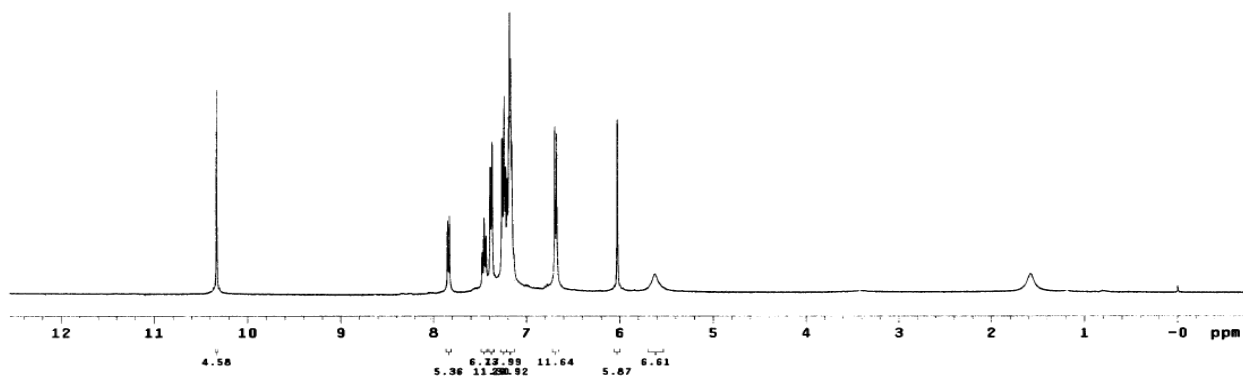

<sup>13</sup>C NMR (100 MHz, CDCl<sub>3</sub> + DMSO): 4-hydroxy-3-((4-hydroxyphenyl)(phenylthio)methyl)-2H-chromen-2-one (12a)

```

AD_BK_04.13C
exp1 s2pu1
SAMPLE
date Jun 20 2013 temp SPECIAL
solvent CDC13 gain not used
file exp spin not used
ACQUISITION hst 0.000
sw 25125.6 pv90 3.400
at 1.199 alpha 20.000
np 8270
fb 13800 i1 FLAGS n
bs 4 in n
dl 1.000 dp y
nt 3000 hs nn
ct 456
TRANSMITTER C13 lb PROCESSING 2.00
tn C13 fn 65536
sfrq 100.554 sp DISPLAY -754.9
tof 1536.3 wp 21361.4
tpwr 61 rF1 9873.3
pw 6.780 rF1 7765.0
DECOUPLER H1 rFp -34.7
dn 0 lp -306.2
dof 0
dm yyy w C PLOT 250
dpcr 42 sc 0
dnt 8580 vs 57
nm no ph 5
  
```

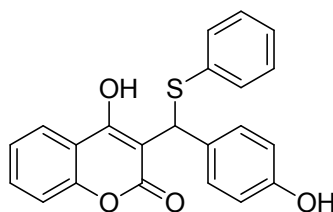

(12a)

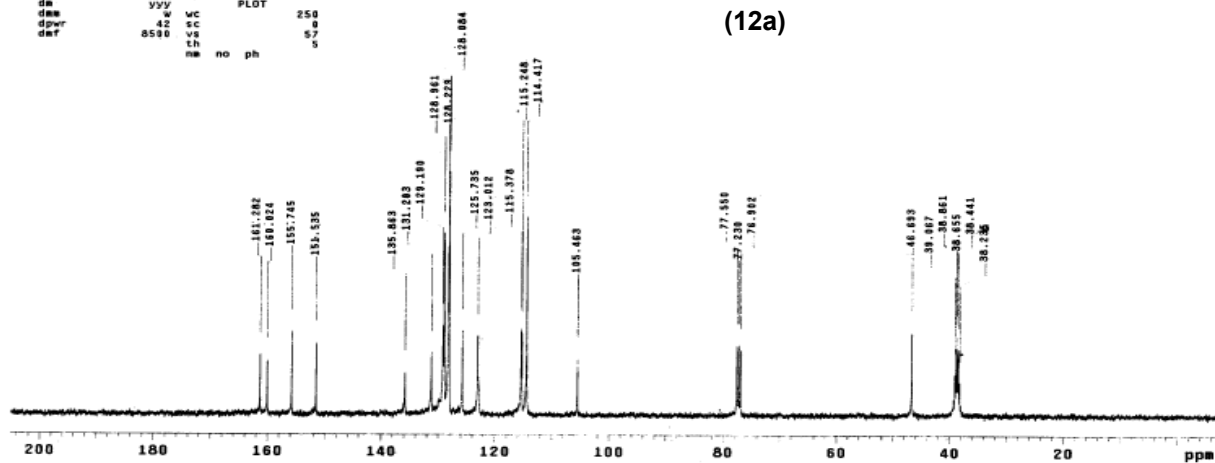

**<sup>1</sup>H NMR (400 MHz, CDCl<sub>3</sub>): 4-hydroxy-3-((phenylthio)(p-tolyl)methyl)-2H-chromen-2-one (13a)**

AD\_DD\_4\_1H

Sample Name:  
AD\_DD\_4\_1H  
Data Collected on:  
IITG-NMR-mercury400  
Archive directory:  
/home/chem/data/study  
Sample directory:  
DS-389-DEPT-01  
FidFile: PROTON

Pulse Sequence: PROTON (s2pul)  
Solvent: cdcl3  
Data collected on: Jun 3 2014

Temp. 25.0 c / 298.1 K  
Operator: chem

Relax. delay 1.000 sec  
Pulse 45.0 degrees  
Acq. time 2.561 sec  
Width 6398.0 Hz  
64 repetitions  
OBSERVE H1, 399.8509634 MHz  
DATA PROCESSING  
FT size 32768  
Total time 4 min 24 sec

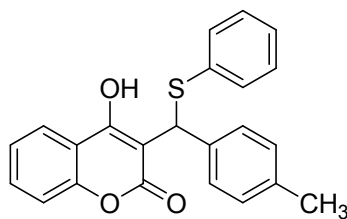

**(13a)**

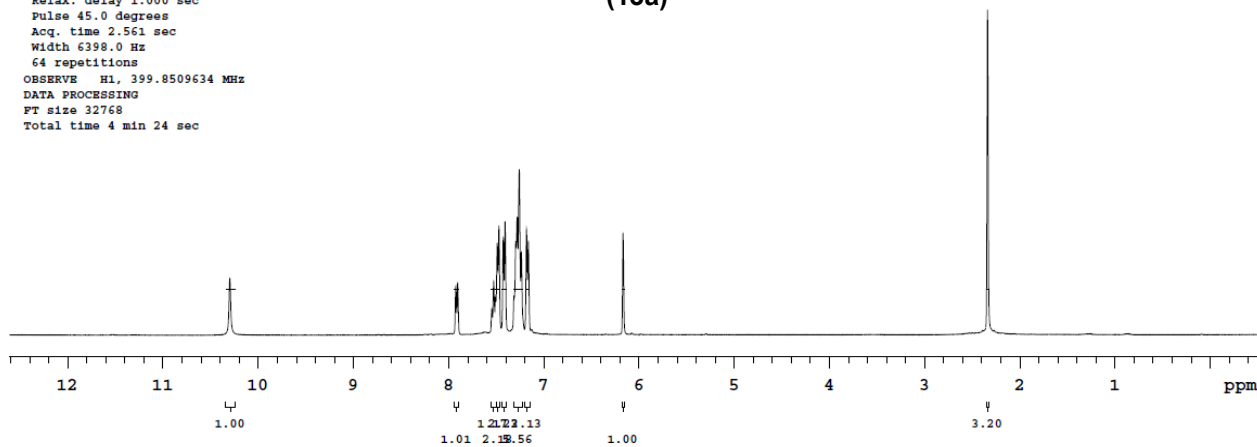

**<sup>13</sup>C NMR (100 MHz, CDCl<sub>3</sub>): 4-hydroxy-3-((phenylthio)(p-tolyl)methyl)-2H-chromen-2-one (13a)**

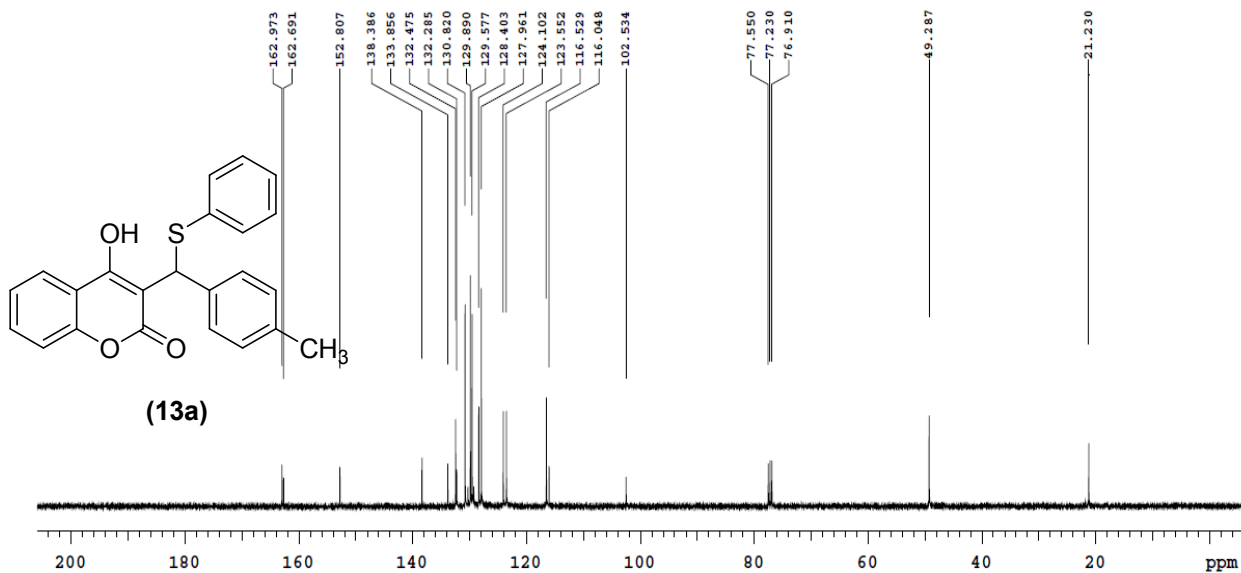

|                                                                                                                                          |                                                                                                                         |                                                                                               |                                                                                                                |
|------------------------------------------------------------------------------------------------------------------------------------------|-------------------------------------------------------------------------------------------------------------------------|-----------------------------------------------------------------------------------------------|----------------------------------------------------------------------------------------------------------------|
| <p>PULSE SEQUENCE<br/>Relax. delay 1.000 sec<br/>Pulse 45.0 degrees<br/>Acq. time 1.304 sec<br/>Width 25125.6 Hz<br/>824 repetitions</p> | <p>OBSERVE C13, 100.5425978<br/>DECOUPLE H1, 399.8529994<br/>Power 42 dB<br/>continuously on<br/>WALTZ-16 modulated</p> | <p>DATA PROCESSING<br/>Line broadening 0.5 Hz<br/>FT size 65536<br/>Total time 31 minutes</p> | <p>AD_DD_4_13C<br/>Solvent: cdcl3<br/>Temp. 25.0 c / 298.1 K<br/>Operator: chem<br/>Mercury-400 *IITG-NMR*</p> |
|------------------------------------------------------------------------------------------------------------------------------------------|-------------------------------------------------------------------------------------------------------------------------|-----------------------------------------------------------------------------------------------|----------------------------------------------------------------------------------------------------------------|

**<sup>1</sup>H NMR (400 MHz, CDCl<sub>3</sub>): 3-(cyclohexyl(phenylthio)methyl)-4-hydroxy-2H-chromen-2-one (14a)**

AD\_DD\_25\_1H  
 Sample Name:  
 AD\_DD\_25\_1H  
 Data Collected on:  
 IITG-NMR-mercury400  
 Archive directory:  
 /export/home/chempack/vnmrsys/data  
 Sample directory:  
 FIDFile: PROTON  
 Pulse Sequence: PROTON (s2pul)  
 Solvent: cdcl3  
 Data collected on: May 15 2014  
 Temp. 25.0 C / 298.1 K  
 Operator: chem  
 Relax. delay 1.000 sec  
 Pulse 45.0 degrees  
 Acq. time 2.561 sec  
 Width 6398.0 Hz  
 64 repetitions  
 OBSERVE H1, 399.8509634 MHz  
 DATA PROCESSING  
 FT size 32768  
 Total time 4 min 24 sec

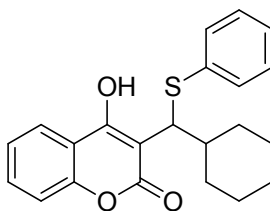

**(14a)**

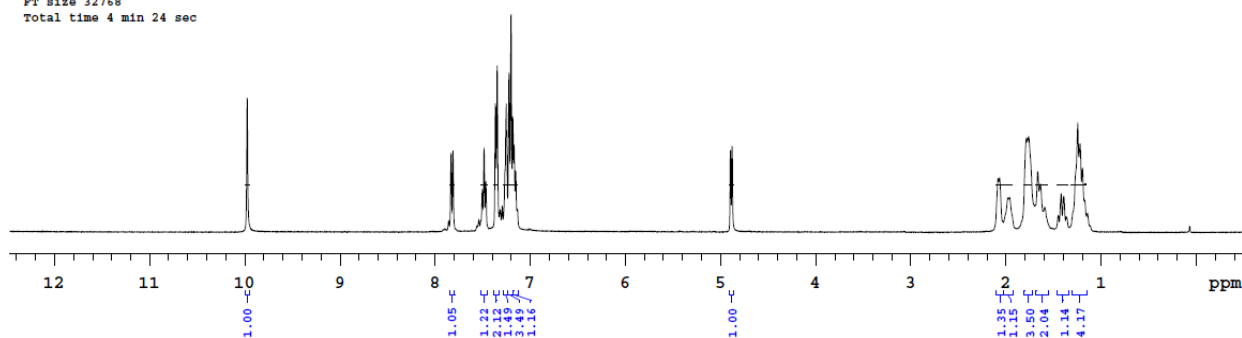

**<sup>13</sup>C NMR (100 MHz, CDCl<sub>3</sub>): 3-(cyclohexyl(phenylthio)methyl)-4-hydroxy-2H-chromen-2-one (14a)**

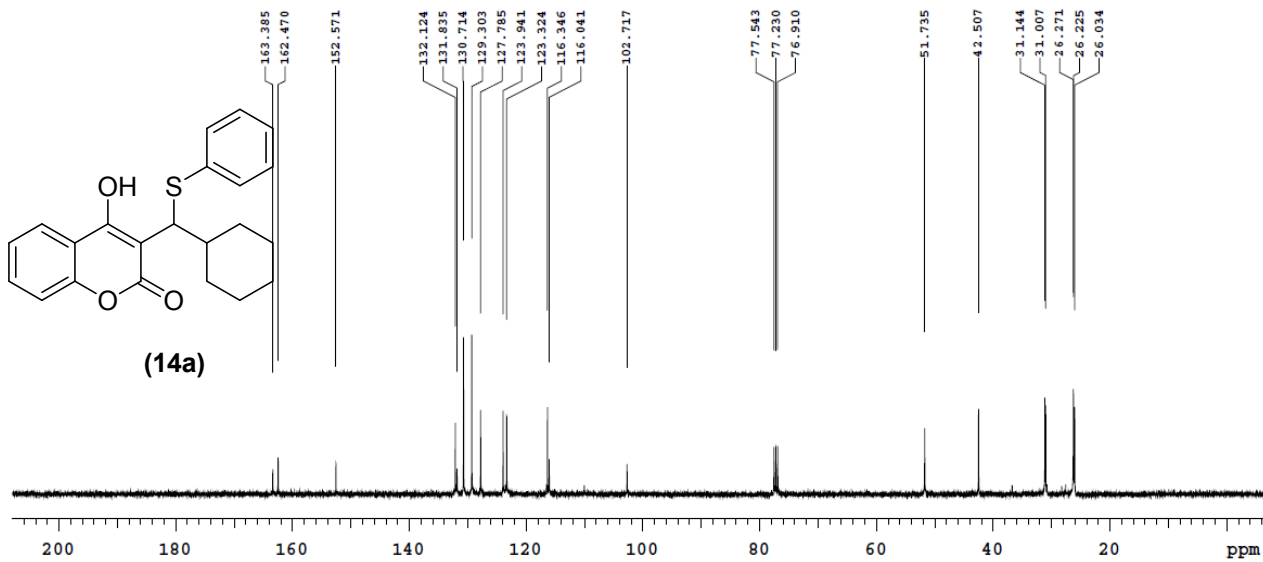

|                                                                                                                                                                                       |                                                                                                                                                             |                                                                                                                         |                                                                                                                                                     |
|---------------------------------------------------------------------------------------------------------------------------------------------------------------------------------------|-------------------------------------------------------------------------------------------------------------------------------------------------------------|-------------------------------------------------------------------------------------------------------------------------|-----------------------------------------------------------------------------------------------------------------------------------------------------|
| <p>PULSE SEQUENCE<br/>         Relax. delay 1.000 sec<br/>         Pulse 45.0 degrees<br/>         Acq. time 1.304 sec<br/>         Width 25125.6 Hz<br/>         136 repetitions</p> | <p>OBSERVE C13, 100.5426001<br/>         DECOUPLE H1, 399.8529994<br/>         Power 42 dB<br/>         continuously on<br/>         WALTZ-16 modulated</p> | <p>DATA PROCESSING<br/>         Line broadening 0.5 Hz<br/>         FT size 65536<br/>         Total time 5 minutes</p> | <p>AD_DD_25_13C<br/>         Solvent: cdcl3<br/>         Temp. 25.0 C / 298.1 K<br/>         Operator: chem<br/>         Mercury-400 *IITG-NMR*</p> |
|---------------------------------------------------------------------------------------------------------------------------------------------------------------------------------------|-------------------------------------------------------------------------------------------------------------------------------------------------------------|-------------------------------------------------------------------------------------------------------------------------|-----------------------------------------------------------------------------------------------------------------------------------------------------|

<sup>1</sup>H NMR (400 MHz, CDCl<sub>3</sub>): (E)-4-hydroxy-3-(1-(phenylthio)but-2-en-1-yl)-2H-chromen-2-one (15a)

AD\_DD\_26\_1H

Sample Name:  
AD\_DD\_26\_1H  
Data Collected on:  
IITG-NMR-mercury400  
Archive directory:  
/home/chem/data/study  
Sample directory:  
ALD-PPG-PR-5-01  
FidFile: AD\_DD\_26\_1H

Pulse Sequence: PROTON (s2pul)  
Solvent: cdcl3  
Data collected on: May 16 2014

Temp. 25.0 C / 298.1 K  
Operator: chem

Relax. delay 1.000 sec  
Pulse 45.0 degrees  
Acq. time 2.561 sec  
Width 6398.0 Hz  
64 repetitions  
OBSERVE H1, 399.8509890 MHz  
DATA PROCESSING  
FT size 32768  
Total time 4 min 24 sec

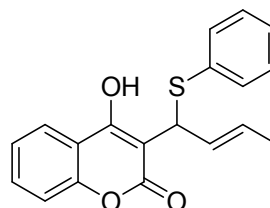

(15a)

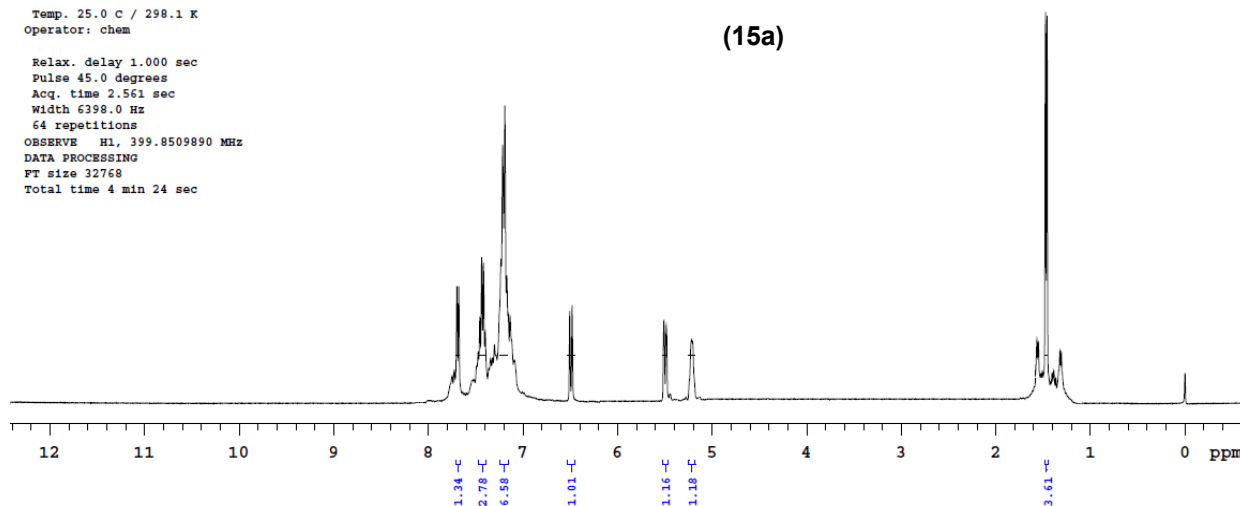

<sup>13</sup>C NMR (100 MHz, CDCl<sub>3</sub>): (E)-4-hydroxy-3-(1-(phenylthio)but-2-en-1-yl)-2H-chromen-2-one (15a)

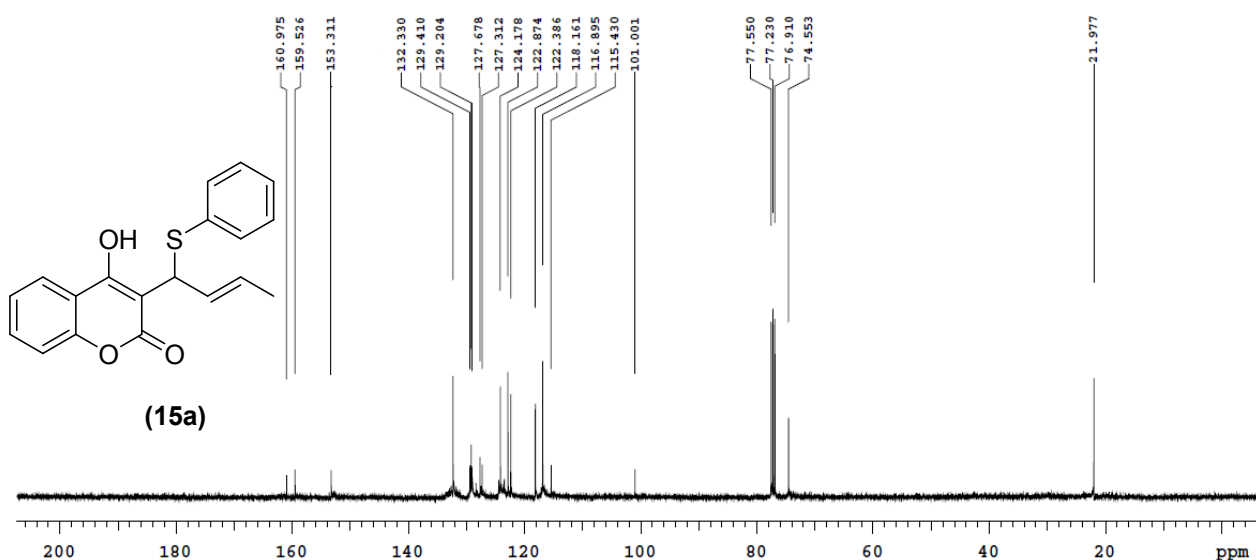

|                                                                                                                                           |                                                                                                                         |                                                                                               |                                                                                                                 |
|-------------------------------------------------------------------------------------------------------------------------------------------|-------------------------------------------------------------------------------------------------------------------------|-----------------------------------------------------------------------------------------------|-----------------------------------------------------------------------------------------------------------------|
| <p>PULSE SEQUENCE<br/>Relax. delay 1.000 sec<br/>Pulse 45.0 degrees<br/>Acq. time 1.304 sec<br/>Width 25125.6 Hz<br/>2324 repetitions</p> | <p>OBSERVE C13, 100.5425870<br/>DECOUPLE H1, 399.8529994<br/>Power 42 dB<br/>continuously on<br/>WALTZ-16 modulated</p> | <p>DATA PROCESSING<br/>Line broadening 0.5 Hz<br/>FT size 65536<br/>Total time 89 minutes</p> | <p>AD_DD_26_13C<br/>Solvent: cdcl3<br/>Temp. 25.0 C / 298.1 K<br/>Operator: chem<br/>Mercury-400 *IITG-NMR*</p> |
|-------------------------------------------------------------------------------------------------------------------------------------------|-------------------------------------------------------------------------------------------------------------------------|-----------------------------------------------------------------------------------------------|-----------------------------------------------------------------------------------------------------------------|

<sup>1</sup>H NMR (400 MHz, CDCl<sub>3</sub>): 4-hydroxy-3-(phenyl(p-tolylthio)methyl)-2H-chromen-2-one (16a)

AD\_DD\_7\_1H

Sample Name:  
AD\_DD\_7\_1H  
Data Collected on:  
IITG-NMR-mercury400  
Archive directory:

Sample directory:

Fidfile: PROTON

Pulse Sequence: PROTON (s2pul)  
Solvent: cdcl3  
Data collected on: May 28 2014

Temp. 25.0 C / 298.1 K  
Operator: chem

Relax. delay 1.000 sec  
Pulse 45.0 degrees  
Acq. time 2.561 sec  
Width 6398.0 Hz  
64 repetitions  
OBSERVE H1, 399.8509634 MHz  
DATA PROCESSING  
FT size 32768  
Total time 4 min 24 sec

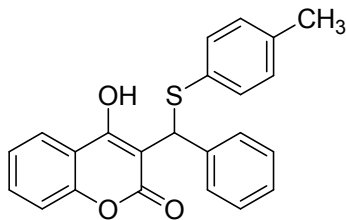

(16a)

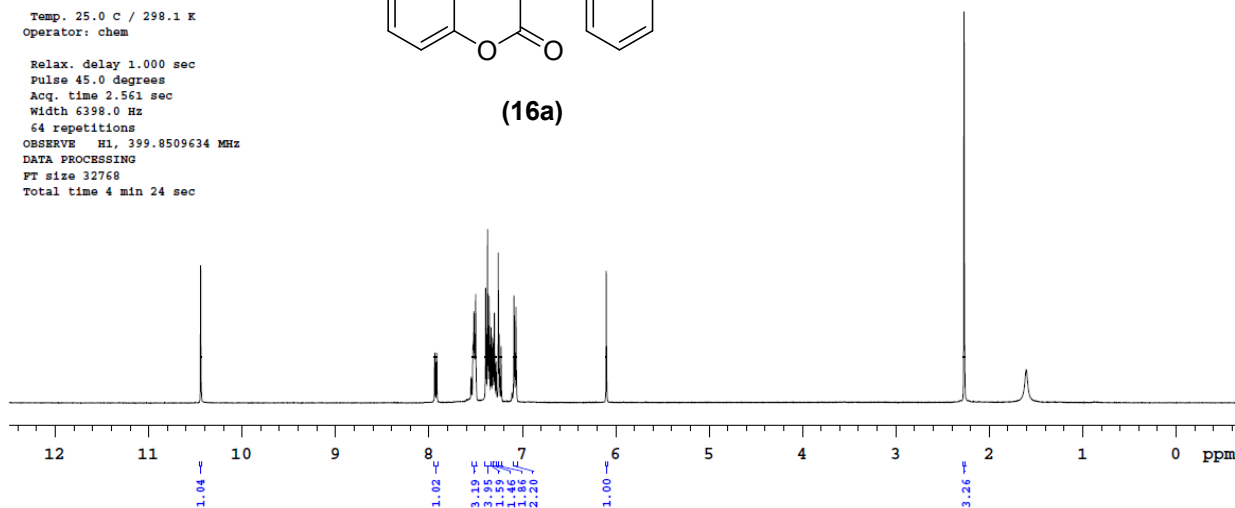

<sup>13</sup>C NMR (100 MHz, CDCl<sub>3</sub>): 4-hydroxy-3-(phenyl(p-tolylthio)methyl)-2H-chromen-2-one (16a)

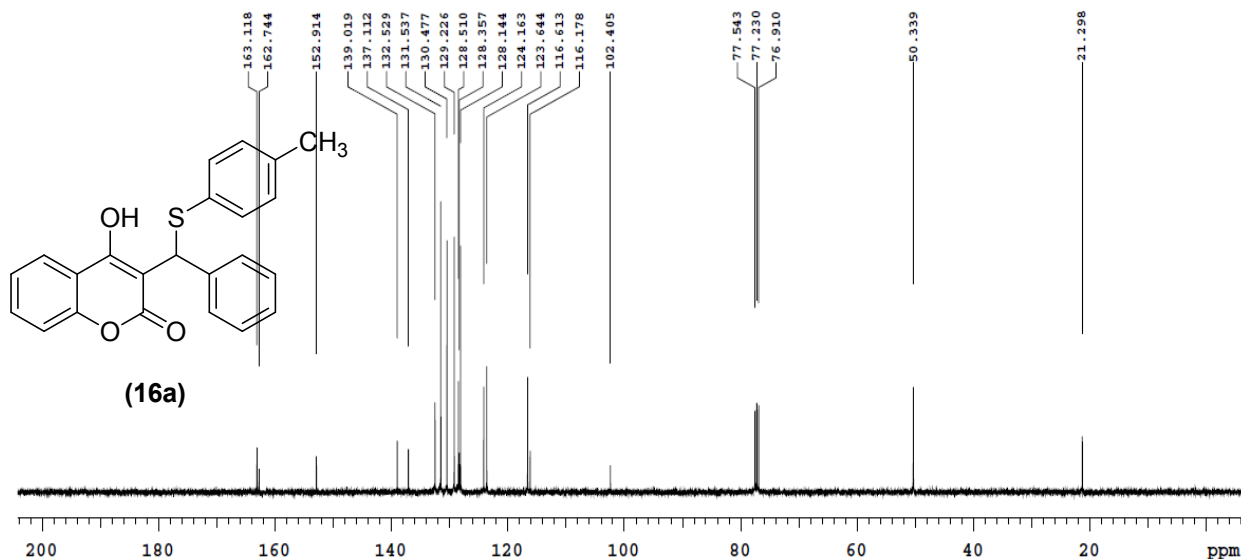

PULSE SEQUENCE  
Relax. delay 1.000 sec  
Pulse 45.0 degrees  
Acq. time 1.304 sec  
Width 25125.6 Hz  
400 repetitions

OBSERVE C13, 100.5425878  
DECOUPLE H1, 399.8529994  
Power 42 dB  
continuously on  
WALTZ-16 modulated

DATA PROCESSING  
Line broadening 0.5 Hz  
FT size 65536  
Total time 15 minutes

AD\_DD\_7\_13C

Solvent: cdcl3  
Temp. 25.0 C / 298.1 K  
Operator: chem  
File: AD\_DD\_7\_13C  
Mercury-400 \*IITG-NMR\*



**<sup>1</sup>H NMR (400 MHz, CDCl<sub>3</sub>): 4-hydroxy-3-((4-hydroxyphenyl)(p-tolylthio)methyl)-2H-chromen-2-one (17a)**

AD\_DD\_12\_1H  
 Sample Name:  
 AD\_DD\_12\_1H  
 Data Collected on:  
 IITG-NMR-mercury400  
 Archive directory:  
 Sample directory:  
 Fidfile: PROTON  
 Pulse Sequence: PROTON (s2pul)  
 Solvent: cdcl3  
 Data collected on: May 19 2014  
 Temp. 25.0 c / 298.1 K  
 Operator: chem  
 Relax. delay 1.000 sec  
 Pulse 45.0 degrees  
 Acq. time 2.561 sec  
 Width 6398.0 Hz  
 64 repetitions  
 OBSERVE H1, 399.8509634 MHz  
 DATA PROCESSING  
 FT size 32768  
 Total time 4 min 24 sec

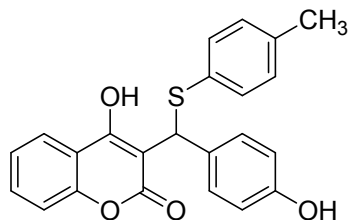

(17a)

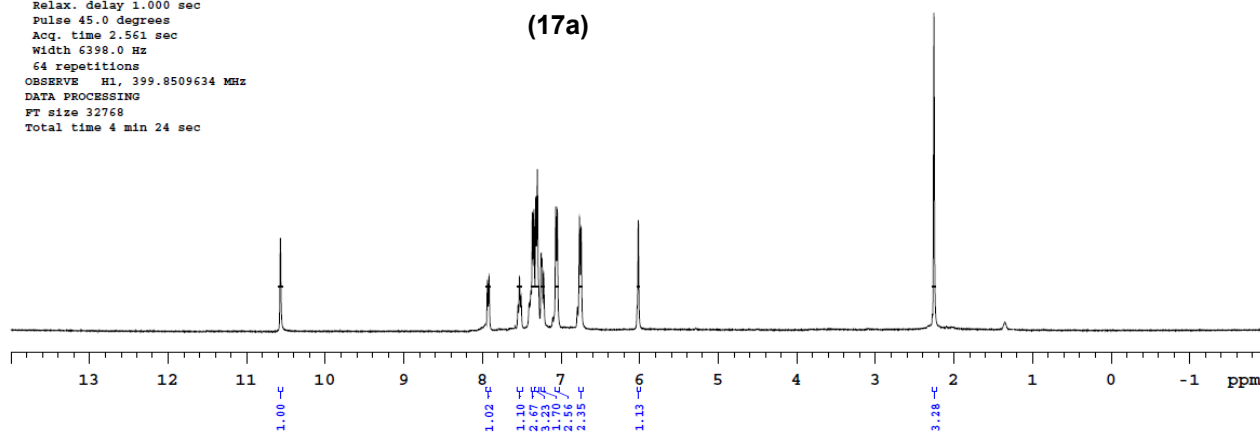

**<sup>13</sup>C NMR (100 MHz, CDCl<sub>3</sub>): 4-hydroxy-3-((4-hydroxyphenyl)(p-tolylthio)methyl)-2H-chromen-2-one (17a)**

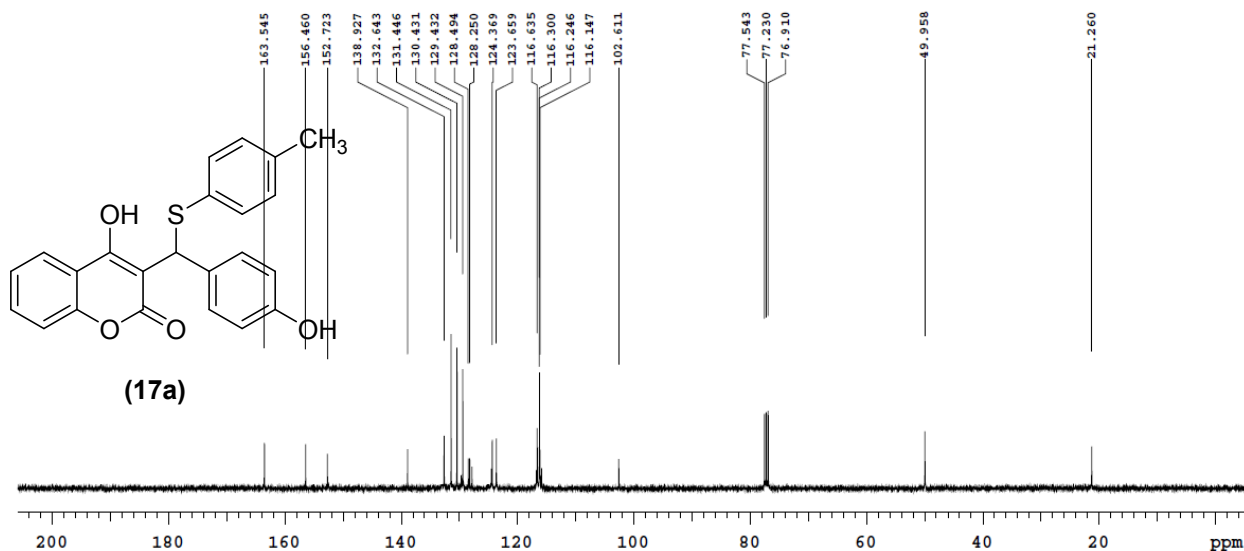

|                                                                                                                                     |                                                                                                                            |                                                                                            |                                                                                                                                   |
|-------------------------------------------------------------------------------------------------------------------------------------|----------------------------------------------------------------------------------------------------------------------------|--------------------------------------------------------------------------------------------|-----------------------------------------------------------------------------------------------------------------------------------|
| <b>PULSE SEQUENCE</b><br>Relax. delay 1.000 sec<br>Pulse 45.0 degrees<br>Acq. time 1.304 sec<br>Width 25125.6 Hz<br>950 repetitions | <b>OBSERVE</b> C13, 100.5425893<br><b>DECOUPLE</b> H1, 399.8529994<br>Power 42 dB<br>continuously on<br>WALTZ-16 modulated | <b>DATA PROCESSING</b><br>Line broadening 0.5 Hz<br>FT size 65536<br>Total time 36 minutes | <b>AD_DD_12_13C</b><br>Solvent: cdcl3<br>Temp. 25.0 c / 298.1 K<br>Operator: chem<br>File: AD_DD_12_13C<br>Mercury-400 *IITG-NMR* |
|-------------------------------------------------------------------------------------------------------------------------------------|----------------------------------------------------------------------------------------------------------------------------|--------------------------------------------------------------------------------------------|-----------------------------------------------------------------------------------------------------------------------------------|

**<sup>1</sup>H NMR (400 MHz, CDCl<sub>3</sub>): 4-hydroxy-3-((4-methoxyphenyl)(p-tolylthio)methyl)-2H-chromen-2-one (18a)**

AD\_DD\_5\_1H  
 Sample Name:  
 AD\_DD\_5\_1H  
 Data Collected on:  
 IITG-NMR-mercury400  
 Archive directory:  
 Sample directory:  
 FidFile: PROTON  
 Pulse Sequence: PROTON (s2pul)  
 Solvent: cdcl3  
 Data collected on: Jun 3 2014  
 Temp. 25.0 C / 298.1 K  
 Operator: chem  
 Relax. delay 1.000 sec  
 Pulse 45.0 degrees  
 Acq. time 2.561 sec  
 Width 6398.0 Hz  
 64 repetitions  
 OBSERVE H1, 399.8509634 MHz  
 DATA PROCESSING  
 FT size 32768  
 Total time 4 min 24 sec

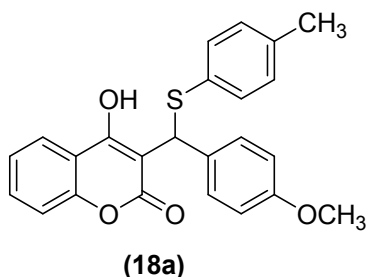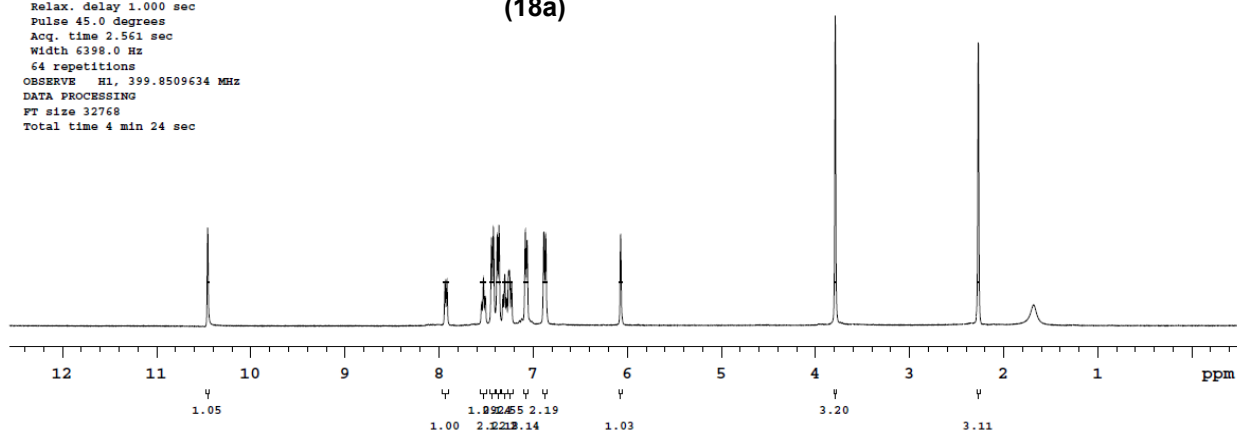

**<sup>13</sup>C NMR (100 MHz, CDCl<sub>3</sub>): 4-hydroxy-3-((4-methoxyphenyl)(p-tolylthio)methyl)-2H-chromen-2-one (18a)**

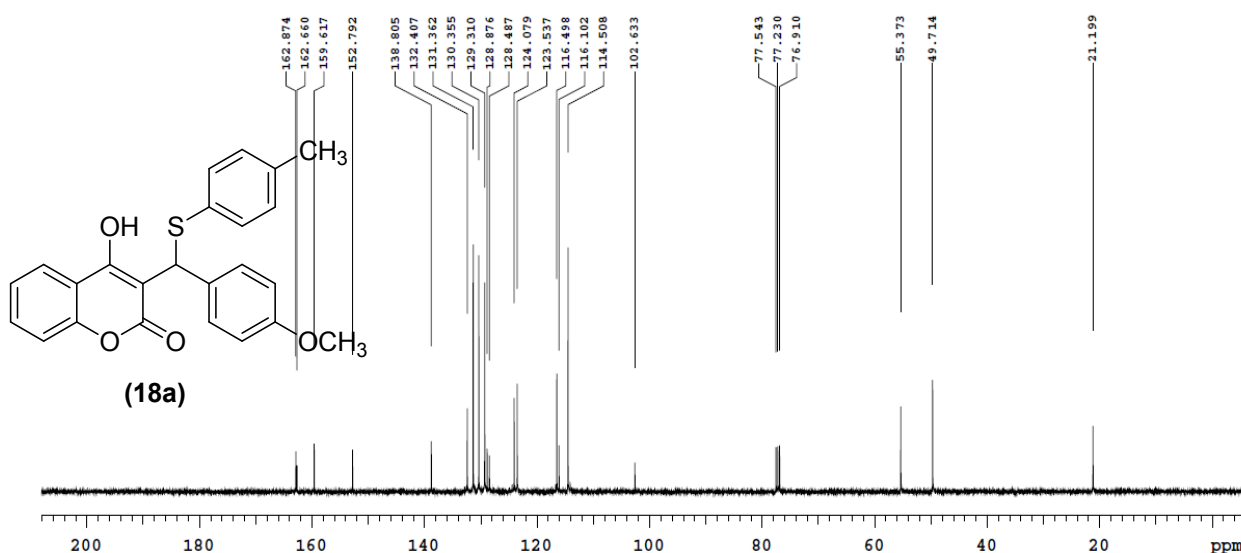

|                                                                                                                                     |                                                                                                                            |                                                                                            |                                                                                                            |
|-------------------------------------------------------------------------------------------------------------------------------------|----------------------------------------------------------------------------------------------------------------------------|--------------------------------------------------------------------------------------------|------------------------------------------------------------------------------------------------------------|
| <b>PULSE SEQUENCE</b><br>Relax. delay 1.000 sec<br>Pulse 45.0 degrees<br>Acq. time 1.304 sec<br>Width 25125.6 Hz<br>320 repetitions | <b>OBSERVE</b> C13, 100.5425978<br><b>DECOUPLE</b> H1, 399.8529994<br>Power 42 dB<br>continuously on<br>WALTZ-16 modulated | <b>DATA PROCESSING</b><br>Line broadening 0.5 Hz<br>FT size 65536<br>Total time 12 minutes | <b>AD_DD_5_13c</b><br>Solvent: cdcl3<br>Temp. 25.0 C / 298.1 K<br>Operator: chem<br>Mercury-400 *IITG-NMR* |
|-------------------------------------------------------------------------------------------------------------------------------------|----------------------------------------------------------------------------------------------------------------------------|--------------------------------------------------------------------------------------------|------------------------------------------------------------------------------------------------------------|

**<sup>1</sup>H NMR (400 MHz, CDCl<sub>3</sub>): 3-((4-chlorophenyl)(p-tolylthio)methyl)-4-hydroxy-2H-chromen-2-one (19a)**

AD\_DD\_14\_1H  
 Sample Name:  
 AD\_DD\_14\_1H  
 Data Collected on:  
 IITG-NMR-mercury400  
 Archive directory:  
 /export/home/chempack/vnmrsys/data  
 Sample directory:  
 Fidfile: PROTON  
 Pulse Sequence: PROTON (s2pul)  
 Solvent: cdcl3  
 Data collected on: Jul 2 2014  
 Temp. 25.0 C / 298.1 K  
 Operator: chem  
 Relax. delay 1.000 sec  
 Pulse 45.0 degrees  
 Acq. time 2.561 sec  
 Width 6398.0 Hz  
 32 repetitions  
 OBSERVE H1, 399.8509656 MHz  
 DATA PROCESSING  
 FT size 32768  
 Total time 2 min 12 sec

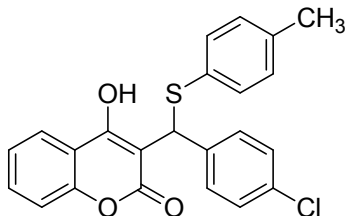

(19a)

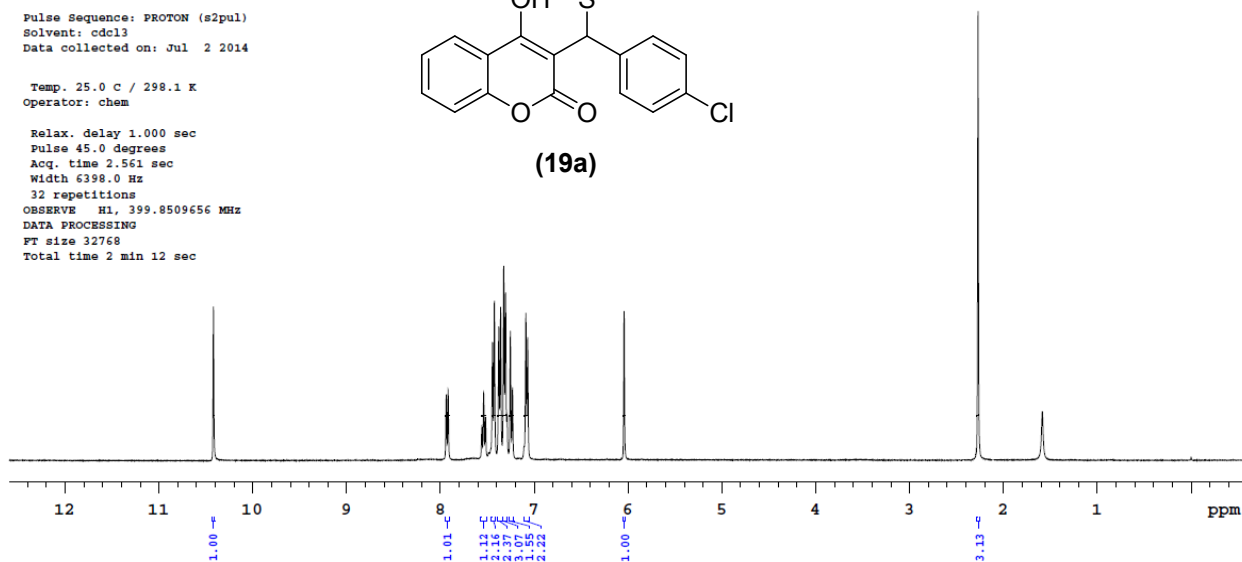

**<sup>13</sup>C NMR (100 MHz, CDCl<sub>3</sub>): 3-((4-chlorophenyl)(p-tolylthio)methyl)-4-hydroxy-2H-chromen-2-one (19a)**

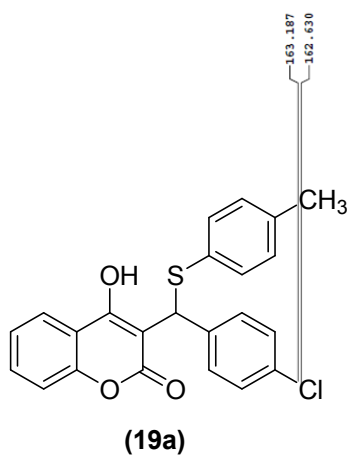

(19a)

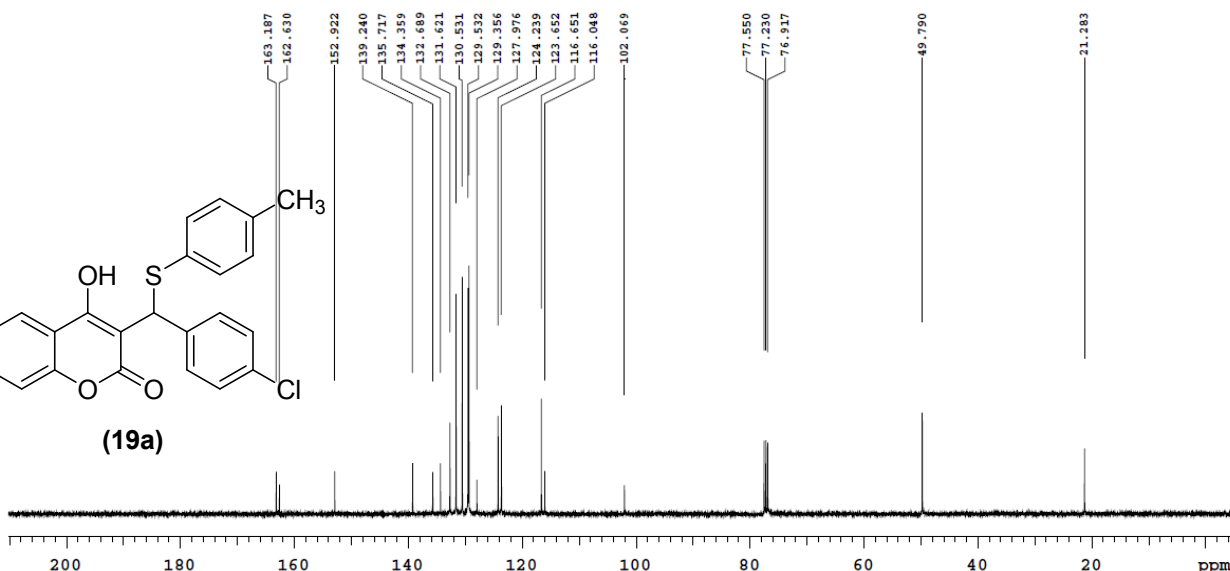

|                                                                                                                              |                                                                                                              |                                                                                     |                                                                                                      |
|------------------------------------------------------------------------------------------------------------------------------|--------------------------------------------------------------------------------------------------------------|-------------------------------------------------------------------------------------|------------------------------------------------------------------------------------------------------|
| PULSE SEQUENCE<br>Relax. delay 1.000 sec<br>Pulse 45.0 degrees<br>Acq. time 1.304 sec<br>Width 25125.6 Hz<br>664 repetitions | OBSERVE C13, 100.5425901<br>DECOUPLE H1, 399.8529994<br>Power 42 db<br>continuously on<br>WALTZ-16 modulated | DATA PROCESSING<br>Line broadening 0.5 Hz<br>FT size 65536<br>Total time 25 minutes | AD_DD_14_13C<br>solvent: cdcl3<br>Temp. 25.0 C / 298.1 K<br>Operator: chem<br>Mercury-400 *IITG-NMR* |
|------------------------------------------------------------------------------------------------------------------------------|--------------------------------------------------------------------------------------------------------------|-------------------------------------------------------------------------------------|------------------------------------------------------------------------------------------------------|

**<sup>1</sup>H NMR (400 MHz, CDCl<sub>3</sub>): 3-((4-bromophenyl)(p-tolylthio)methyl)-4-hydroxy-2H-chromen-2-one (20a)**

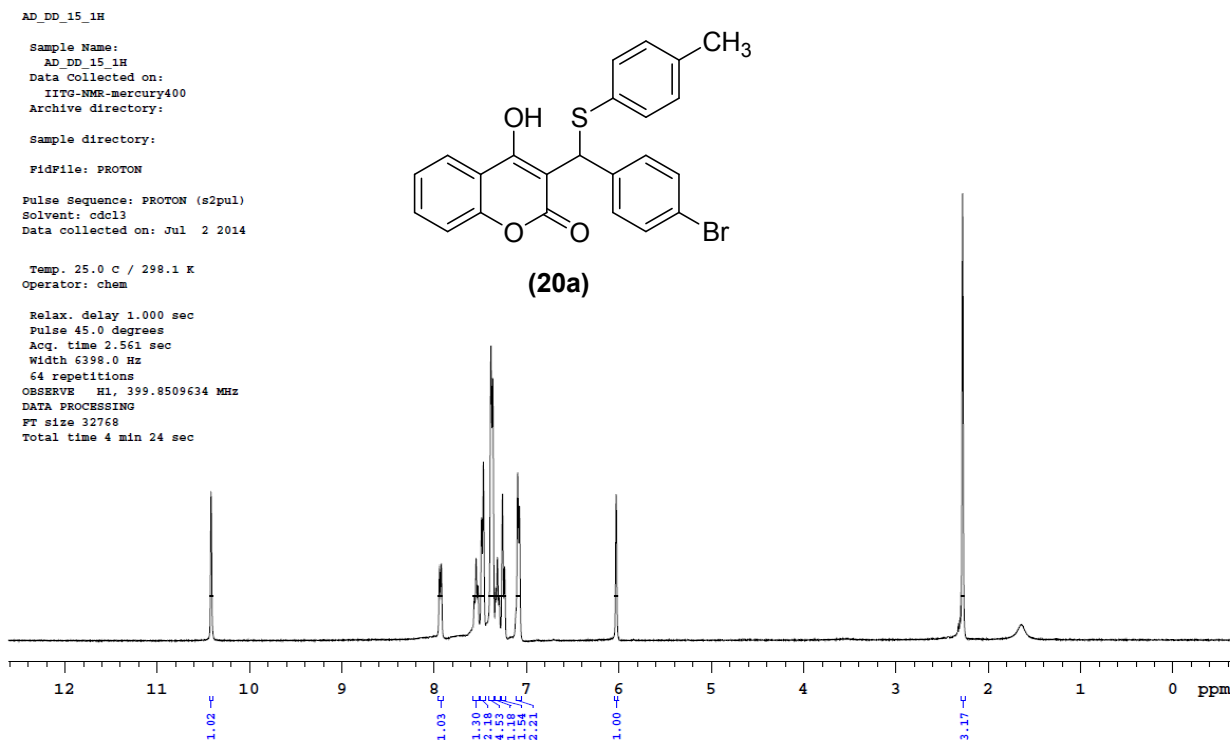

**<sup>13</sup>C NMR (100 MHz, CDCl<sub>3</sub>): 3-((4-bromophenyl)(p-tolylthio)methyl)-4-hydroxy-2H-chromen-2-one (20a)**

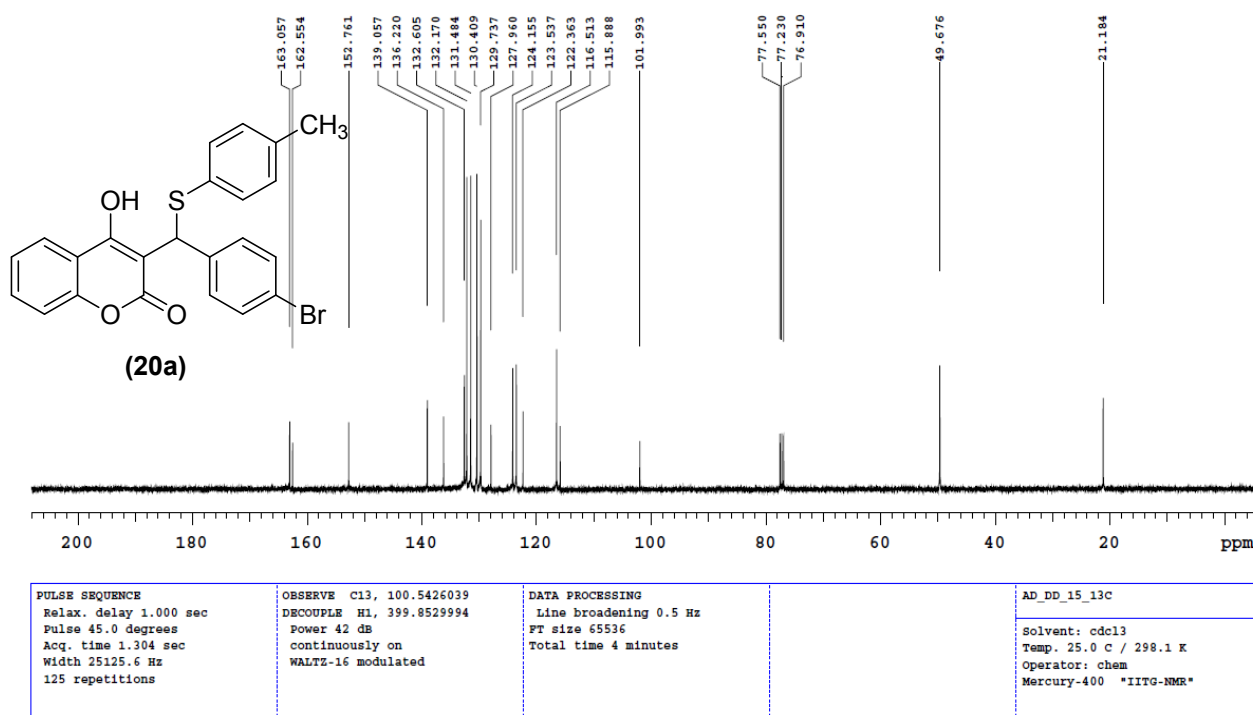

**<sup>1</sup>H NMR (400 MHz, CDCl<sub>3</sub>): 3-((4-fluorophenyl)(p-tolylthio)methyl)-4-hydroxy-2H-chromen-2-one (21a)**

AD\_DD\_10\_1H  
 Sample Name:  
 AD\_DD\_10\_1H  
 Data Collected on:  
 IITG-NMR-mercury400  
 Archive directory:  
 Sample directory:  
 FidFile: PROTON  
 Pulse Sequence: PROTON (s2pul)  
 Solvent: cdcl3  
 Data collected on: May 28 2014  
 Temp. 25.0 c / 298.1 K  
 Operator: chem  
 Relax. delay 1.000 sec  
 Pulse 45.0 degrees  
 Acq. time 2.561 sec  
 Width 6398.0 Hz  
 64 repetitions  
 OBSERVE H1, 399.8509634 MHz  
 DATA PROCESSING  
 FT size 32768  
 Total time 4 min 24 sec

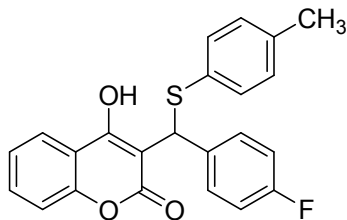

(21a)

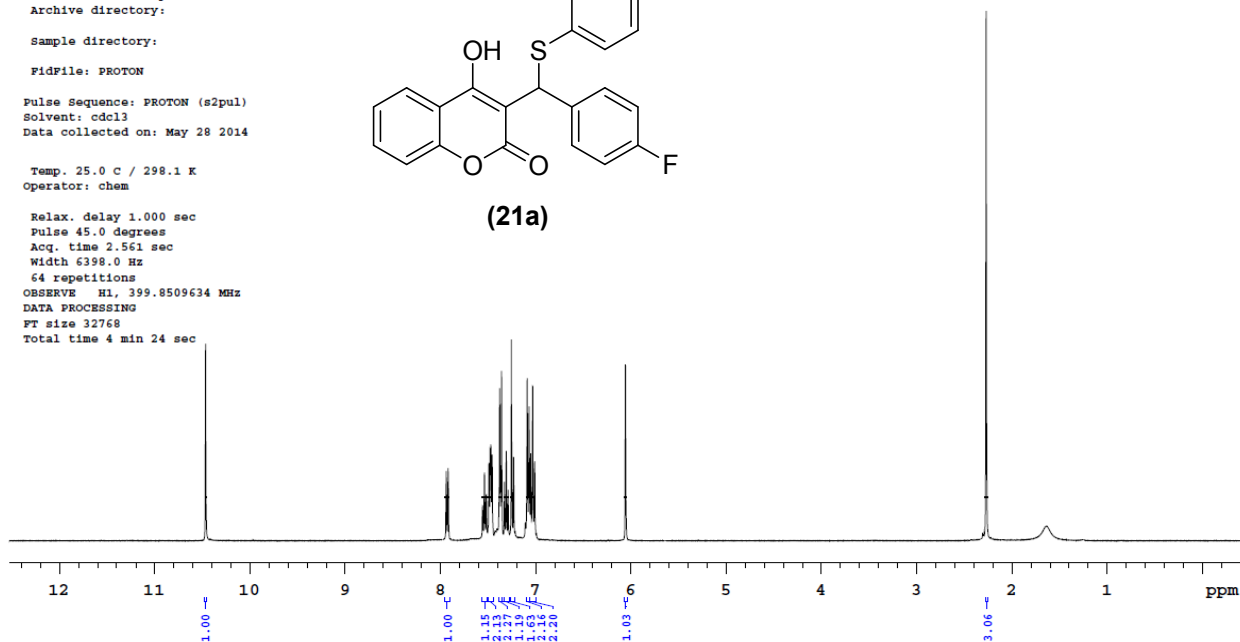

**<sup>13</sup>C NMR (100 MHz, CDCl<sub>3</sub>): 3-((4-fluorophenyl)(p-tolylthio)methyl)-4-hydroxy-2H-chromen-2-one (21a)**

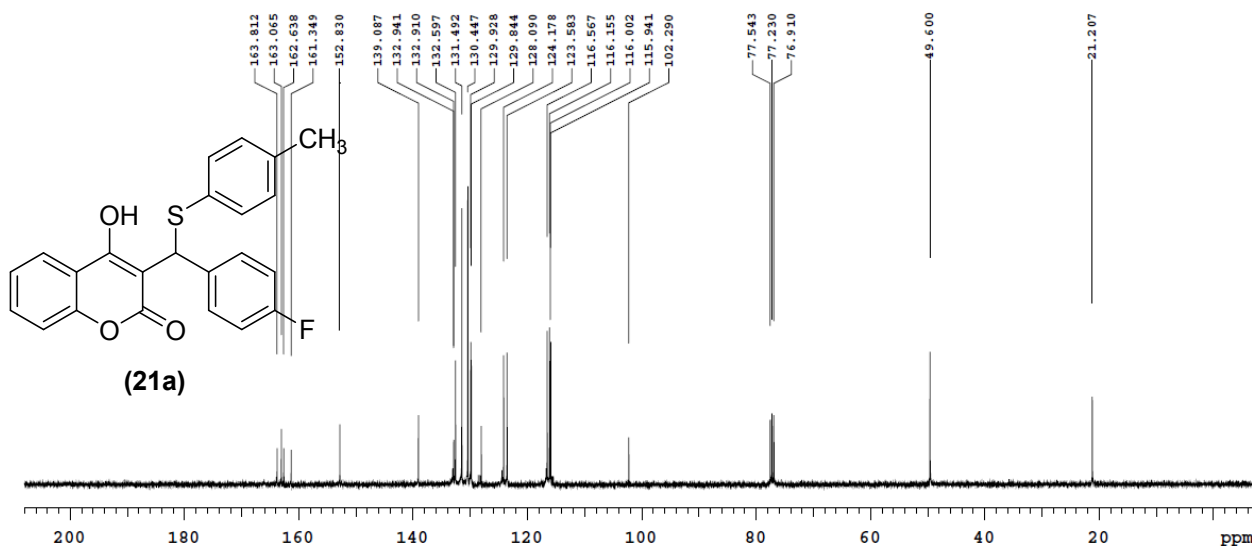

|                                                                                                                                     |                                                                                                                            |                                                                                            |                                                                                                             |
|-------------------------------------------------------------------------------------------------------------------------------------|----------------------------------------------------------------------------------------------------------------------------|--------------------------------------------------------------------------------------------|-------------------------------------------------------------------------------------------------------------|
| <b>PULSE SEQUENCE</b><br>Relax. delay 1.000 sec<br>Pulse 45.0 degrees<br>Acq. time 1.304 sec<br>Width 25125.6 Hz<br>568 repetitions | <b>OBSERVE C13, 100.5425962</b><br><b>DECOUPLE H1, 399.8529994</b><br>Power 42 dB<br>continuously on<br>WALTZ-16 modulated | <b>DATA PROCESSING</b><br>Line broadening 0.5 Hz<br>FT size 65536<br>Total time 21 minutes | <b>AD_DD_10_13C</b><br>Solvent: cdcl3<br>Temp. 25.0 c / 298.1 K<br>Operator: chem<br>Mercury-400 *IITG-NMR* |
|-------------------------------------------------------------------------------------------------------------------------------------|----------------------------------------------------------------------------------------------------------------------------|--------------------------------------------------------------------------------------------|-------------------------------------------------------------------------------------------------------------|

**<sup>1</sup>H NMR (400 MHz, CDCl<sub>3</sub>): 4-hydroxy-3-((4-nitrophenyl)(p-tolylthio)methyl)-2H-chromen-2-one (22a)**

AD\_DD\_3\_1H  
 Sample Name:  
 AD\_DD\_3\_1H  
 Data Collected on:  
 IITG-NMR-mercury400  
 Archive directory:  
 /export/home/chempack/vnmrsys/data  
 Sample directory:  
 Fidfile: PROTON  
 Pulse Sequence: PROTON (s2pul)  
 Solvent: cdcl3  
 Data collected on: Jun 3 2014  
 Temp. 25.0 c / 298.1 K  
 Operator: chem  
 Relax. delay 1.000 sec  
 Pulse 45.0 degrees  
 Acq. time 2.561 sec  
 Width 6398.0 Hz  
 64 repetitions  
 OBSERVE H1, 399.8509634 MHz  
 DATA PROCESSING  
 FT size 32768  
 Total time 4 min 24 sec

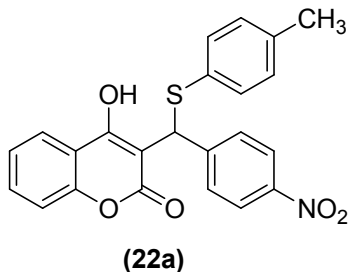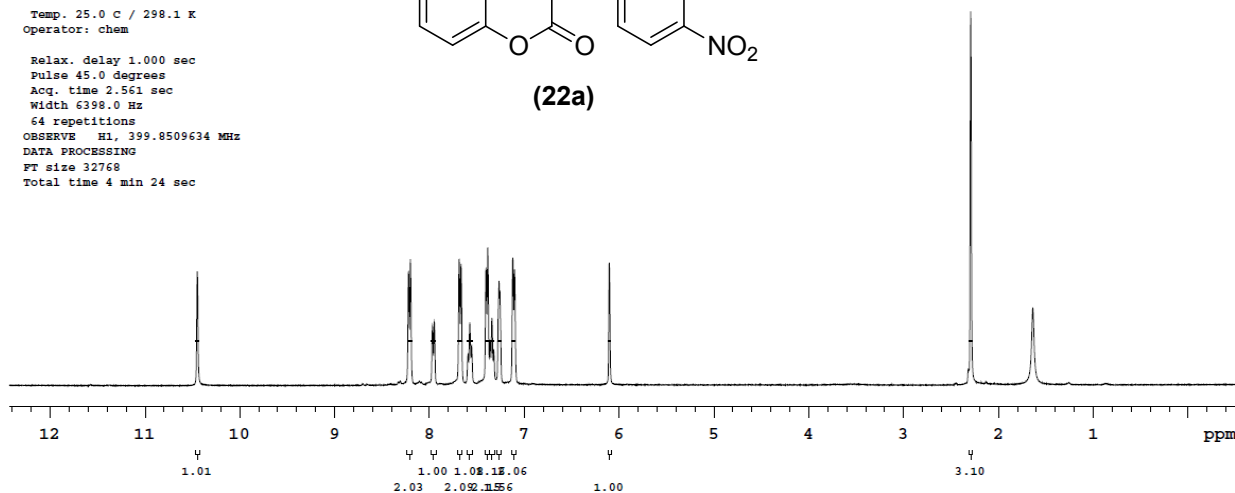

**<sup>13</sup>C NMR (100 MHz, CDCl<sub>3</sub>): 4-hydroxy-3-((4-nitrophenyl)(p-tolylthio)methyl)-2H-chromen-2-one (22a)**

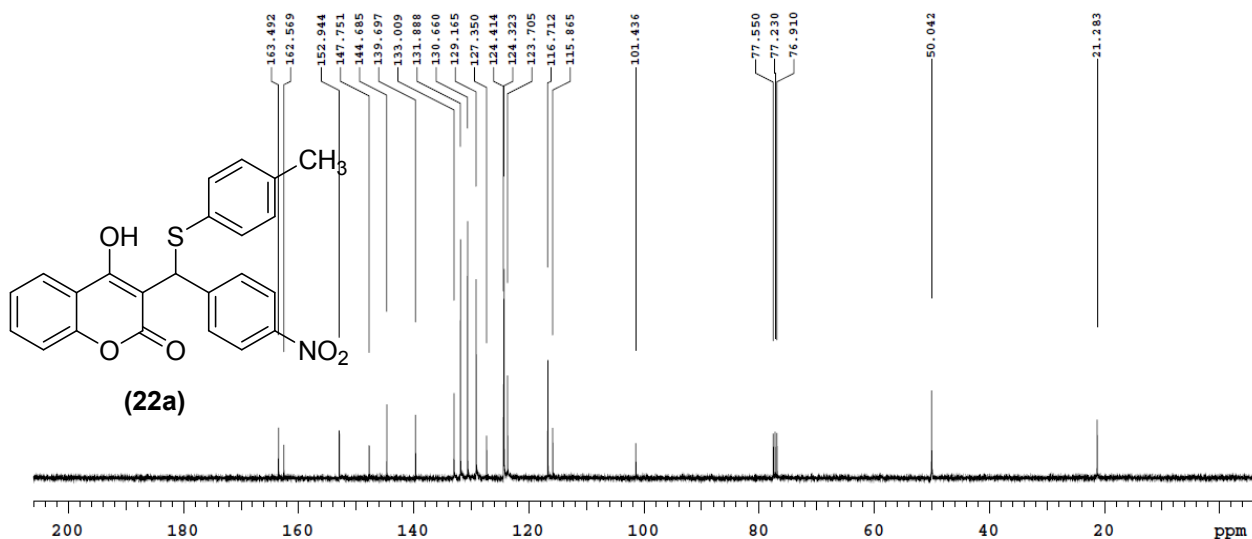

|                                                                                                                              |                                                                                                              |                                                                                     |                                                                                                     |
|------------------------------------------------------------------------------------------------------------------------------|--------------------------------------------------------------------------------------------------------------|-------------------------------------------------------------------------------------|-----------------------------------------------------------------------------------------------------|
| PULSE SEQUENCE<br>Relax. delay 1.000 sec<br>Pulse 45.0 degrees<br>Acq. time 1.304 sec<br>Width 25125.6 Hz<br>592 repetitions | OBSERVE C13, 100.5425909<br>DECOUPLE H1, 399.8529994<br>Power 42 dB<br>continuously on<br>WALTZ-16 modulated | DATA PROCESSING<br>Line broadening 0.5 Hz<br>FT size 65536<br>Total time 22 minutes | AD_DD_3_13C<br>Solvent: cdcl3<br>Temp. 25.0 C / 298.1 K<br>Operator: chem<br>Mercury-400 "IITG-NMR" |
|------------------------------------------------------------------------------------------------------------------------------|--------------------------------------------------------------------------------------------------------------|-------------------------------------------------------------------------------------|-----------------------------------------------------------------------------------------------------|

**<sup>1</sup>H NMR (400 MHz, CDCl<sub>3</sub>): 3-((2-chlorophenyl)(p-tolylthio)methyl)-4-hydroxy-2H-chromen-2-one (23a)**

AD\_DD\_22\_1H  
 Sample Name:  
 AD\_DD\_22\_1H  
 Data Collected on:  
 IITG-NMR-mercury400  
 Archive directory:  
 /home/chem/data/study  
 Sample directory:  
 NB-3PIC-LIG-Zn4-1H-01  
 FidFile: PROTON

Pulse Sequence: PROTON (s2pul)  
 Solvent: cdcl3  
 Data collected on: Apr 14 2014

Temp. 25.0 C / 298.1 K  
 Operator: chem

Relax. delay 1.000 sec  
 Pulse 45.0 degrees  
 Acq. time 2.561 sec  
 Width 6398.0 Hz  
 64 repetitions  
 OBSERVE H1, 399.8509634 MHz  
 DATA PROCESSING  
 FT size 32768  
 Total time 4 min 24 sec

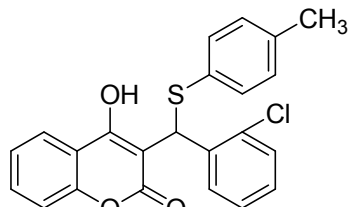

(23a)

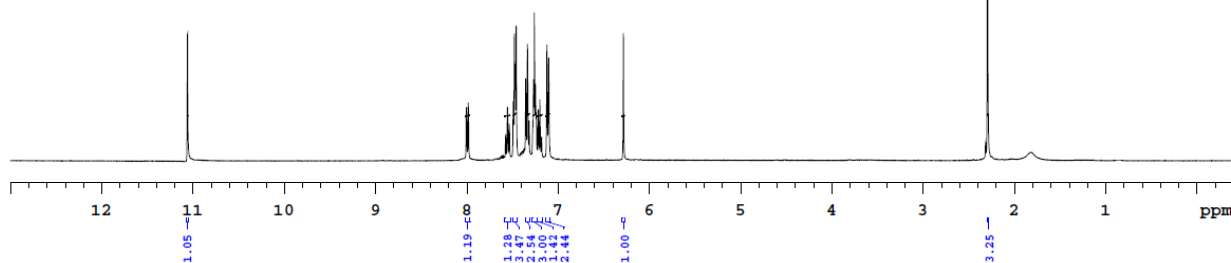

**<sup>13</sup>C NMR (100 MHz, CDCl<sub>3</sub>): 3-((2-chlorophenyl)(p-tolylthio)methyl)-4-hydroxy-2H-chromen-2-one (23a)**

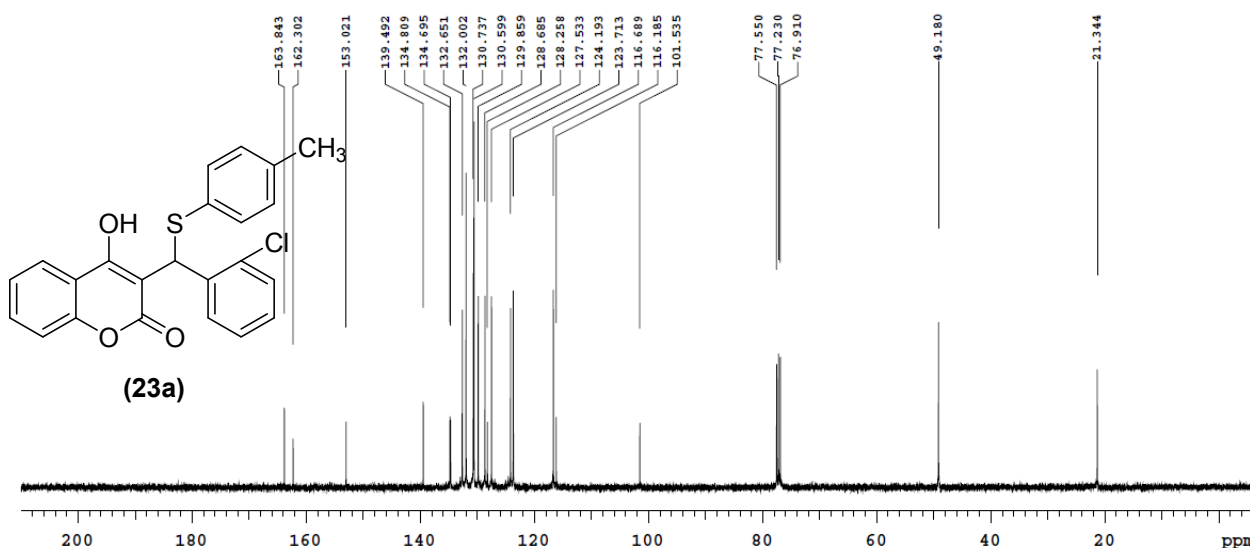

|                                                                                                                               |                                                                                                              |                                                                                     |                                                                                                      |
|-------------------------------------------------------------------------------------------------------------------------------|--------------------------------------------------------------------------------------------------------------|-------------------------------------------------------------------------------------|------------------------------------------------------------------------------------------------------|
| PULSE SEQUENCE<br>Relax. delay 1.000 sec<br>Pulse 45.0 degrees<br>Acq. time 1.304 sec<br>Width 25125.6 Hz<br>1040 repetitions | OBSERVE C13, 100.5425878<br>DECOUPLE H1, 399.8529994<br>Power 42 dB<br>continuously on<br>WALTZ-16 modulated | DATA PROCESSING<br>Line broadening 0.5 Hz<br>FT size 65536<br>Total time 39 minutes | AD_DD_22_13C<br>Solvent: cdcl3<br>Temp. 25.0 C / 298.1 K<br>Operator: chem<br>Mercury-400 *IITG-NMR* |
|-------------------------------------------------------------------------------------------------------------------------------|--------------------------------------------------------------------------------------------------------------|-------------------------------------------------------------------------------------|------------------------------------------------------------------------------------------------------|

<sup>1</sup>H NMR (400 MHz, CDCl<sub>3</sub>): 4-hydroxy-3-((2-nitrophenyl)(p-tolylthio)methyl)-2H-chromen-2-one (24a)

AD\_DD\_23\_1H

Sample Name:  
AD\_DD\_23\_1H  
Data Collected on:  
IITG-NMR-mercury400  
Archive directory:  
/export/home/chempack/vnmrSYS/data  
Sample directory:  
FidFile: PROTON  
Pulse Sequence: PROTON (s2pul)  
Solvent: cdcl3  
Data collected on: Apr 14 2014

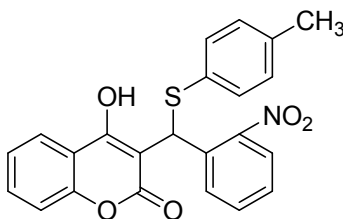

(24a)

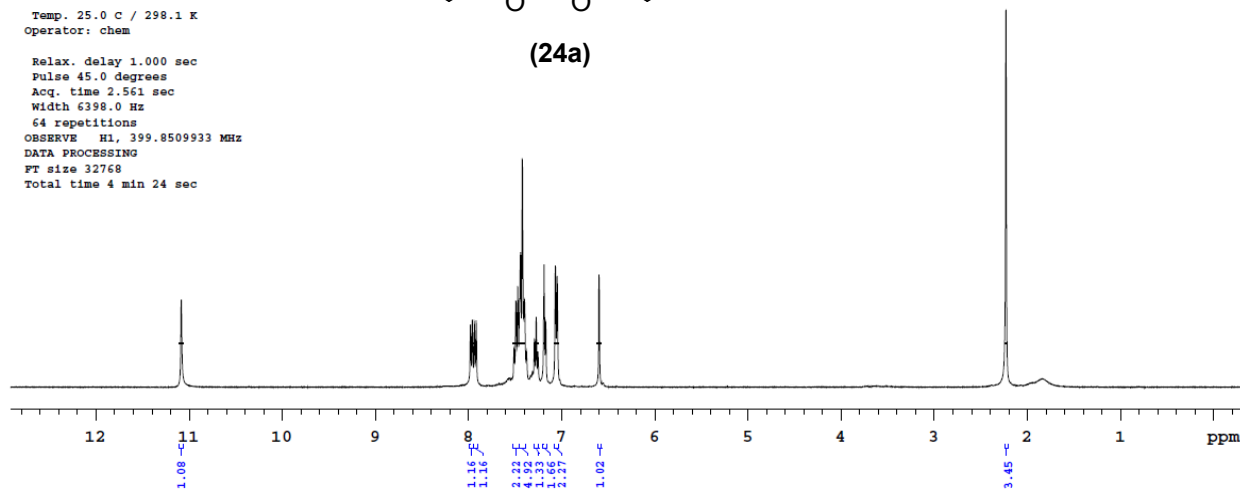

<sup>13</sup>C NMR (100 MHz, CDCl<sub>3</sub>): 4-hydroxy-3-((2-nitrophenyl)(p-tolylthio)methyl)-2H-chromen-2-one (24a)

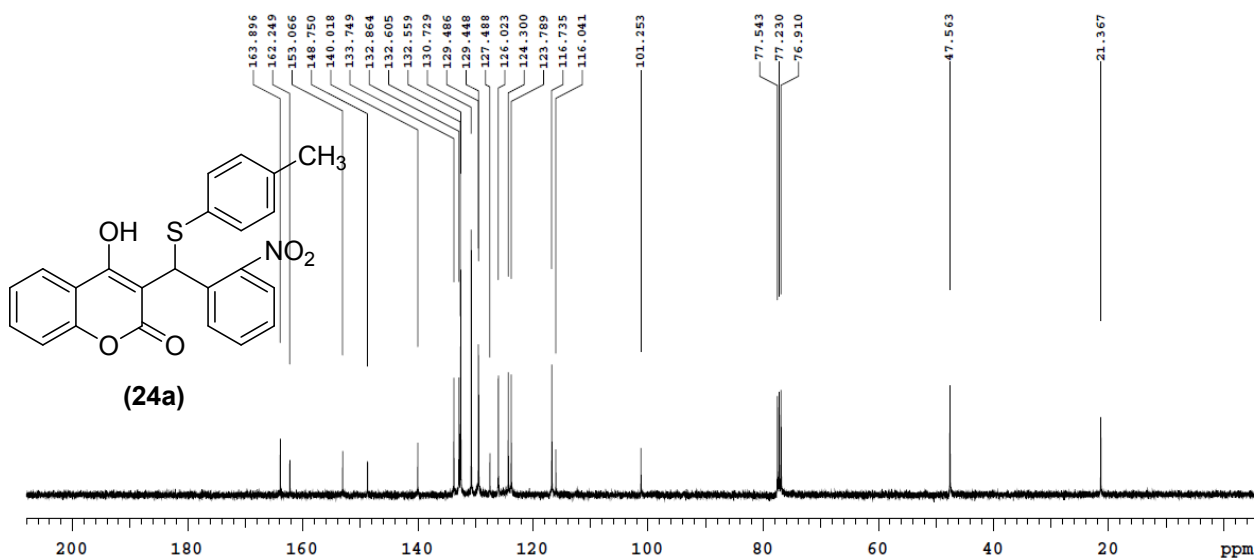

|                                                                                                                                           |                                                                                                                         |                                                                                               |                                                                                                                 |
|-------------------------------------------------------------------------------------------------------------------------------------------|-------------------------------------------------------------------------------------------------------------------------|-----------------------------------------------------------------------------------------------|-----------------------------------------------------------------------------------------------------------------|
| <p>PULSE SEQUENCE<br/>Relax. delay 1.000 sec<br/>Pulse 45.0 degrees<br/>Acq. time 1.304 sec<br/>Width 25125.6 Hz<br/>1005 repetitions</p> | <p>OBSERVE C13, 100.5425878<br/>DECOUPLE H1, 399.8529994<br/>Power 42 dB<br/>continuously on<br/>WALTZ-16 modulated</p> | <p>DATA PROCESSING<br/>Line broadening 0.5 Hz<br/>FT size 65536<br/>Total time 38 minutes</p> | <p>AD_DD_23_13C<br/>Solvent: cdcl3<br/>Temp. 25.0 C / 298.1 K<br/>Operator: chem<br/>Mercury-400 "IITG-NMR"</p> |
|-------------------------------------------------------------------------------------------------------------------------------------------|-------------------------------------------------------------------------------------------------------------------------|-----------------------------------------------------------------------------------------------|-----------------------------------------------------------------------------------------------------------------|



**<sup>1</sup>H NMR (400 MHz, CDCl<sub>3</sub>): 3-((2,4-dimethoxyphenyl)(p-tolylthio)methyl)-4-hydroxy-2H-chromen-2-one (25a)**

AD\_DD\_13\_1H

Sample Name:  
AD\_DD\_13\_1H  
Data Collected on:  
IITG-NMR-mercury400  
Archive directory:  
Sample directory:  
Fidfile: PROTON  
Pulse Sequence: PROTON (s2pul)  
Solvent: cdcl3  
Data collected on: Jul 3 2014

Temp. 25.0 C / 298.1 K  
Operator: chem

Relax. delay 1.000 sec  
Pulse 45.0 degrees  
Acq. time 2.561 sec  
Width 6398.0 Hz  
32 repetitions  
OBSERVE H1, 399.8509634 MHz  
DATA PROCESSING  
FT size 32768  
Total time 2 min 12 sec

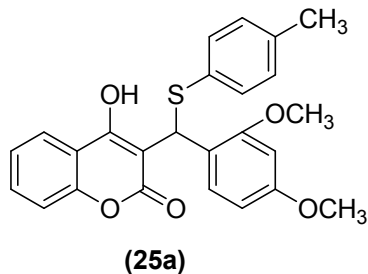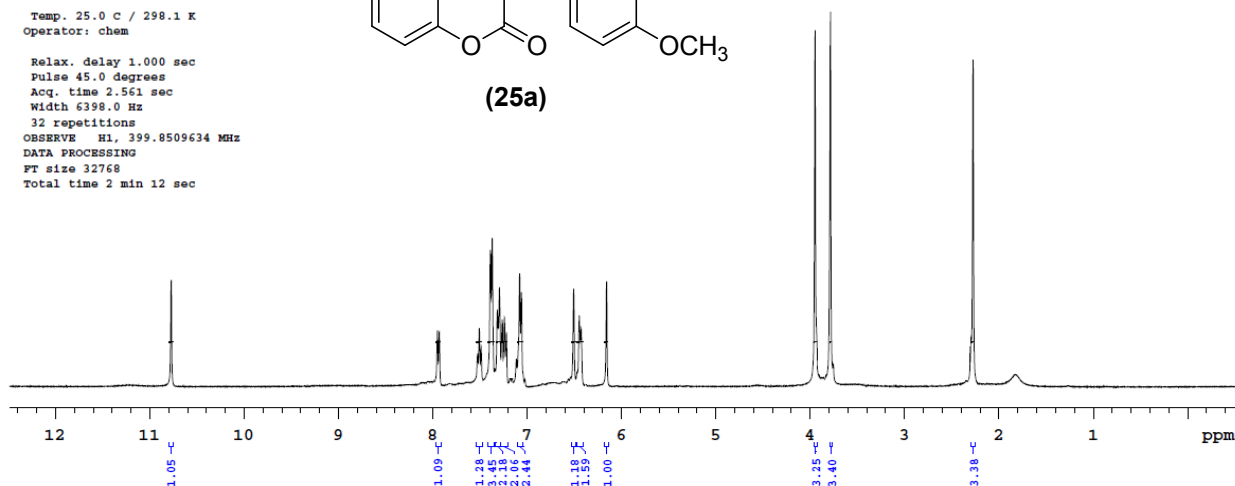

**<sup>13</sup>C NMR (100 MHz, CDCl<sub>3</sub>): 3-((2,4-dimethoxyphenyl)(p-tolylthio)methyl)-4-hydroxy-2H-chromen-2-one (25a)**

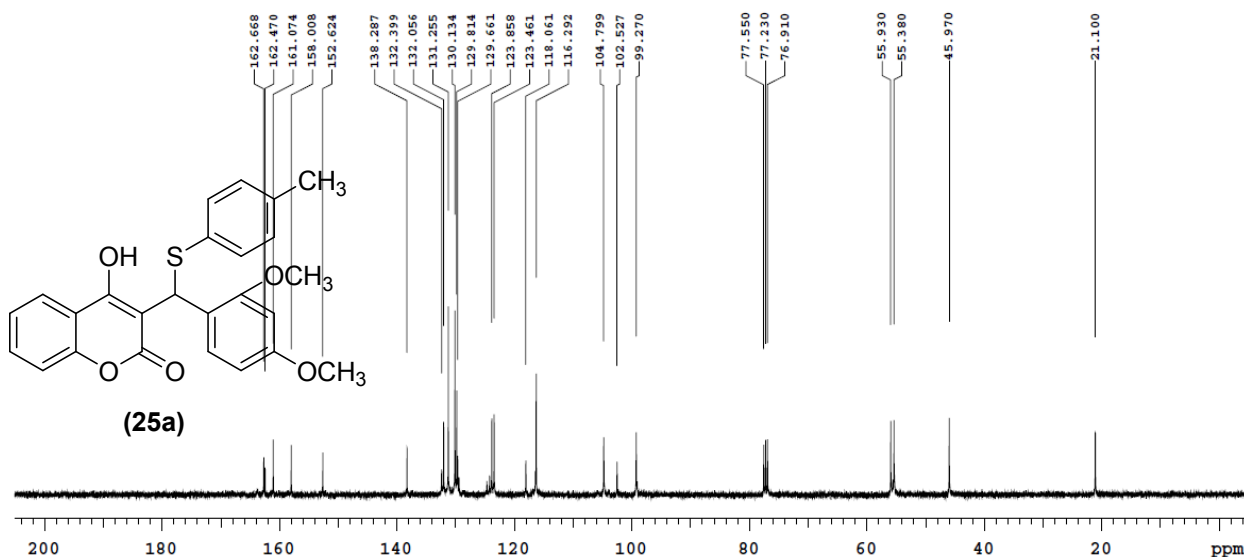

|                                                                                                                                          |                                                                                                                         |                                                                                               |                                                                                                                                        |
|------------------------------------------------------------------------------------------------------------------------------------------|-------------------------------------------------------------------------------------------------------------------------|-----------------------------------------------------------------------------------------------|----------------------------------------------------------------------------------------------------------------------------------------|
| <p>PULSE SEQUENCE<br/>Relax. delay 1.000 sec<br/>Pulse 45.0 degrees<br/>Acq. time 1.304 sec<br/>Width 25125.6 Hz<br/>285 repetitions</p> | <p>OBSERVE C13, 100.5426062<br/>DECOUPLE H1, 399.8529994<br/>Power 42 db<br/>continuously on<br/>WALTZ-16 modulated</p> | <p>DATA PROCESSING<br/>Line broadening 0.5 Hz<br/>FT size 65536<br/>Total time 10 minutes</p> | <p>AD_DD_13_13C<br/>Solvent: cdcl3<br/>Temp. 25.0 C / 298.1 K<br/>Operator: chem<br/>File: AD_DD_13_13C<br/>Mercury-400 *IITG-NMR*</p> |
|------------------------------------------------------------------------------------------------------------------------------------------|-------------------------------------------------------------------------------------------------------------------------|-----------------------------------------------------------------------------------------------|----------------------------------------------------------------------------------------------------------------------------------------|

**<sup>1</sup>H NMR (400 MHz, CDCl<sub>3</sub>): 4-hydroxy-3-(naphthalen-2-yl(p-tolylthio)methyl)-2H-chromen-2-one (26a)**

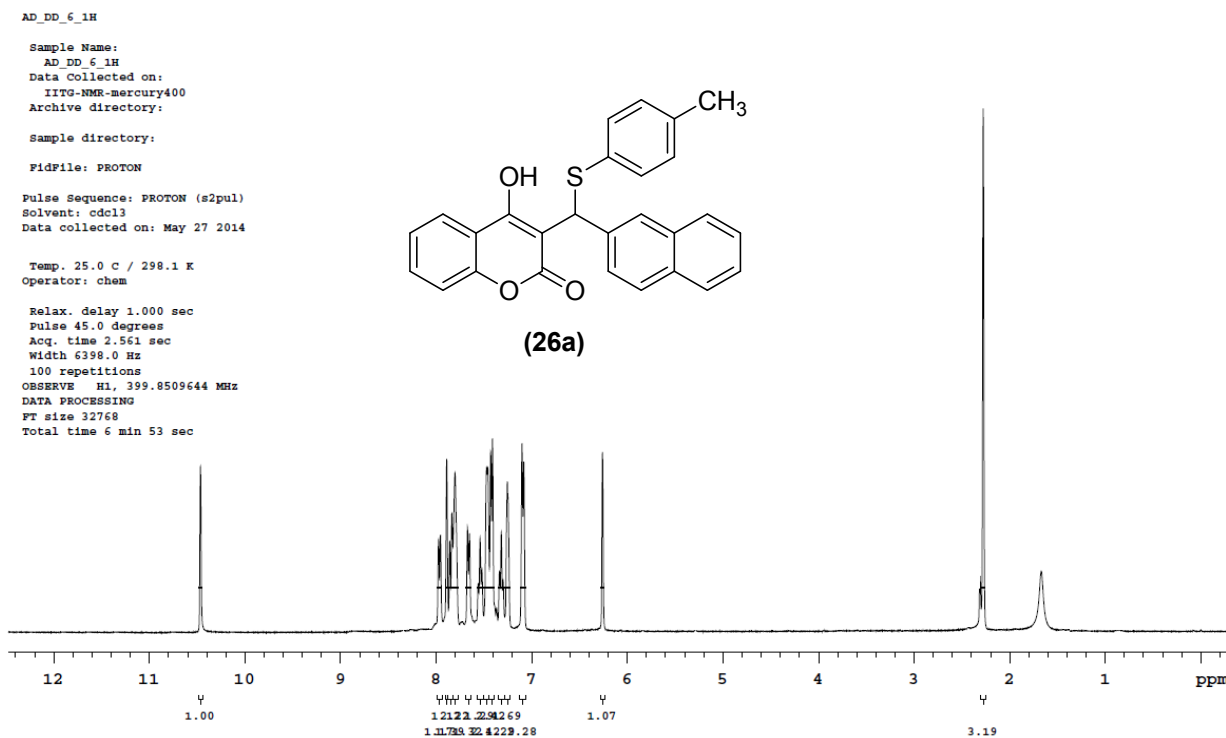

**<sup>13</sup>C NMR (100 MHz, CDCl<sub>3</sub>): 4-hydroxy-3-(naphthalen-2-yl(p-tolylthio)methyl)-2H-chromen-2-one (26a)**

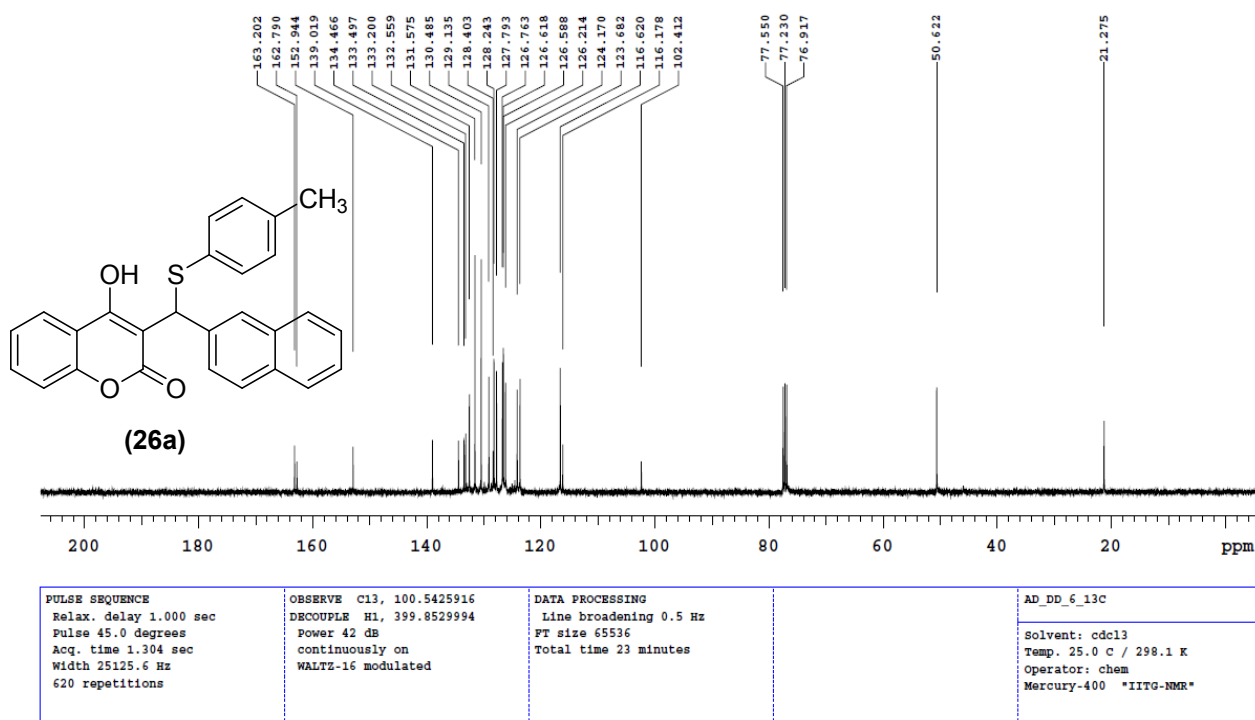

**<sup>1</sup>H NMR (400 MHz, CDCl<sub>3</sub>): 3-(((4-bromophenyl)thio)(4-methoxyphenyl)methyl)-4-hydroxy-2H-chromen-2-one (27a)**

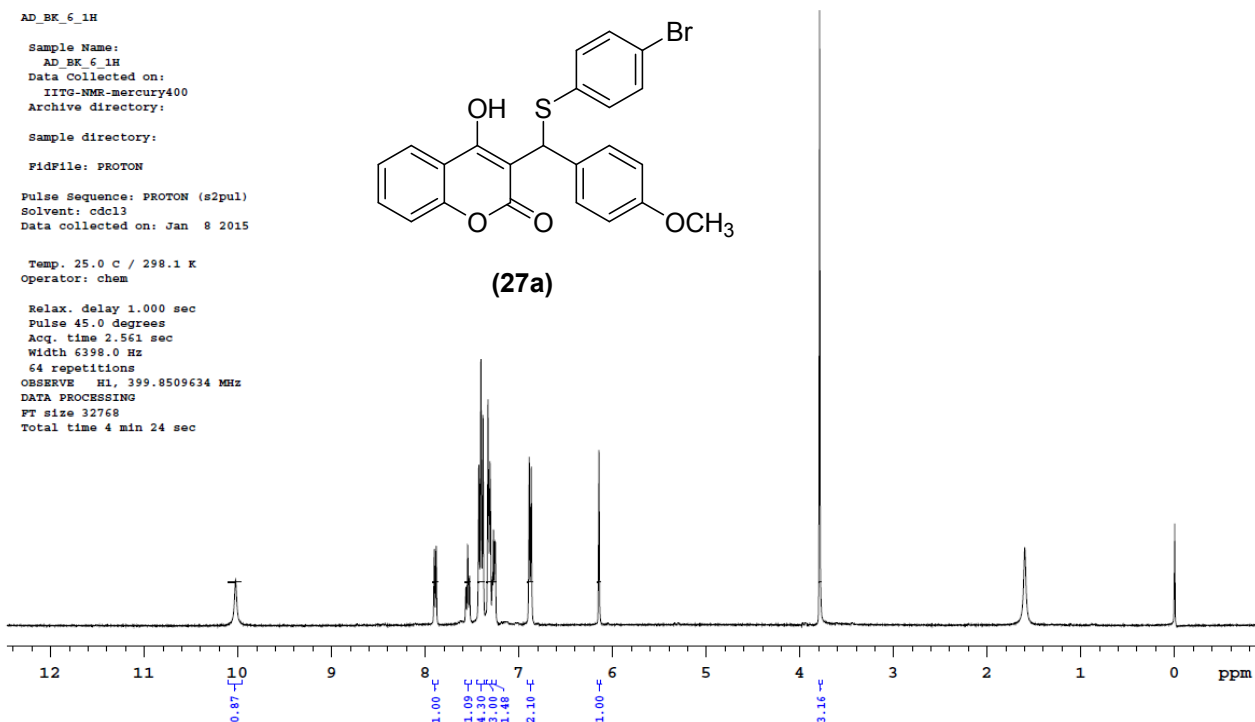

**<sup>13</sup>C NMR (100 MHz, CDCl<sub>3</sub>): 3-(((4-bromophenyl)thio)(4-methoxyphenyl)methyl)-4-hydroxy-2H-chromen-2-one (27a)**

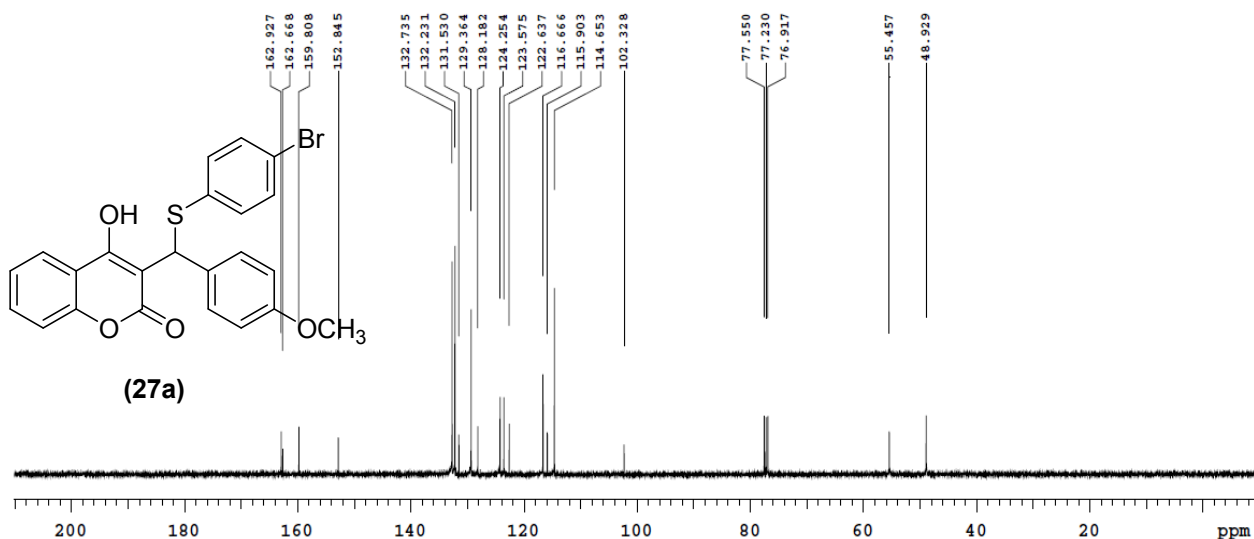

|                                                                                                                                          |                                                                                                                         |                                                                                               |                                                                                                                |
|------------------------------------------------------------------------------------------------------------------------------------------|-------------------------------------------------------------------------------------------------------------------------|-----------------------------------------------------------------------------------------------|----------------------------------------------------------------------------------------------------------------|
| <p>PULSE SEQUENCE<br/>Relax. delay 1.000 sec<br/>Pulse 45.0 degrees<br/>Acq. time 1.304 sec<br/>Width 25125.6 Hz<br/>288 repetitions</p> | <p>OBSERVE C13, 100.5425924<br/>DECOUPLE H1, 399.8529994<br/>Power 42 dB<br/>continuously on<br/>WALTZ-16 modulated</p> | <p>DATA PROCESSING<br/>Line broadening 0.5 Hz<br/>FT size 65536<br/>Total time 11 minutes</p> | <p>AD_BK_6_13C<br/>Solvent: cdcl3<br/>Temp. 25.0 C / 298.1 K<br/>Operator: chem<br/>Mercury-400 *IITG-NMR*</p> |
|------------------------------------------------------------------------------------------------------------------------------------------|-------------------------------------------------------------------------------------------------------------------------|-----------------------------------------------------------------------------------------------|----------------------------------------------------------------------------------------------------------------|

<sup>1</sup>H NMR (400 MHz, CDCl<sub>3</sub>): 4-(((4-chlorophenyl)thio)(4-hydroxy-2-oxo-2H-chromen-3-yl)methyl)benzonitrile (28a)

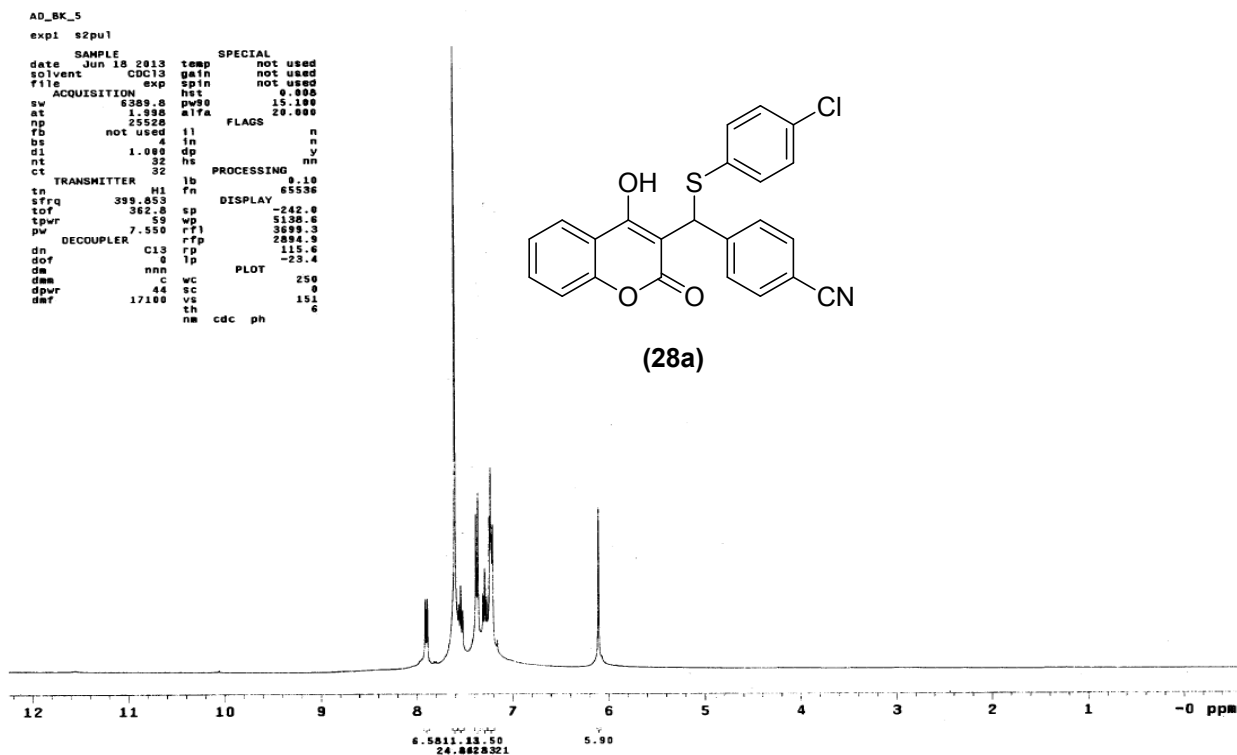

<sup>13</sup>C NMR (100 MHz, CDCl<sub>3</sub> + DMSO): 4-(((4-chlorophenyl)thio)(4-hydroxy-2-oxo-2H-chromen-3-yl)methyl)benzonitrile (28a)

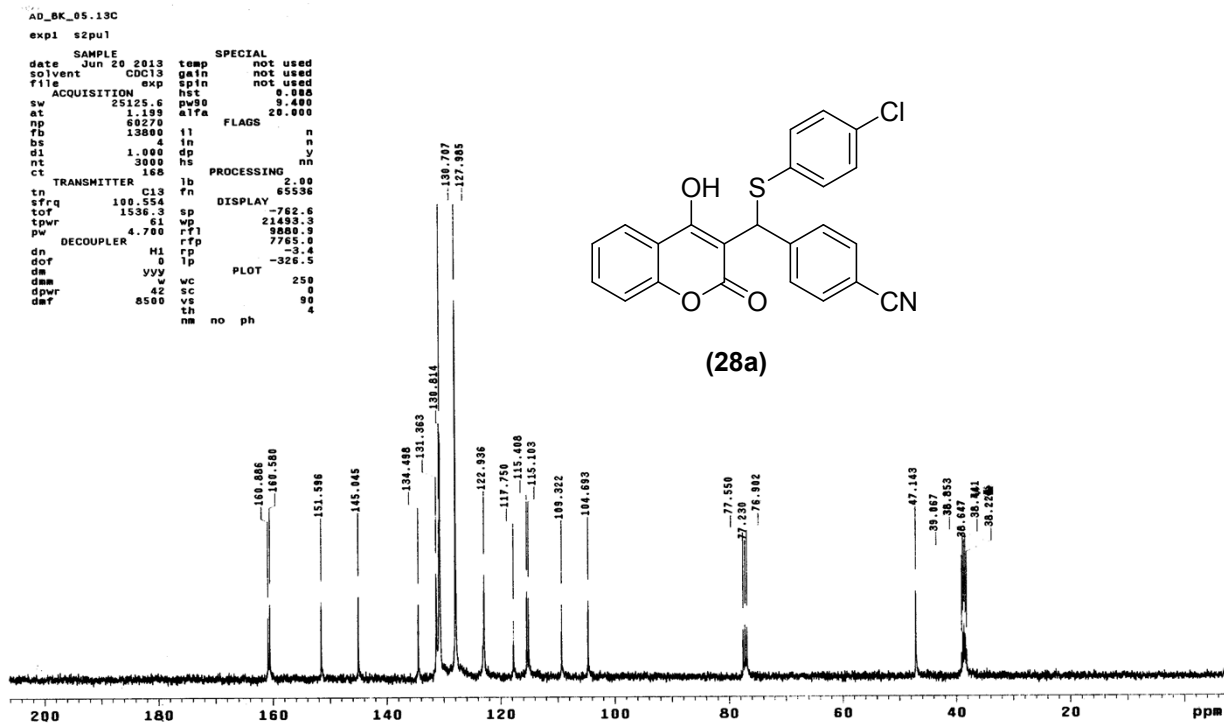

**<sup>1</sup>H NMR (400 MHz, CDCl<sub>3</sub>): 3-((benzylthio)(thiophen-2-yl)methyl)-4-hydroxy-2H-chromen-2-one (29a)**

AD\_BK\_3\_1H  
 Sample Name:  
 AD\_BK\_3\_1H  
 Data Collected on:  
 IITG-NMR-mercury400  
 Archive directory:  
 Sample directory:  
 Fidfile: PROTON  
 Pulse Sequence: PROTON (s2pul)  
 Solvent: cdcl3  
 Data collected on: Apr 1 2015  
 Temp. 25.0 c / 298.1 K  
 Operator: chem  
 Relax. delay 1.000 sec  
 Pulse 45.0 degrees  
 Acq. time 2.561 sec  
 Width 6398.0 Hz  
 32 repetitions  
 OBSERVE H1, 399.8509634 MHz  
 DATA PROCESSING  
 FT size 32768  
 Total time 2 min 12 sec

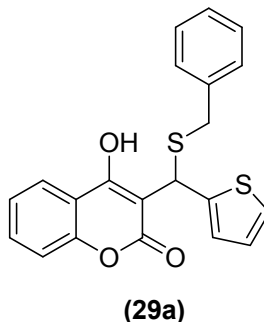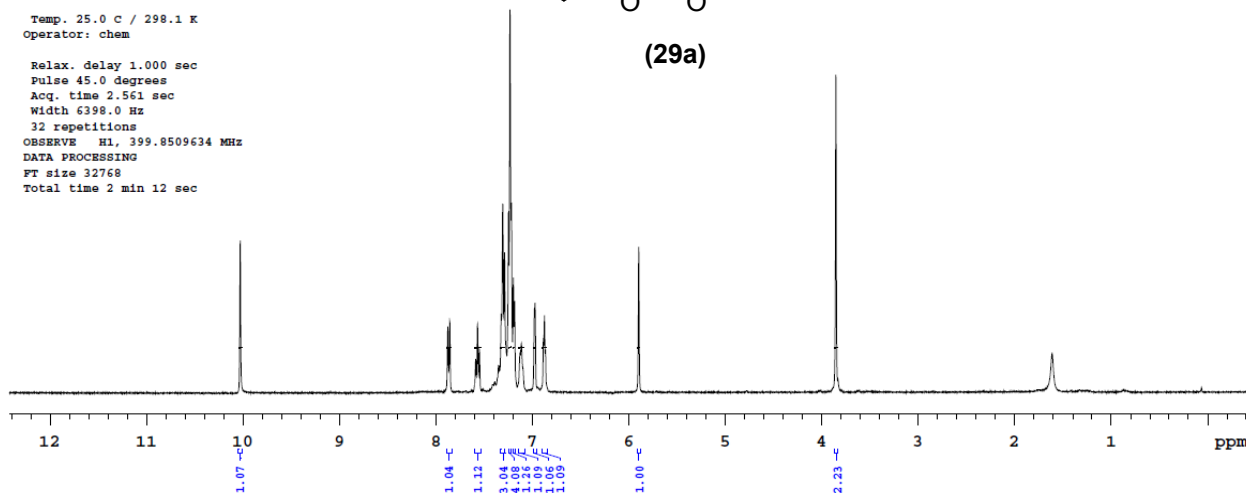

**<sup>13</sup>C NMR (100 MHz, CDCl<sub>3</sub>): 3-((benzylthio)(thiophen-2-yl)methyl)-4-hydroxy-2H-chromen-2-one (29a)**

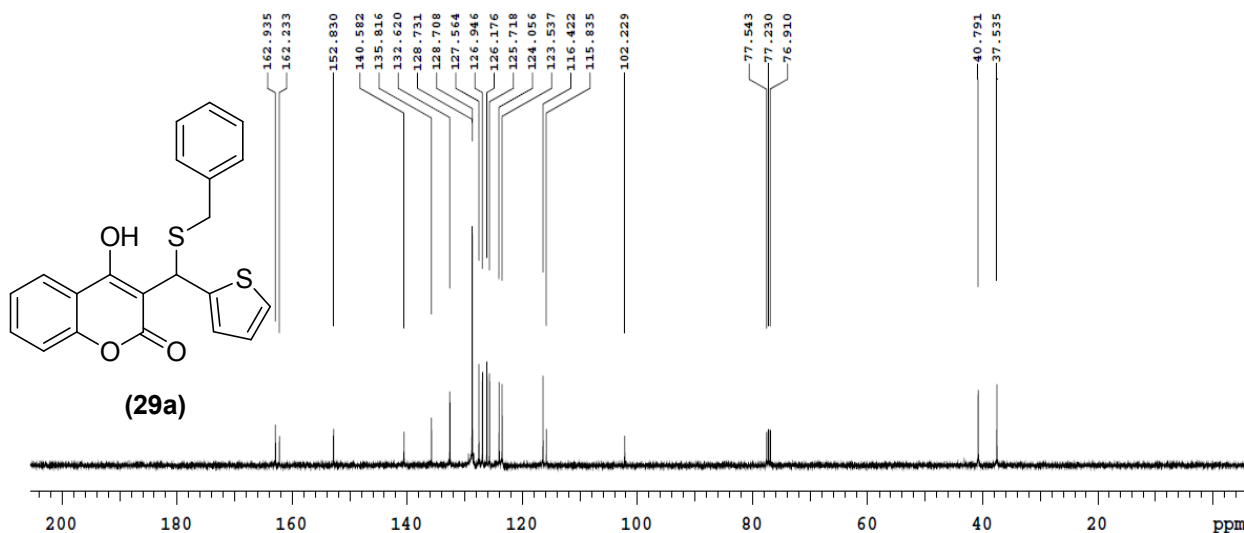

|                                                                                                                                                                                       |                                                                                                                                                             |                                                                                                                         |                                                                                                                                                    |
|---------------------------------------------------------------------------------------------------------------------------------------------------------------------------------------|-------------------------------------------------------------------------------------------------------------------------------------------------------------|-------------------------------------------------------------------------------------------------------------------------|----------------------------------------------------------------------------------------------------------------------------------------------------|
| <p>PULSE SEQUENCE<br/>         Relax. delay 1.000 sec<br/>         Pulse 45.0 degrees<br/>         Acq. time 1.304 sec<br/>         Width 25125.6 Hz<br/>         100 repetitions</p> | <p>OBSERVE C13, 100.5426116<br/>         DECOUPLE H1, 399.8529994<br/>         Power 42 dB<br/>         continuously on<br/>         WALTZ-16 modulated</p> | <p>DATA PROCESSING<br/>         Line broadening 0.5 Hz<br/>         FT size 65536<br/>         Total time 3 minutes</p> | <p>AD_BK_3_13C<br/>         Solvent: cdcl3<br/>         Temp. 25.0 C / 298.1 K<br/>         Operator: chem<br/>         Mercury-400 *IITG-NMR*</p> |
|---------------------------------------------------------------------------------------------------------------------------------------------------------------------------------------|-------------------------------------------------------------------------------------------------------------------------------------------------------------|-------------------------------------------------------------------------------------------------------------------------|----------------------------------------------------------------------------------------------------------------------------------------------------|

**<sup>1</sup>H NMR (400 MHz, CDCl<sub>3</sub>): 3-((ethylthio)(pyridin-2-yl)methyl)-4-hydroxy-2H-chromen-2-one (30a)**

AD\_DD\_21\_1H

Sample Name:  
AD\_DD\_21\_1H  
Data Collected on:  
IITG-NMR-mercury400  
Archive directory:  
/export/home/chempack/vnmrSYS/data  
Sample directory:

FidFile: AD\_DD\_21\_1HN

Pulse Sequence: PROTON (s2pul)  
Solvent: cdcl3  
Data collected on: May 17 2014

Temp. 25.0 C / 298.1 K  
Operator: chem

Relax. delay 1.000 sec  
Pulse 45.0 degrees  
Acq. time 5.122 sec  
Width 6398.0 Hz  
32 repetitions  
OBSERVE H1, 399.8509634 MHz  
DATA PROCESSING  
FT size 65536  
Total time 3 min 50 sec

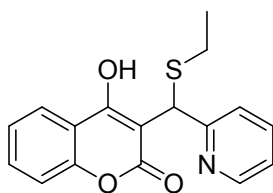

**(30a)**

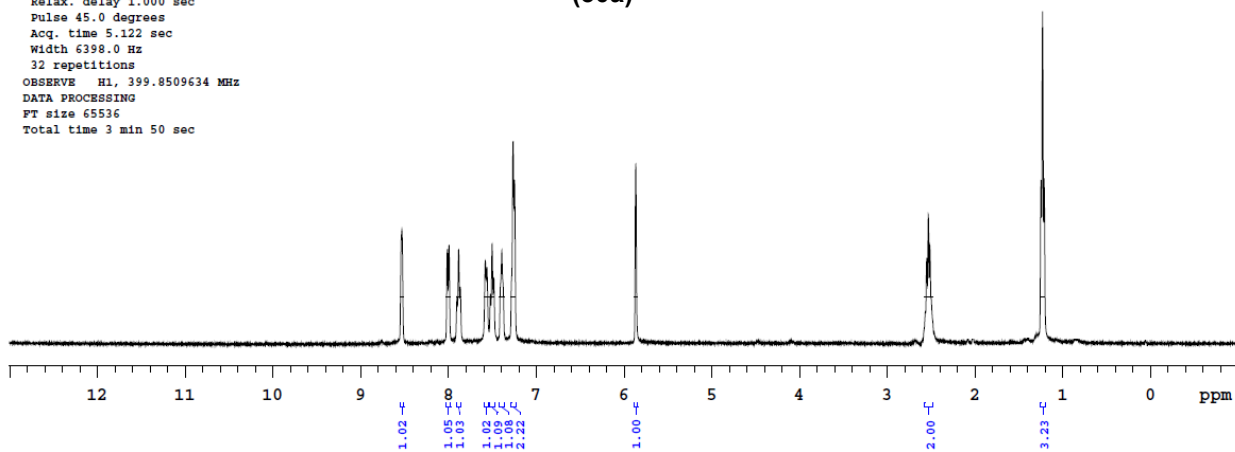

**<sup>13</sup>C NMR (100 MHz, CDCl<sub>3</sub>): 3-((ethylthio)(pyridin-2-yl)methyl)-4-hydroxy-2H-chromen-2-one (30a)**

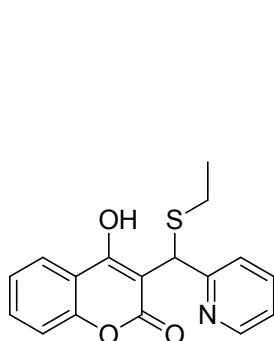

**(30a)**

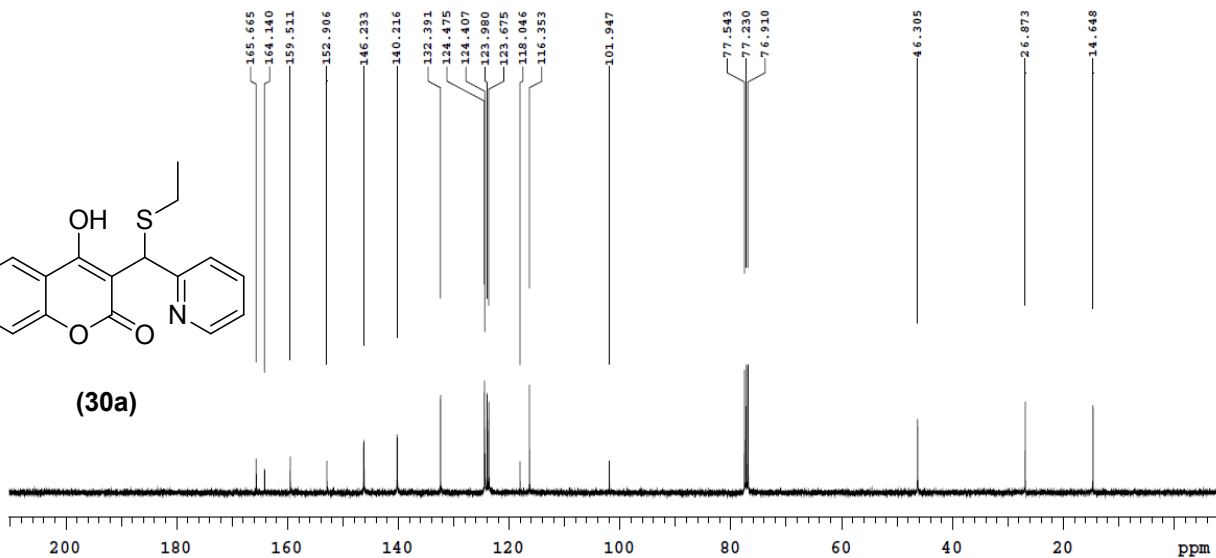

PULSE SEQUENCE  
Relax. delay 1.000 sec  
Pulse 45.0 degrees  
Acq. time 1.304 sec  
Width 25125.6 Hz  
1776 repetitions

OBSERVE C13, 100.5425855  
DECOUPLE H1, 399.8529994  
Power 42 dB  
continuously on  
WALTZ-16 modulated

DATA PROCESSING  
Line broadening 0.5 Hz  
FT size 65536  
Total time 68 minutes

AD\_DD\_21\_13C

Solvent: cdcl3  
Temp. 25.0 C / 298.1 K  
Operator: chem  
Mercury-400 \*IITG-NMR\*

HRMS (ESI) spectra : 3-((ethylthio)(phenyl)methyl)-4-hydroxy-2H-chromen-2-one (1a)

| Sample Name   | Position    | Instrument Name | User Name              |
|---------------|-------------|-----------------|------------------------|
| Inj Vol       | InjPosition | SampleType      | IRM Calibration Status |
| Data Filename | ACQ Method  | Comment         | Acquired Time          |

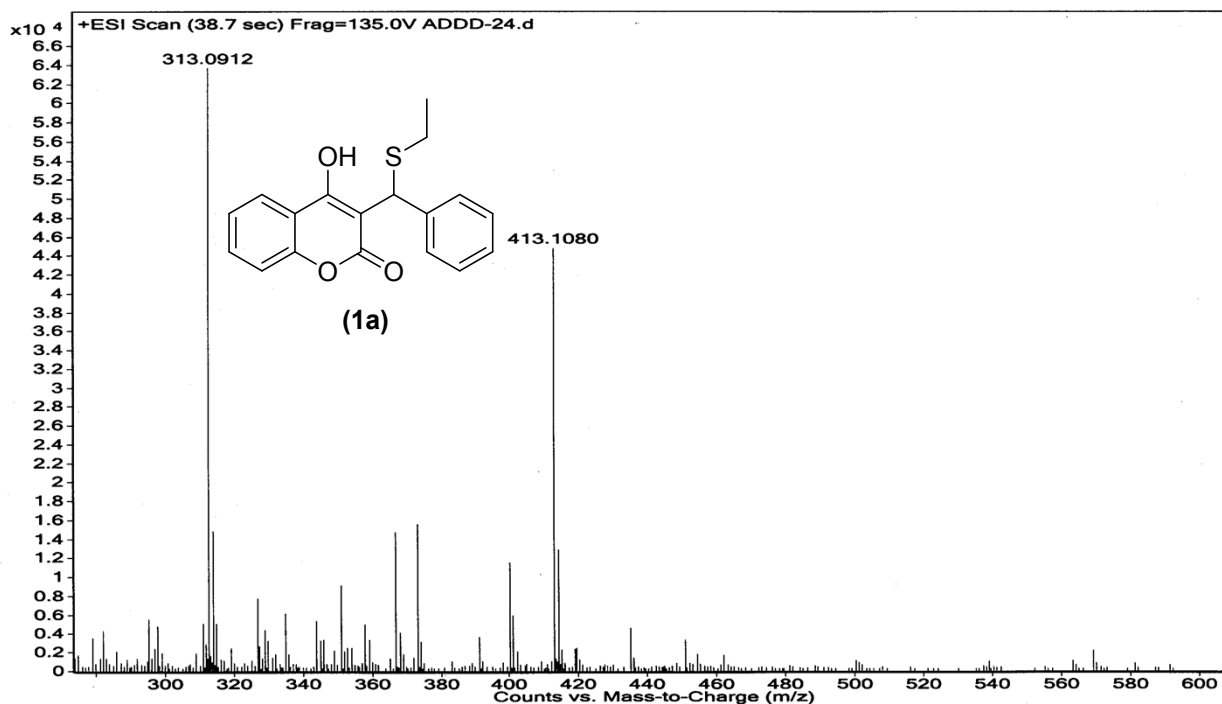

HRMS (ESI) spectra : 4-hydroxy-3-(phenyl(propylthio)methyl)-2H-chromen-2-one (2a)

| Sample Name   | Position    | Instrument Name | User Name              |
|---------------|-------------|-----------------|------------------------|
| Inj Vol       | InjPosition | SampleType      | IRM Calibration Status |
| Data Filename | ACQ Method  | Comment         | Acquired Time          |

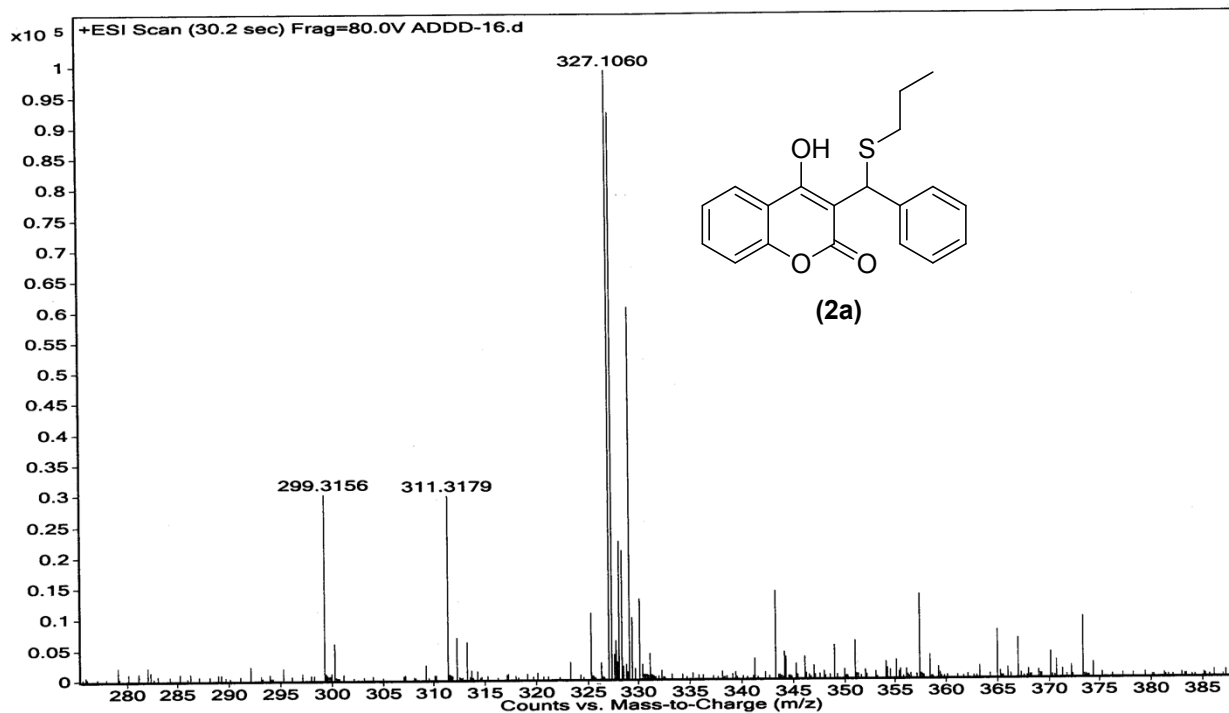

HRMS (APCI) spectra : 3-((benzylthio)(phenyl)methyl)-4-hydroxy-2H-chromen-2-one (3a)

| Sample Name   | Position    | Instrument Name | User Name              |
|---------------|-------------|-----------------|------------------------|
| Inj Vol       | InjPosition | SampleType      | IRM Calibration Status |
| Data Filename | ACQ Method  | Comment         | Acquired Time          |

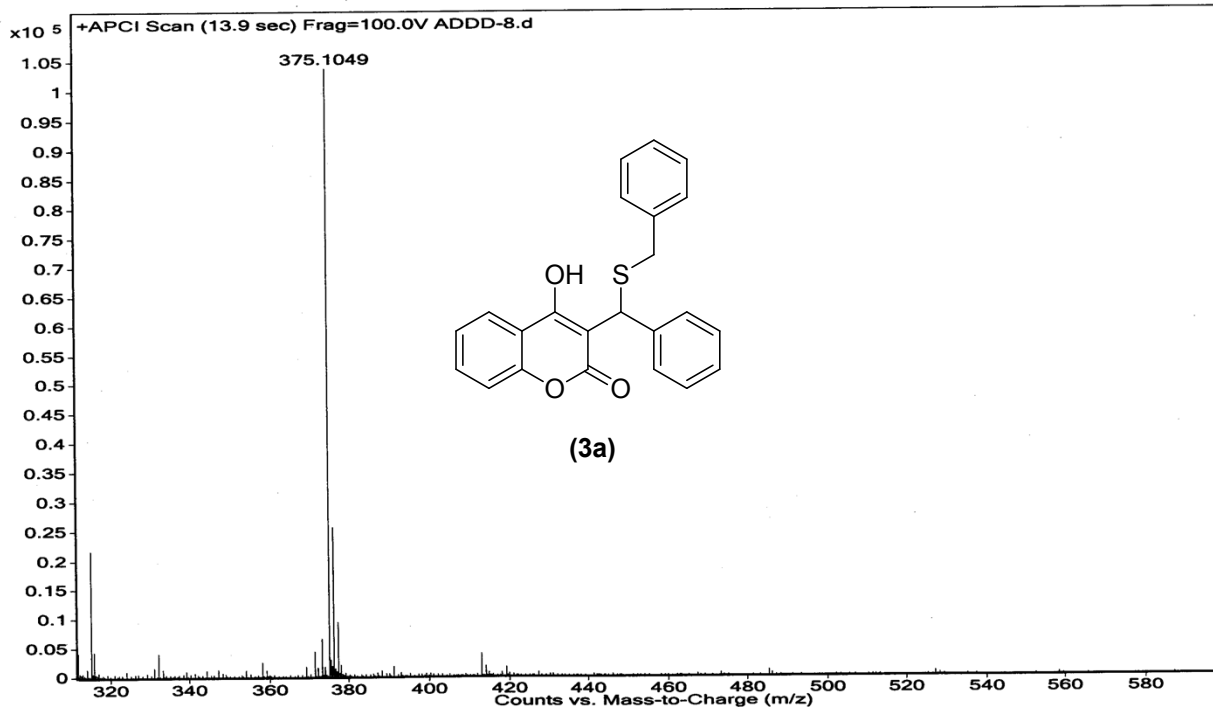

HRMS (ESI) spectra : 3-(((2-chlorobenzyl)thio)(phenyl)methyl)-4-hydroxy-2H-chromen-2-one (4a)

| Sample Name   | Position    | Instrument Name | User Name              |
|---------------|-------------|-----------------|------------------------|
| Inj Vol       | InjPosition | SampleType      | IRM Calibration Status |
| Data Filename | ACQ Method  | Comment         | Acquired Time          |

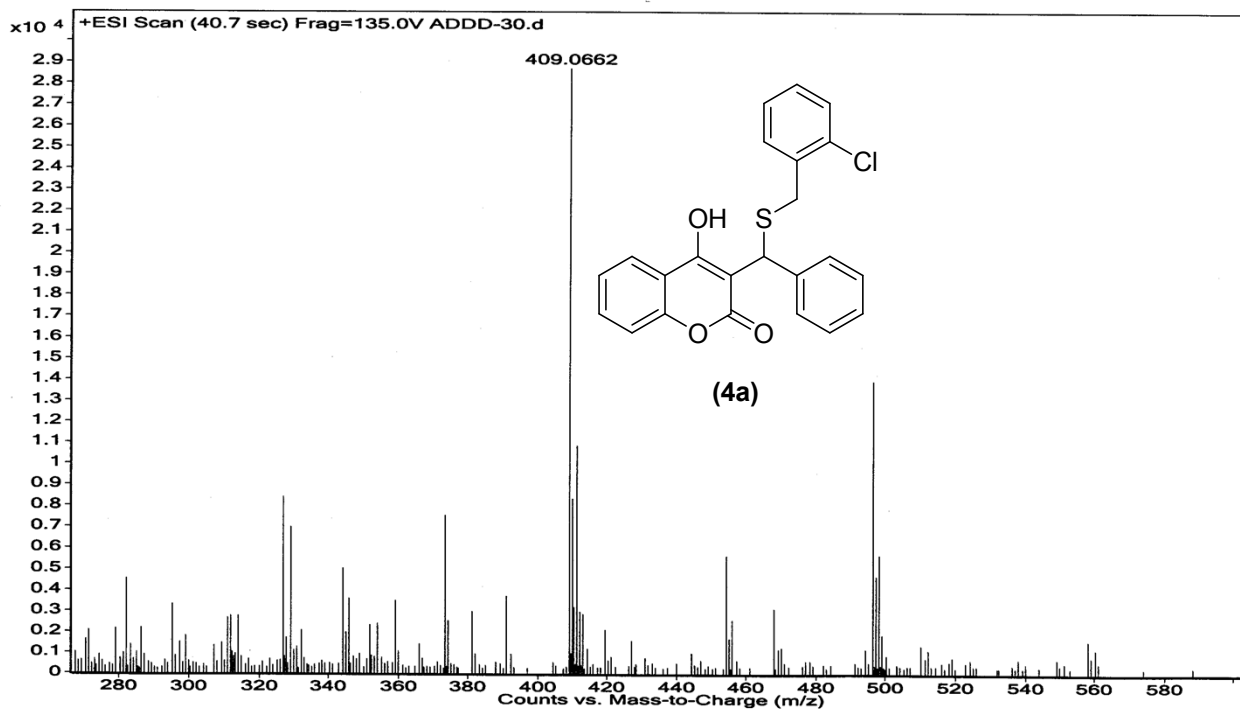



**HRMS (ESI) spectra : 4-hydroxy-3-(phenyl(propylthio)methyl)-2H-chromen-2-one (5a)**

| Sample Name   | Position    | Instrument Name | User Name              |
|---------------|-------------|-----------------|------------------------|
| Inj Vol       | InjPosition | SampleType      | IRM Calibration Status |
| Data Filename | ACQ Method  | Comment         | Acquired Time          |

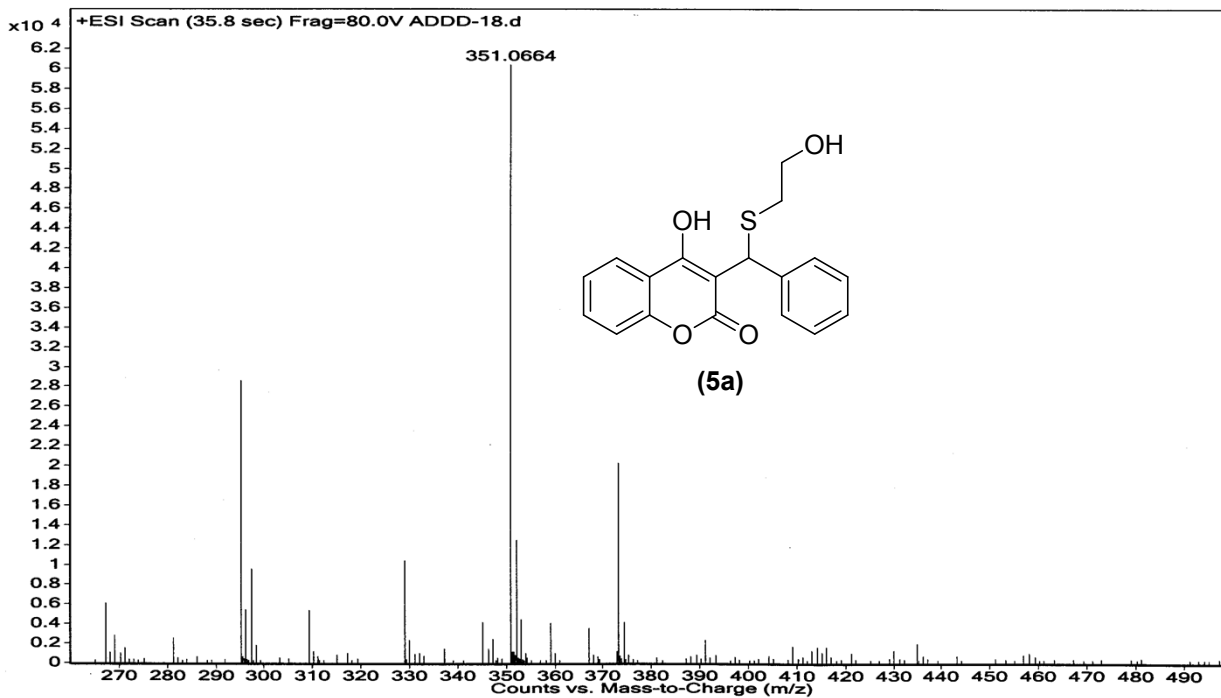

**HRMS (ESI) spectra : 4-hydroxy-3-(phenyl(phenylthio)methyl)-2H-chromen-2-one (6a)**

| Sample Name   | Position    | Instrument Name | User Name              |
|---------------|-------------|-----------------|------------------------|
| Inj Vol       | InjPosition | SampleType      | IRM Calibration Status |
| Data Filename | ACQ Method  | Comment         | Acquired Time          |

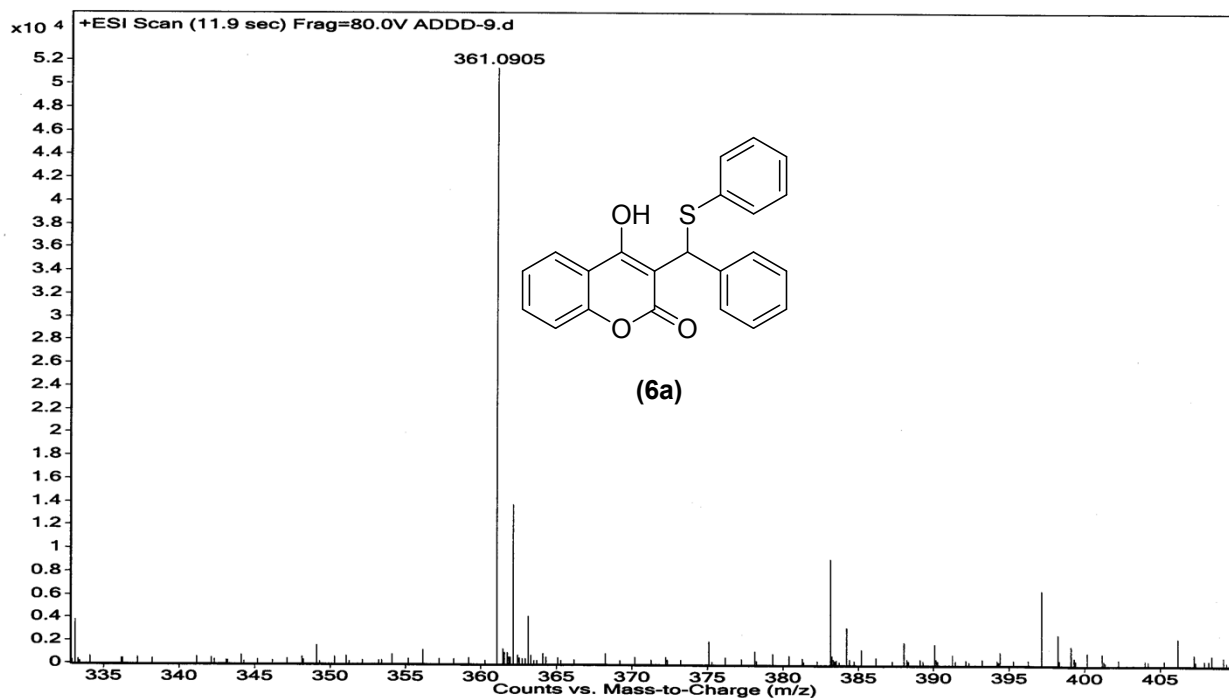

**HRMS (APCI) spectra : 4-hydroxy-3-(((4-methoxyphenyl)thio)(phenyl)methyl)-2H-chromen-2-one (7a)**

| Sample Name   | Position    | Instrument Name | User Name              |
|---------------|-------------|-----------------|------------------------|
| Inj Vol       | InjPosition | SampleType      | IRM Calibration Status |
| Data Filename | ACQ Method  | Comment         | Acquired Time          |

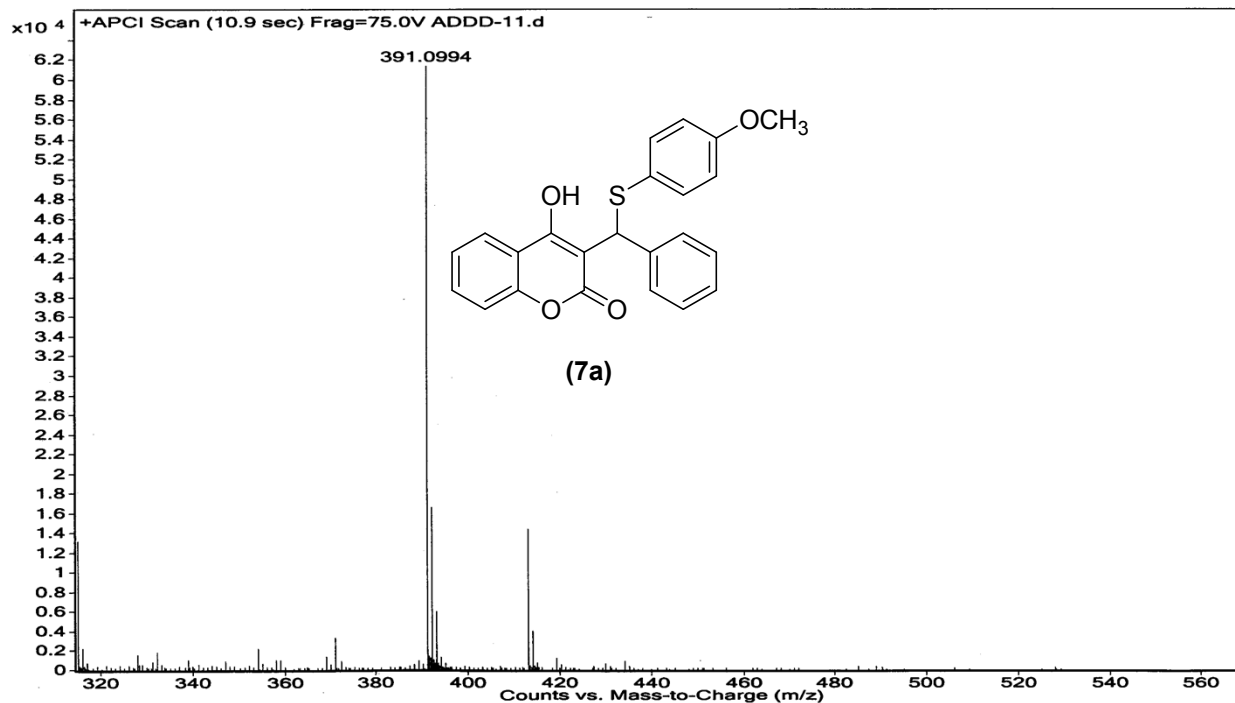

**HRMS (ESI) spectra : 3-(((4-chlorophenyl)thio)(phenyl)methyl)-4-hydroxy-2H-chromen-2-one (8a)**

| Sample Name   | Position    | Instrument Name | User Name              |
|---------------|-------------|-----------------|------------------------|
| Inj Vol       | InjPosition | SampleType      | IRM Calibration Status |
| Data Filename | ACQ Method  | Comment         | Acquired Time          |

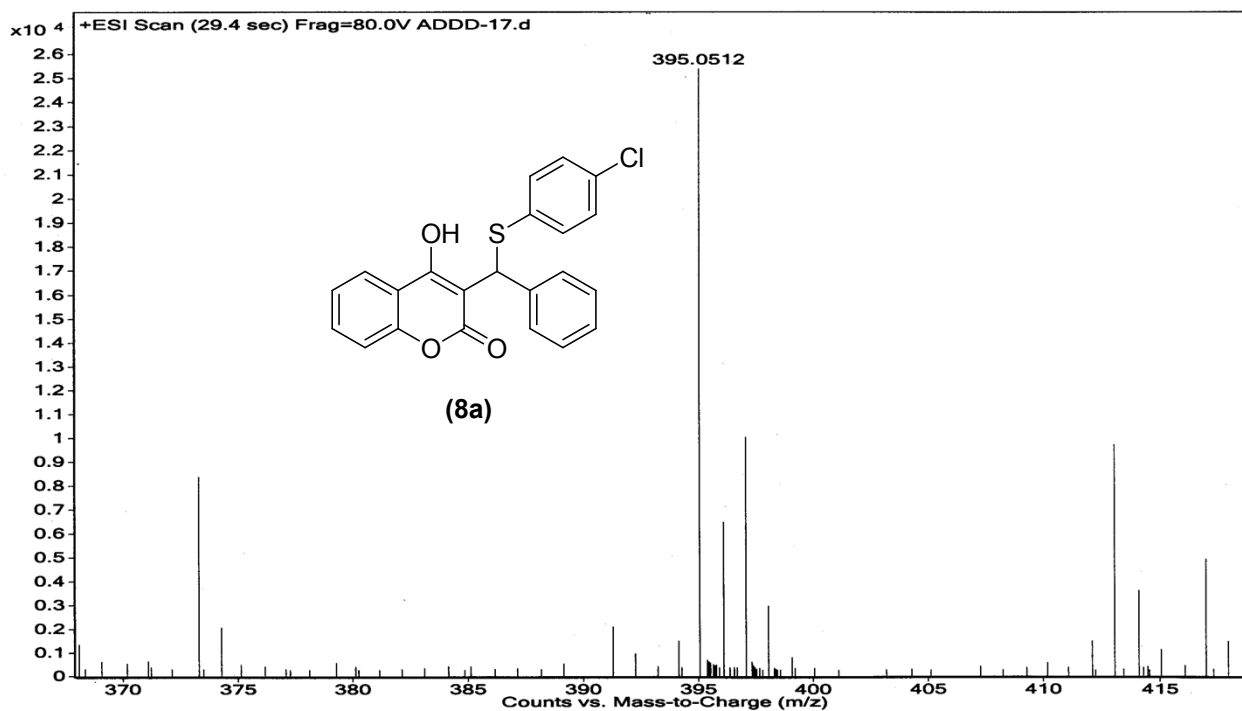

**HRMS (ESI) spectra : 3-(((2-chlorophenyl)thio)(phenyl)methyl)-4-hydroxy-2H-chromen-2-one (9a)**

| Sample Name   | Position    | Instrument Name | User Name              |
|---------------|-------------|-----------------|------------------------|
| Inj Vol       | InjPosition | SampleType      | IRM Calibration Status |
| Data Filename | ACQ Method  | Comment         | Acquired Time          |

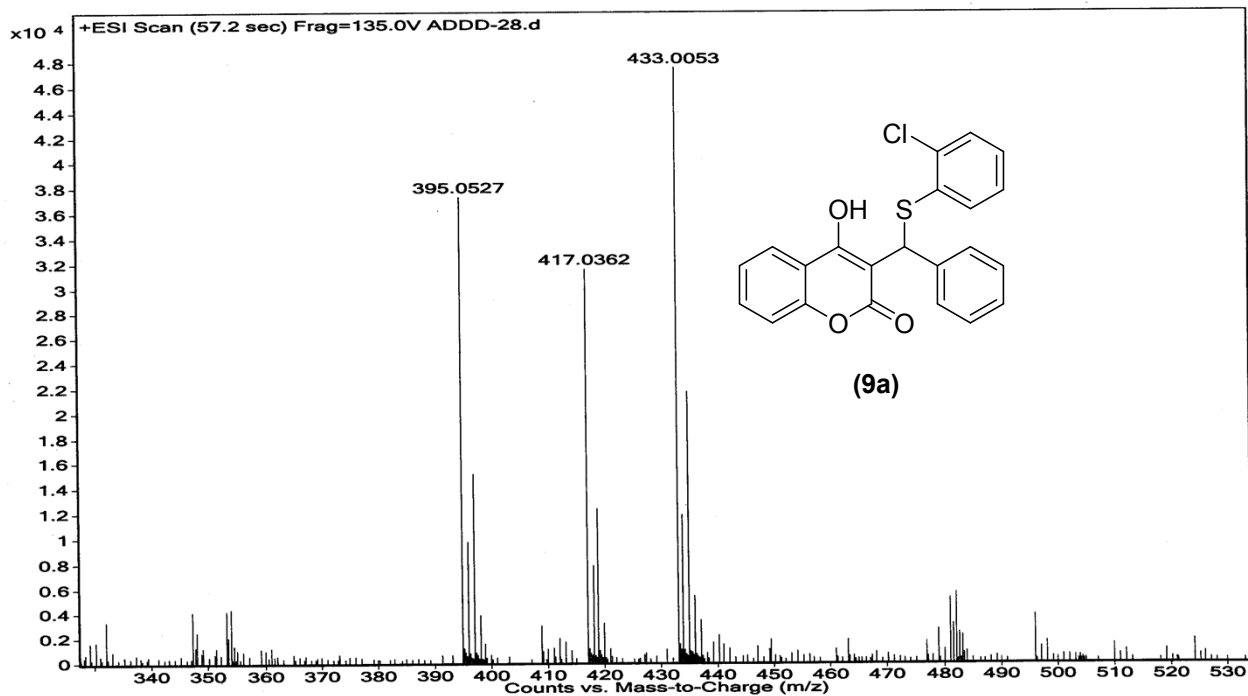

**HRMS (ESI) spectra : 3-(((2-bromophenyl)thio)(phenyl)methyl)-4-hydroxy-2H-chromen-2-one (10a)**

| Sample Name   | Position    | Instrument Name | User Name              |
|---------------|-------------|-----------------|------------------------|
| Inj Vol       | InjPosition | SampleType      | IRM Calibration Status |
| Data Filename | ACQ Method  | Comment         | Acquired Time          |

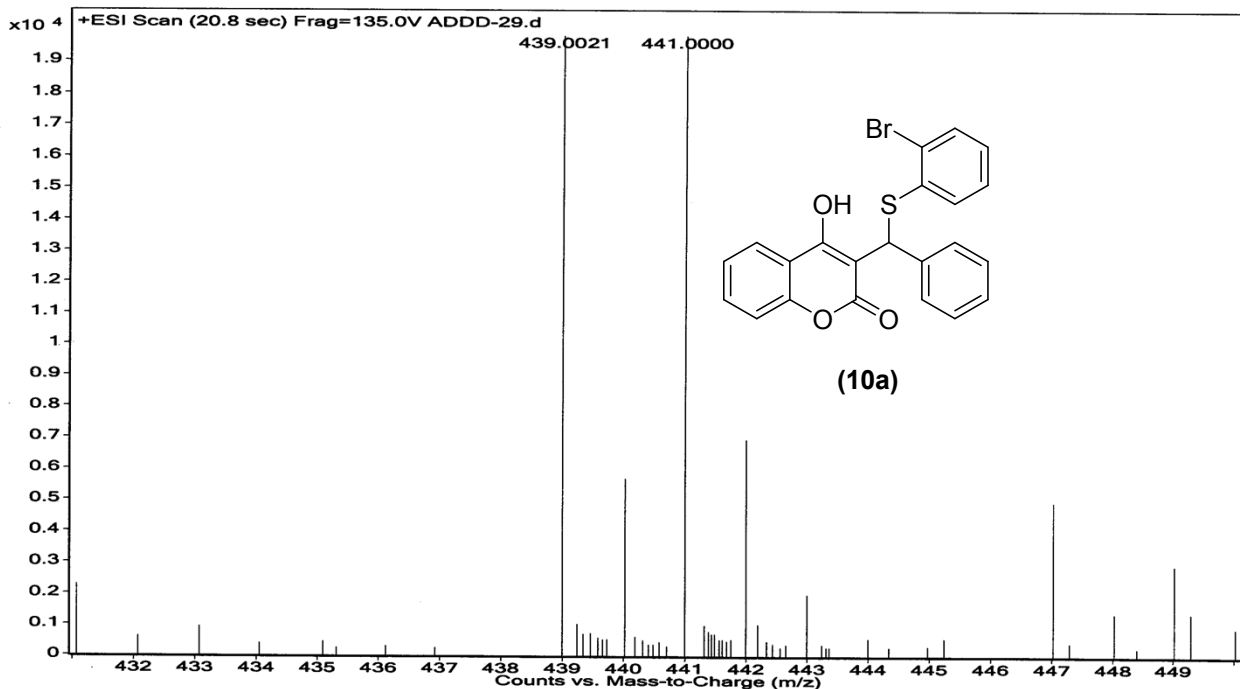

**HRMS (ESI) spectra : 4-hydroxy-3-((naphthalen-2-ylthio)(phenyl)methyl)-2H-chromen-2-one (11a)**

| Sample Name   | Position    | Instrument Name | User Name              |
|---------------|-------------|-----------------|------------------------|
| Inj Vol       | InjPosition | SampleType      | IRM Calibration Status |
| Data Filename | ACQ Method  | Comment         | Acquired Time          |

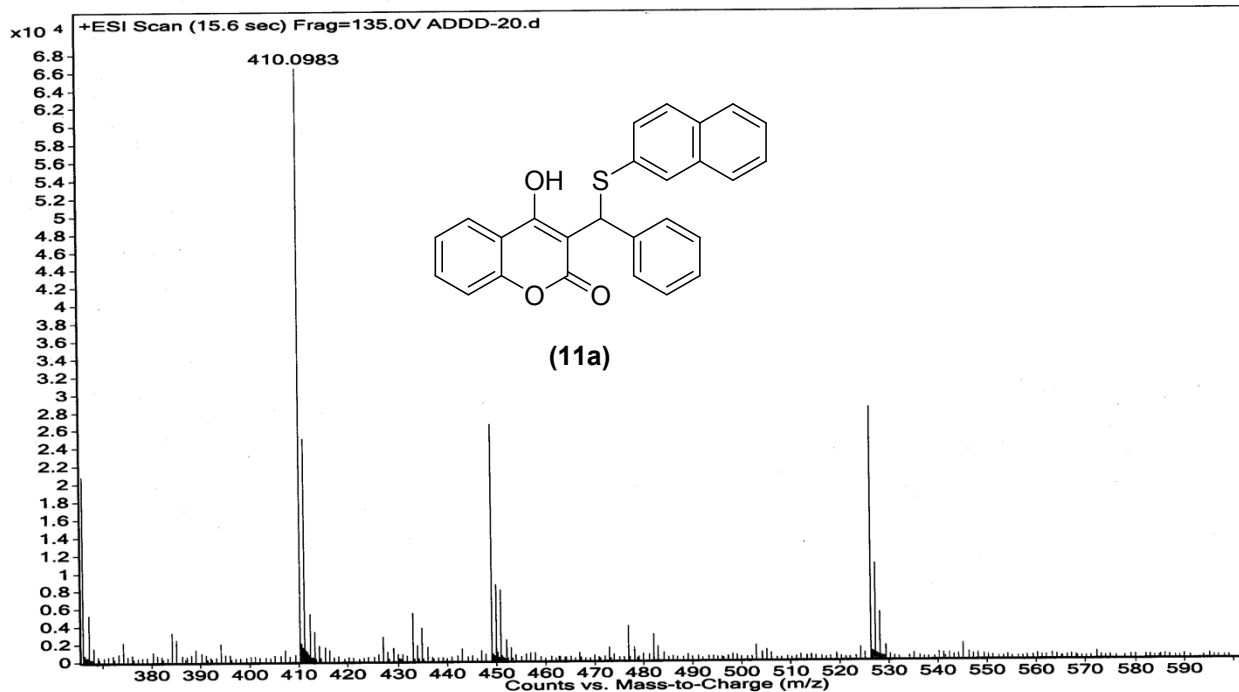

**HRMS (ESI) spectra: 4-hydroxy-3-((4-hydroxyphenyl)(phenylthio)methyl)-2H-chromen-2-one (12a)**

| Sample Name   | Position    | Instrument Name | User Name              |
|---------------|-------------|-----------------|------------------------|
| Inj Vol       | InjPosition | SampleType      | IRM Calibration Status |
| Data Filename | ACQ Method  | Comment         | Acquired Time          |

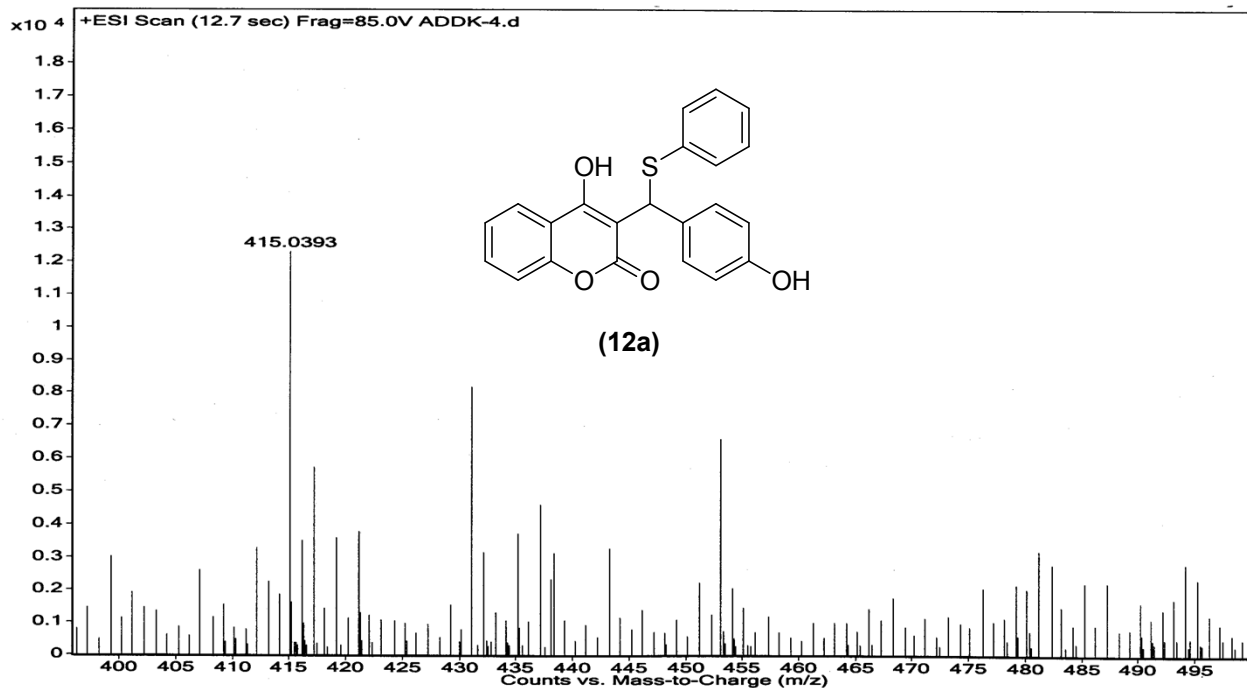

HRMS (ESI) spectra : 4-hydroxy-3-((phenylthio)(p-tolyl)methyl)-2H-chromen-2-one (13a)

| Sample Name   | Position    | Instrument Name | User Name              |
|---------------|-------------|-----------------|------------------------|
| Inj Vol       | InjPosition | SampleType      | IRM Calibration Status |
| Data Filename | ACQ Method  | Comment         | Acquired Time          |

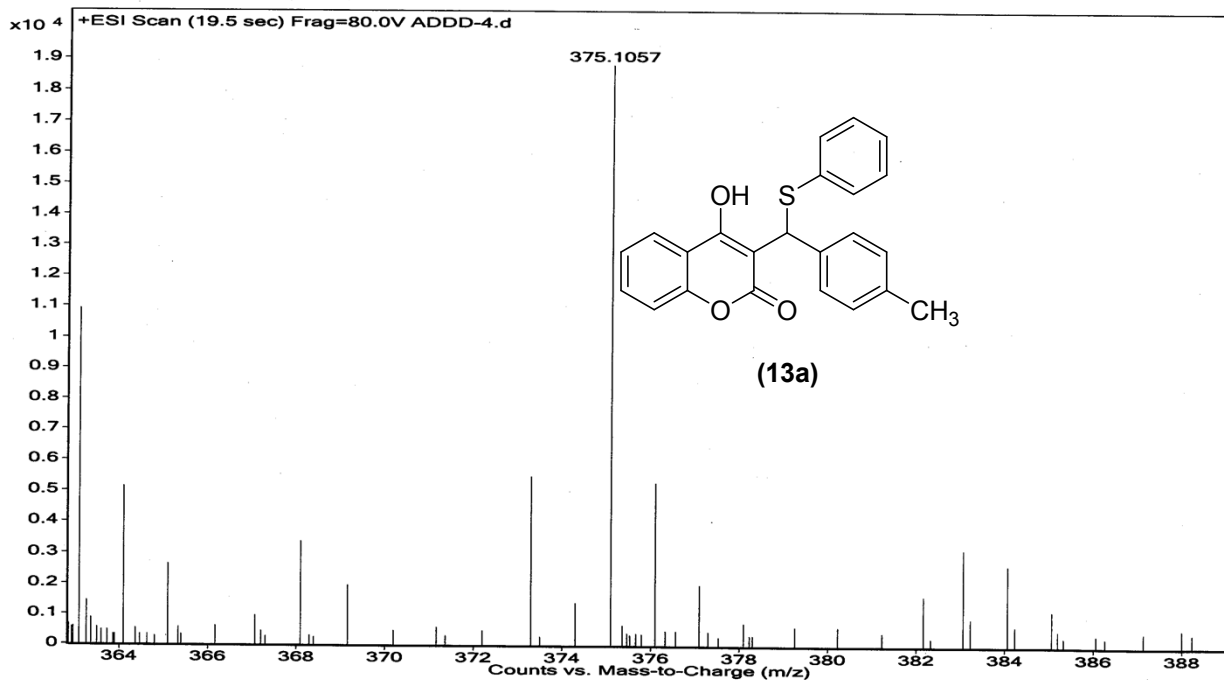

HRMS (ESI) spectra : 3-(cyclohexyl(phenylthio)methyl)-4-hydroxy-2H-chromen-2-one (14a)

| Sample Name   | Position    | Instrument Name | User Name              |
|---------------|-------------|-----------------|------------------------|
| Inj Vol       | InjPosition | SampleType      | IRM Calibration Status |
| Data Filename | ACQ Method  | Comment         | Acquired Time          |

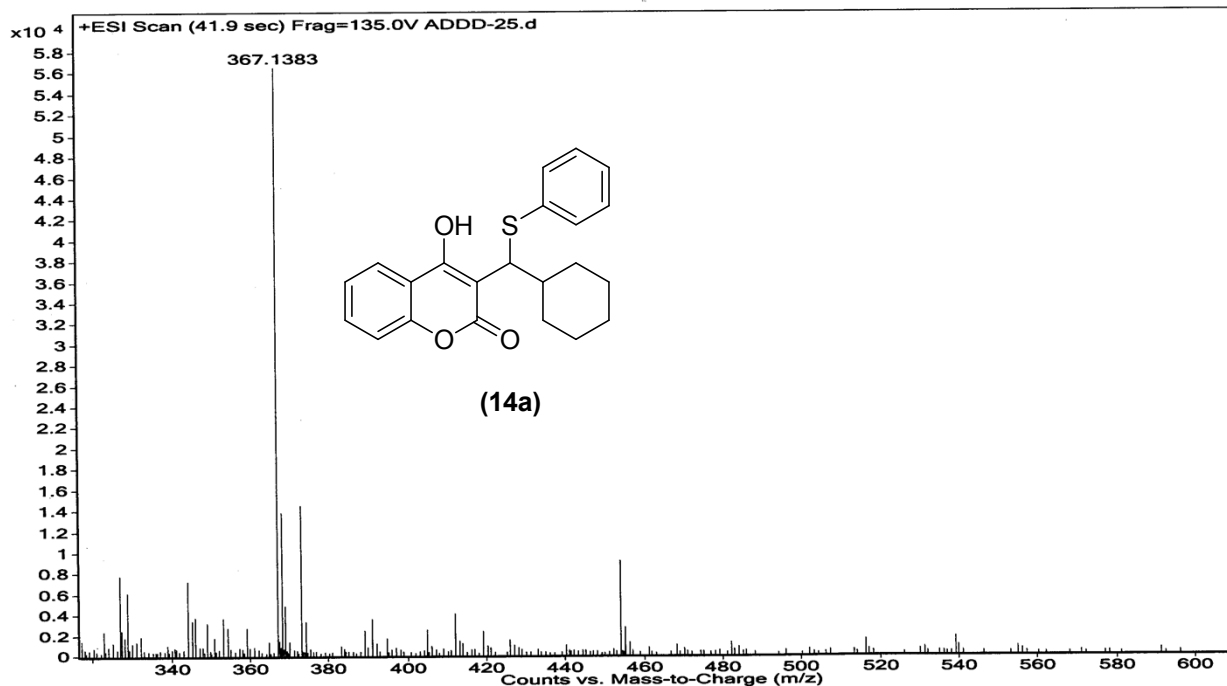

HRMS (ESI) spectra : (E)-4-hydroxy-3-(1-(phenylthio)but-2-en-1-yl)-2H-chromen-2-one (15a)

| Sample Name   | Position    | Instrument Name | User Name              |
|---------------|-------------|-----------------|------------------------|
| Inj Vol       | InjPosition | SampleType      | IRM Calibration Status |
| Data Filename | ACQ Method  | Comment         | Acquired Time          |

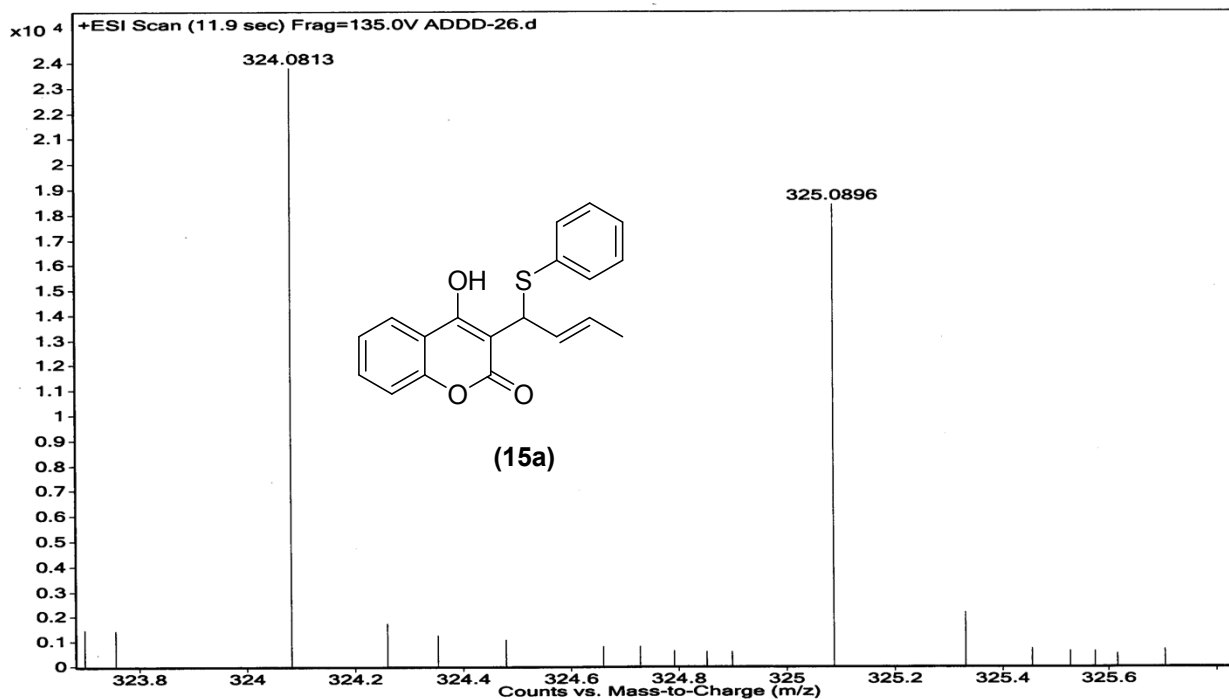

HRMS (APCI) spectra : 4-hydroxy-3-(phenyl(p-tolylthio)methyl)-2H-chromen-2-one (16a)

| Sample Name   | Position    | Instrument Name | User Name              |
|---------------|-------------|-----------------|------------------------|
| Inj Vol       | InjPosition | SampleType      | IRM Calibration Status |
| Data Filename | ACQ Method  | Comment         | Acquired Time          |

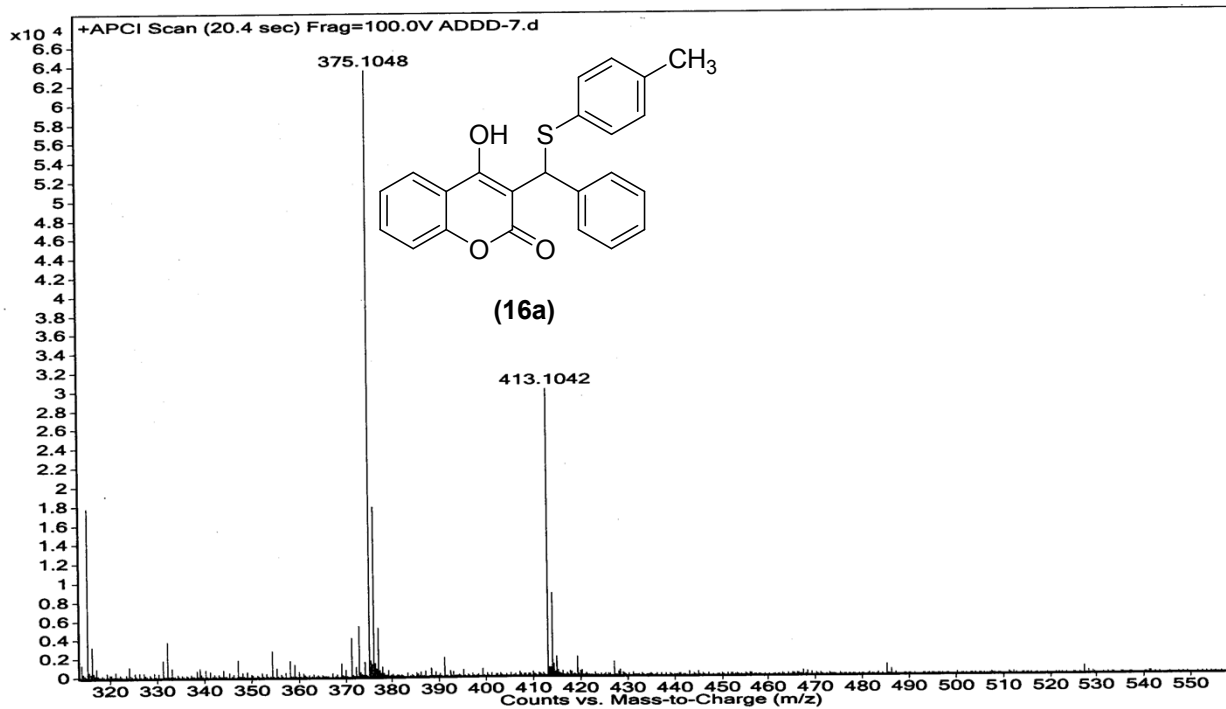

APCI-HRMS spectra : 4-hydroxy-3-((4-hydroxyphenyl)(p-tolylthio)methyl)-2H-chromen-2-one (17a)

| Sample Name   | Position    | Instrument Name | User Name              |
|---------------|-------------|-----------------|------------------------|
| Inj Vol       | InjPosition | SampleType      | IRM Calibration Status |
| Data Filename | ACQ Method  | Comment         | Acquired Time          |

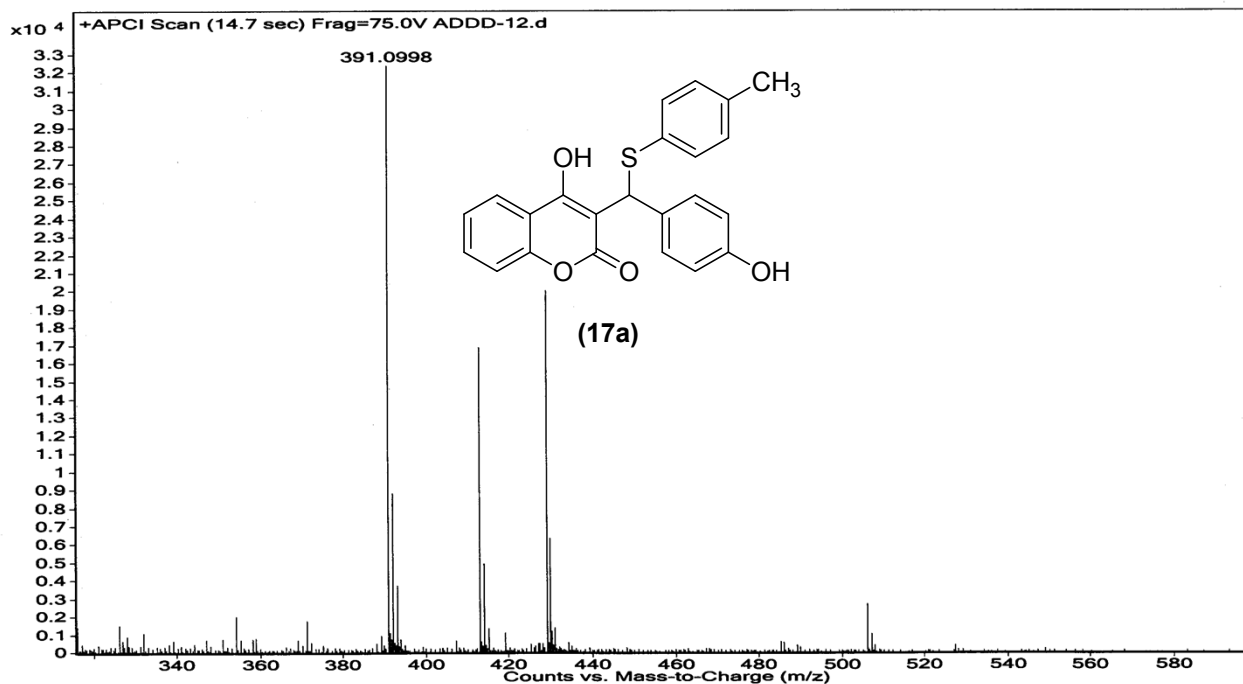

HRMS (APCI) spectra : 4-hydroxy-3-((4-methoxyphenyl)(p-tolylthio)methyl)-2H-chromen-2-one (18a)

| Sample Name   | Position    | Instrument Name | User Name              |
|---------------|-------------|-----------------|------------------------|
| Inj Vol       | InjPosition | SampleType      | IRM Calibration Status |
| Data Filename | ACQ Method  | Comment         | Acquired Time          |

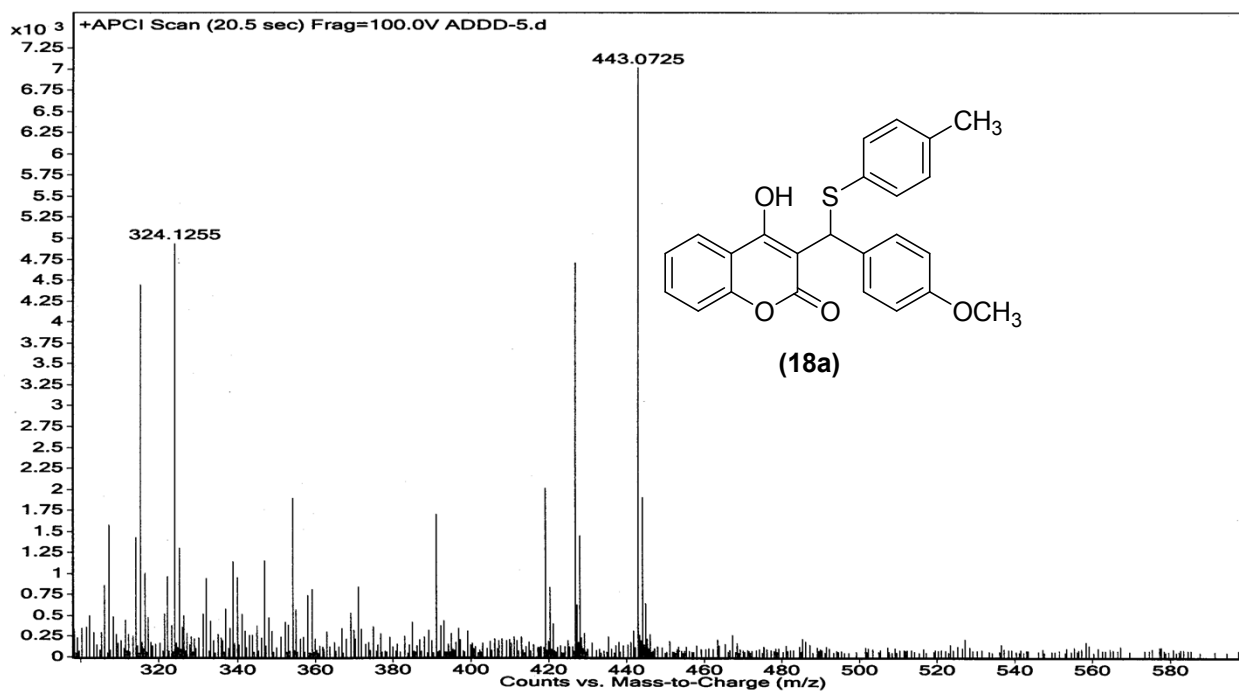

HRMS (APCI) spectra : 3-((4-chlorophenyl)(p-tolylthio)methyl)-4-hydroxy-2H-chromen-2-one (19a)

| Sample Name   | Position    | Instrument Name | User Name              |
|---------------|-------------|-----------------|------------------------|
| Inj Vol       | InjPosition | SampleType      | IRM Calibration Status |
| Data Filename | ACQ Method  | Comment         | Acquired Time          |

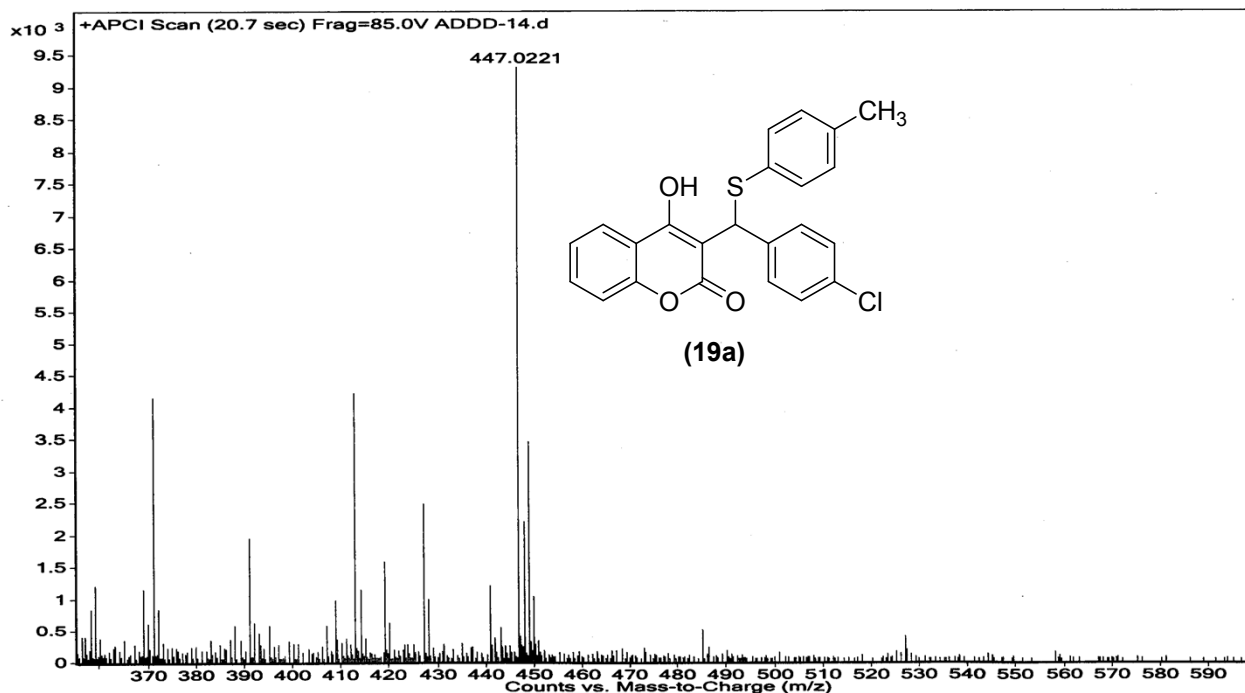

HRMS (ESI) spectra : 3-((4-bromophenyl)(p-tolylthio)methyl)-4-hydroxy-2H-chromen-2-one (20a)

| Sample Name   | Position    | Instrument Name | User Name              |
|---------------|-------------|-----------------|------------------------|
| Inj Vol       | InjPosition | SampleType      | IRM Calibration Status |
| Data Filename | ACQ Method  | Comment         | Acquired Time          |

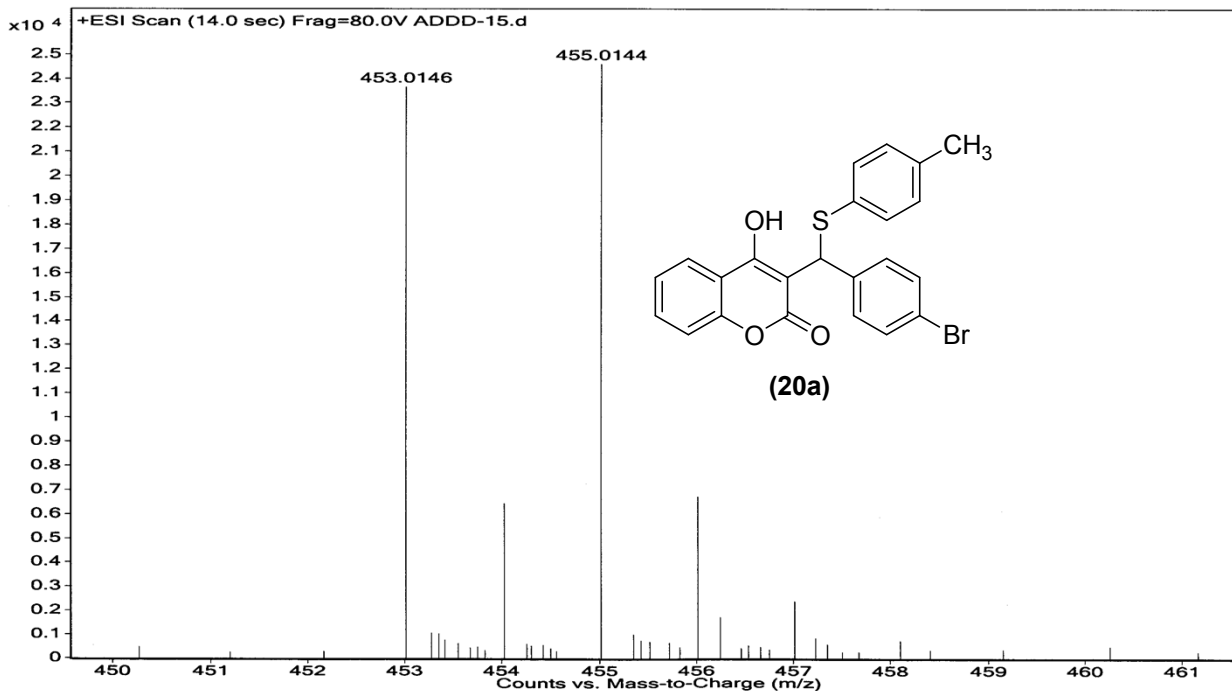



HRMS (APCI) spectra : 3-((4-fluorophenyl)(p-tolylthio)methyl)-4-hydroxy-2H-chromen-2-one (21a)

| Sample Name   | Position    | Instrument Name | User Name              |
|---------------|-------------|-----------------|------------------------|
| Inj Vol       | InjPosition | SampleType      | IRM Calibration Status |
| Data Filename | ACQ Method  | Comment         | Acquired Time          |

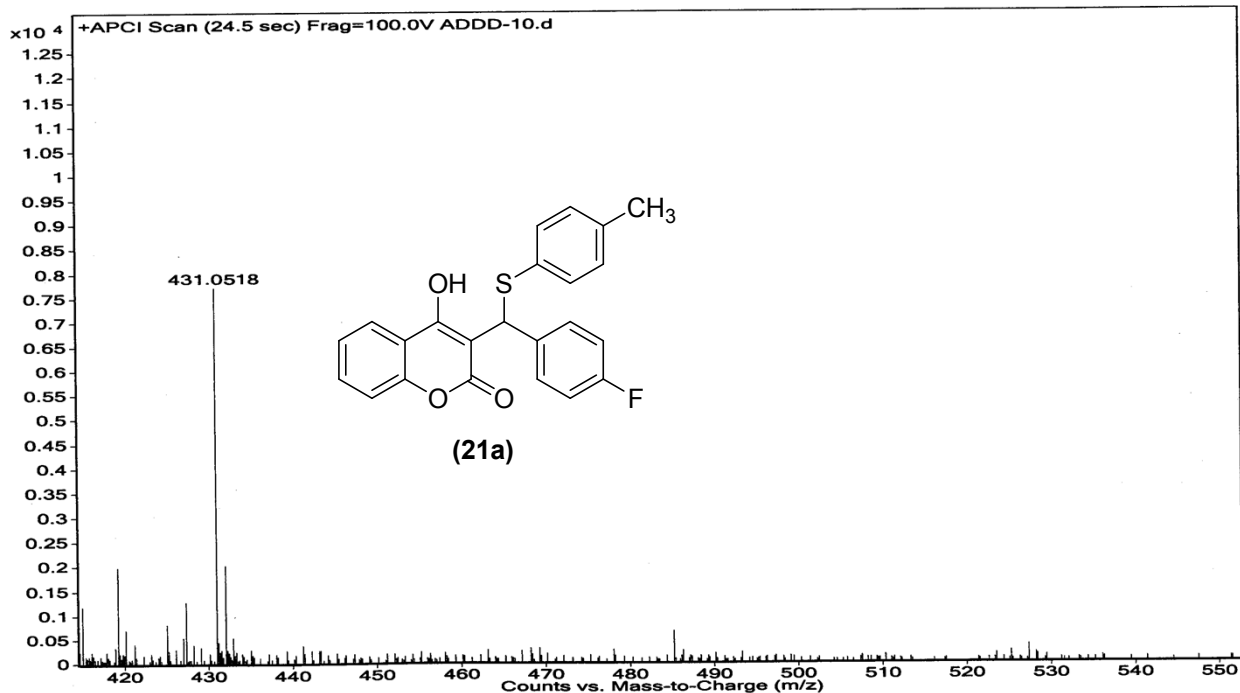

HRMS (APCI) spectra : 4-hydroxy-3-((4-nitrophenyl)(p-tolylthio)methyl)-2H-chromen-2-one (22a)

| Sample Name   | Position    | Instrument Name | User Name              |
|---------------|-------------|-----------------|------------------------|
| Inj Vol       | InjPosition | SampleType      | IRM Calibration Status |
| Data Filename | ACQ Method  | Comment         | Acquired Time          |

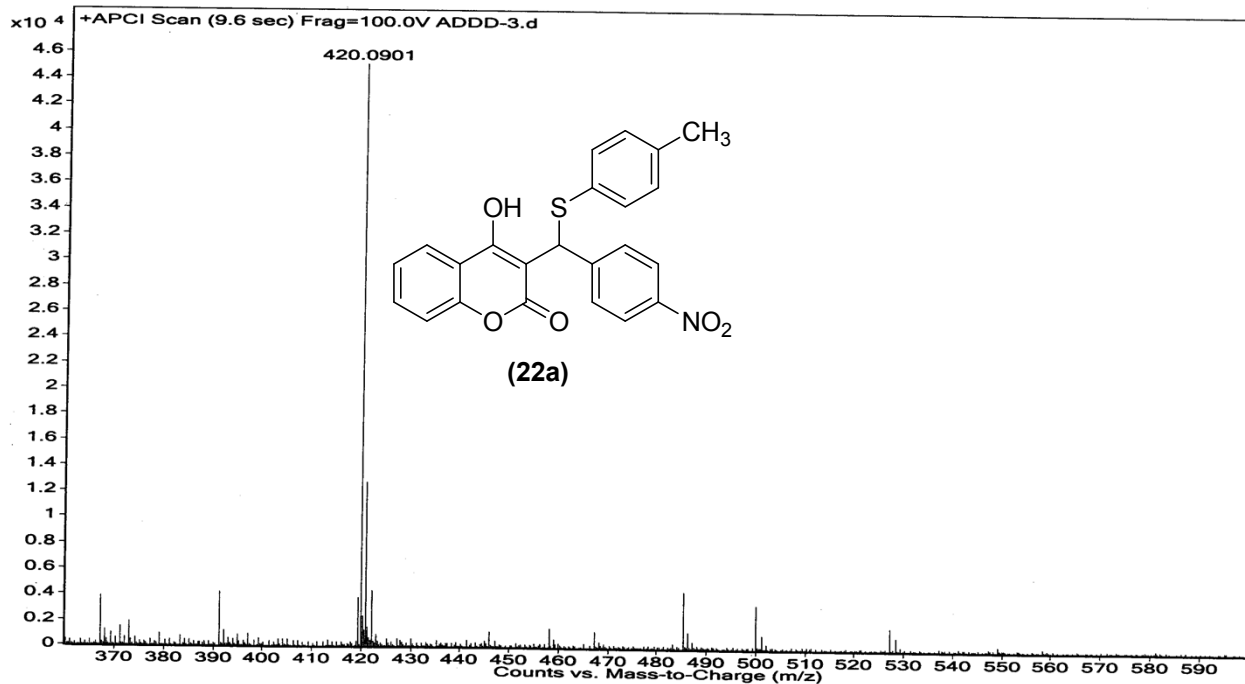

HRMS (ESI) spectra : 3-((2-chlorophenyl)(p-tolylthio)methyl)-4-hydroxy-2H-chromen-2-one (23a)

| Sample Name   | Position    | Instrument Name | User Name              |
|---------------|-------------|-----------------|------------------------|
| Inj Vol       | InjPosition | SampleType      | IRM Calibration Status |
| Data Filename | ACQ Method  | Comment         | Acquired Time          |

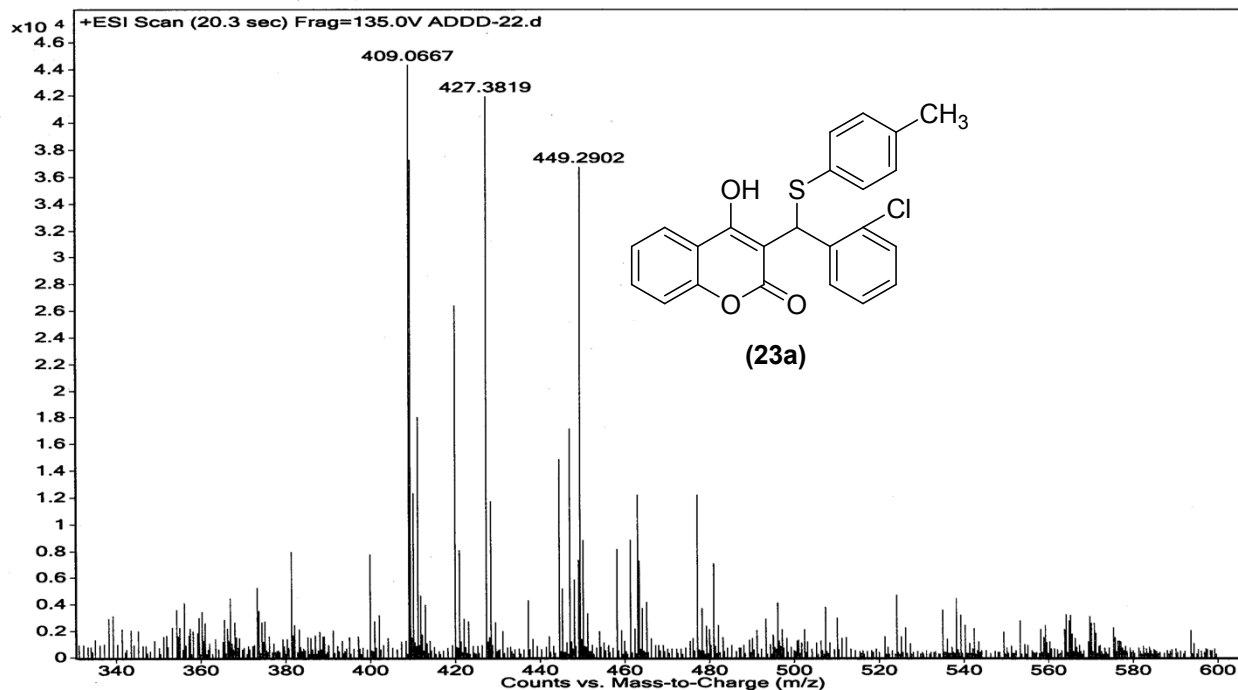

HRMS (ESI) spectra : 4-hydroxy-3-((2-nitrophenyl)(p-tolylthio)methyl)-2H-chromen-2-one (24a)

| Sample Name   | Position    | Instrument Name | User Name              |
|---------------|-------------|-----------------|------------------------|
| Inj Vol       | InjPosition | SampleType      | IRM Calibration Status |
| Data Filename | ACQ Method  | Comment         | Acquired Time          |

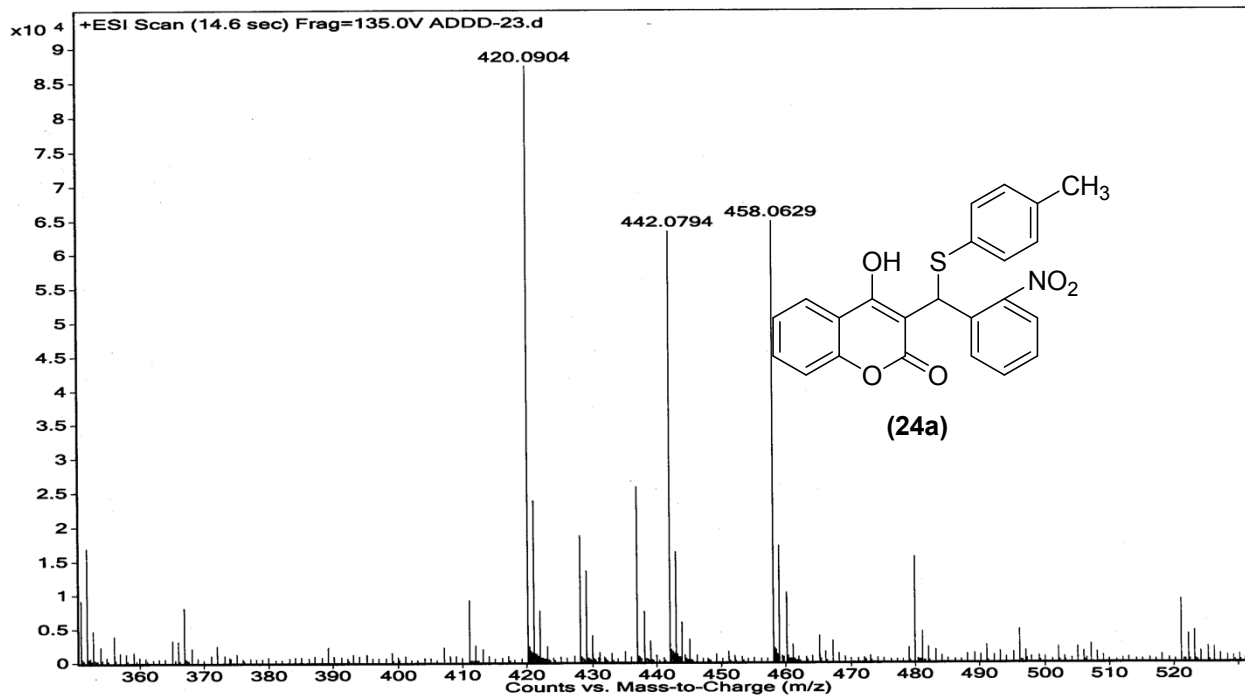

**HRMS (ESI) spectra : 3-((2,4-dimethoxyphenyl)(p-tolylthio)methyl)-4-hydroxy-2H-chromen-2-one (25a)**

| Sample Name<br>Inj Vol<br>Data Filename | Position<br>InjPosition<br>ACQ Method | Instrument Name<br>SampleType<br>Comment | User Name<br>IRM Calibration Status<br>Acquired Time |
|-----------------------------------------|---------------------------------------|------------------------------------------|------------------------------------------------------|
|-----------------------------------------|---------------------------------------|------------------------------------------|------------------------------------------------------|

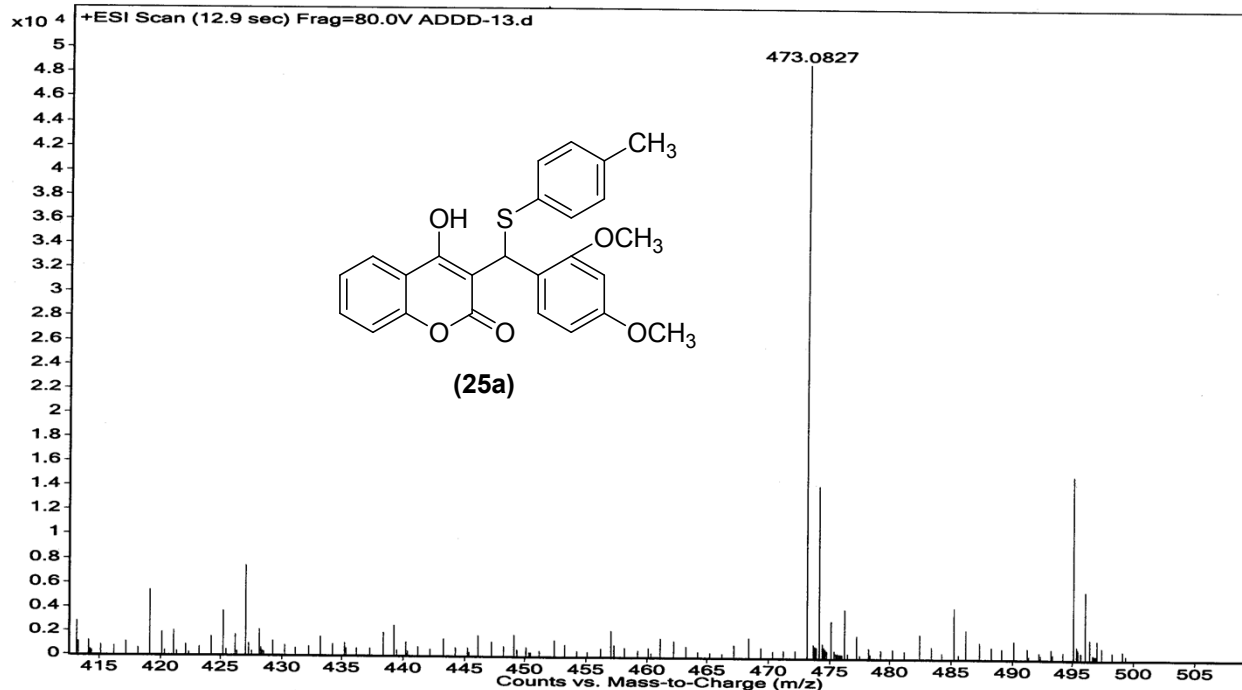

**HRMS (APCI) spectra : 4-hydroxy-3-(naphthalen-2-yl(p-tolylthio)methyl)-2H-chromen-2-one (26a)**

| Sample Name<br>Inj Vol<br>Data Filename | Position<br>InjPosition<br>ACQ Method | Instrument Name<br>SampleType<br>Comment | User Name<br>IRM Calibration Status<br>Acquired Time |
|-----------------------------------------|---------------------------------------|------------------------------------------|------------------------------------------------------|
|-----------------------------------------|---------------------------------------|------------------------------------------|------------------------------------------------------|

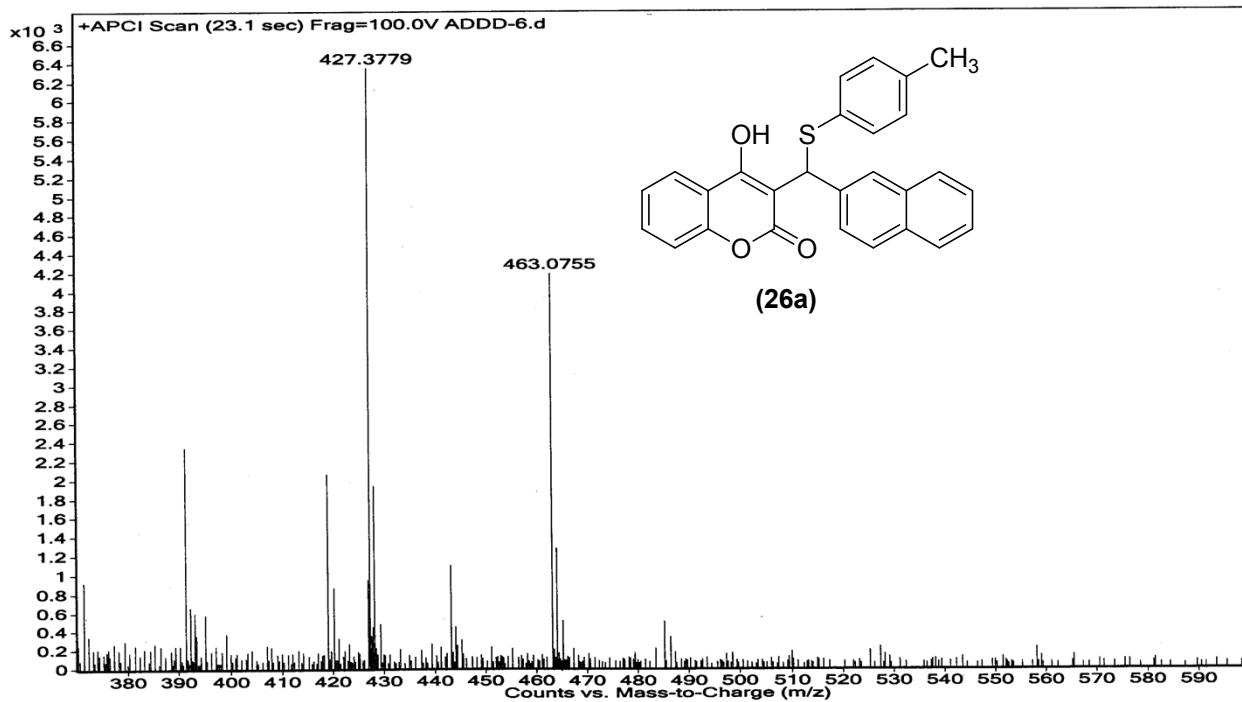

*HRMS (ESI) spectra : 3-(((4-bromophenyl)thio)(4-methoxyphenyl)methyl)-4-hydroxy-2H-chromen-2-one (27a)*

| Sample Name   | Position    | Instrument Name | User Name              |
|---------------|-------------|-----------------|------------------------|
| Inj Vol       | InjPosition | SampleType      | IRM Calibration Status |
| Data Filename | ACQ Method  | Comment         | Acquired Time          |

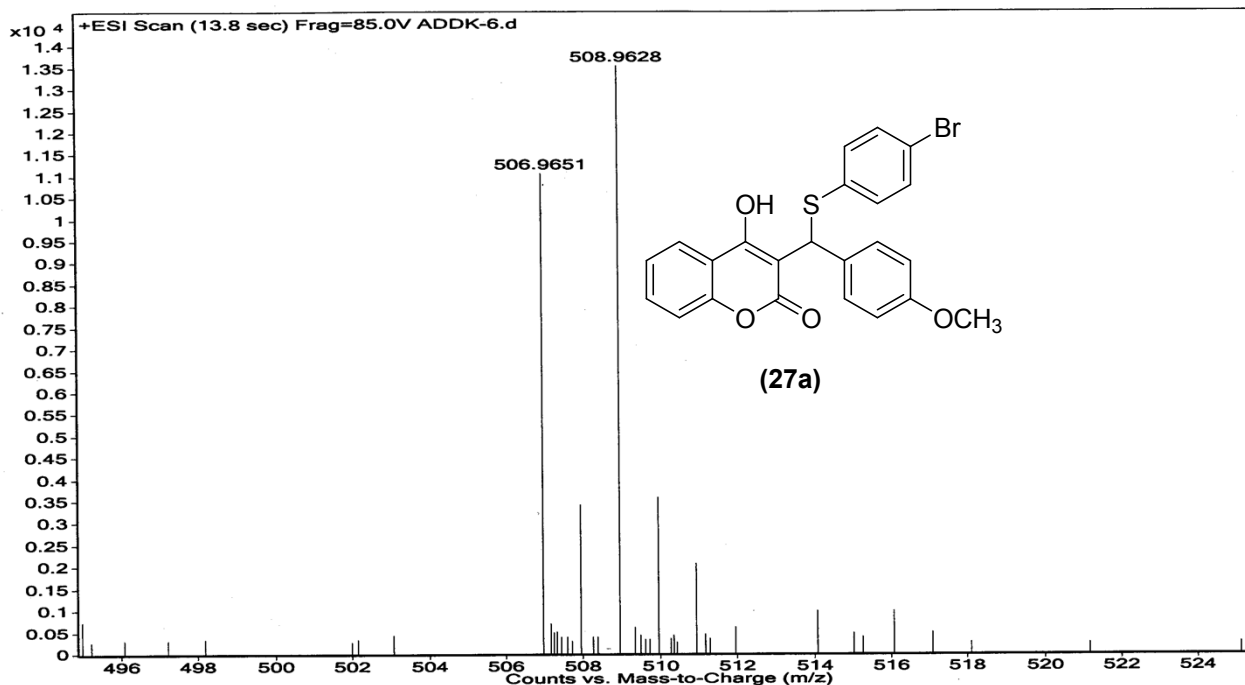

*HRMS (ESI) spectra : 4-(((4-chlorophenyl)thio)(4-hydroxy-2-oxo-2H-chromen-3-yl)methyl)benzonitrile (28a)*

| Sample Name   | Position    | Instrument Name | User Name              |
|---------------|-------------|-----------------|------------------------|
| Inj Vol       | InjPosition | SampleType      | IRM Calibration Status |
| Data Filename | ACQ Method  | Comment         | Acquired Time          |

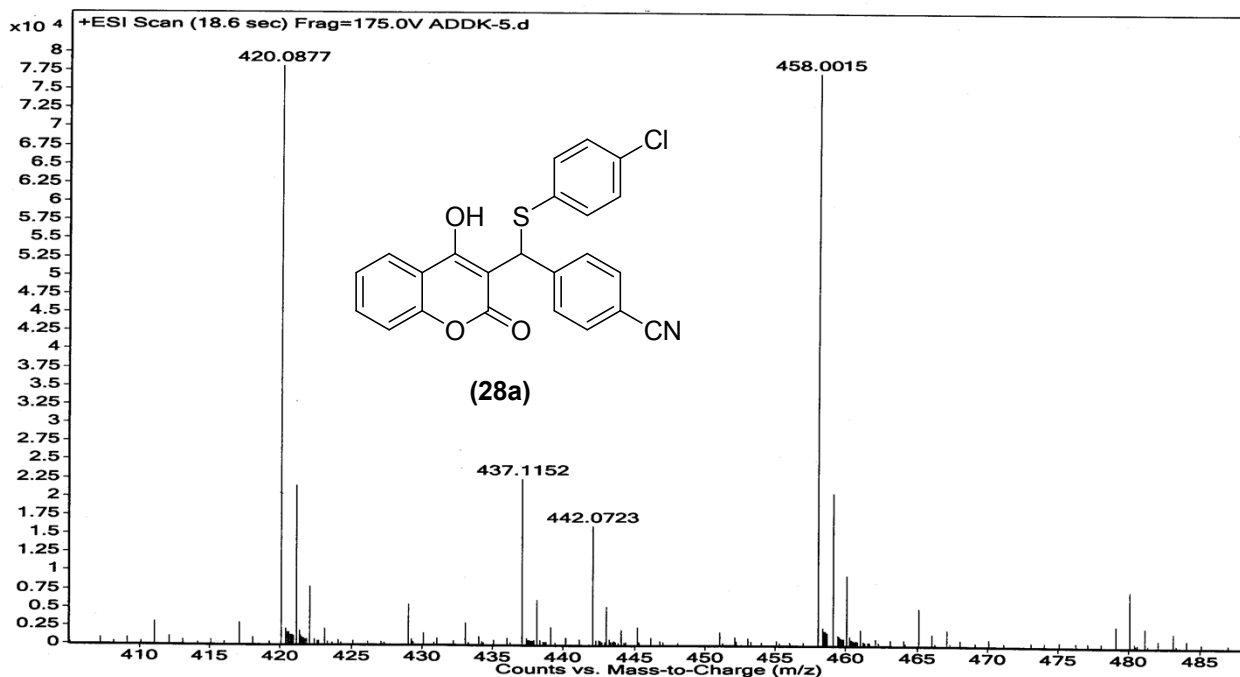

HRMS (ESI) spectra : 3-((benzylthio)(thiophen-2-yl)methyl)-4-hydroxy-2H-chromen-2-one (29a)

| Sample Name   | Position    | Instrument Name | User Name              |
|---------------|-------------|-----------------|------------------------|
| Inj Vol       | InjPosition | SampleType      | IRM Calibration Status |
| Data Filename | ACQ Method  | Comment         | Acquired Time          |

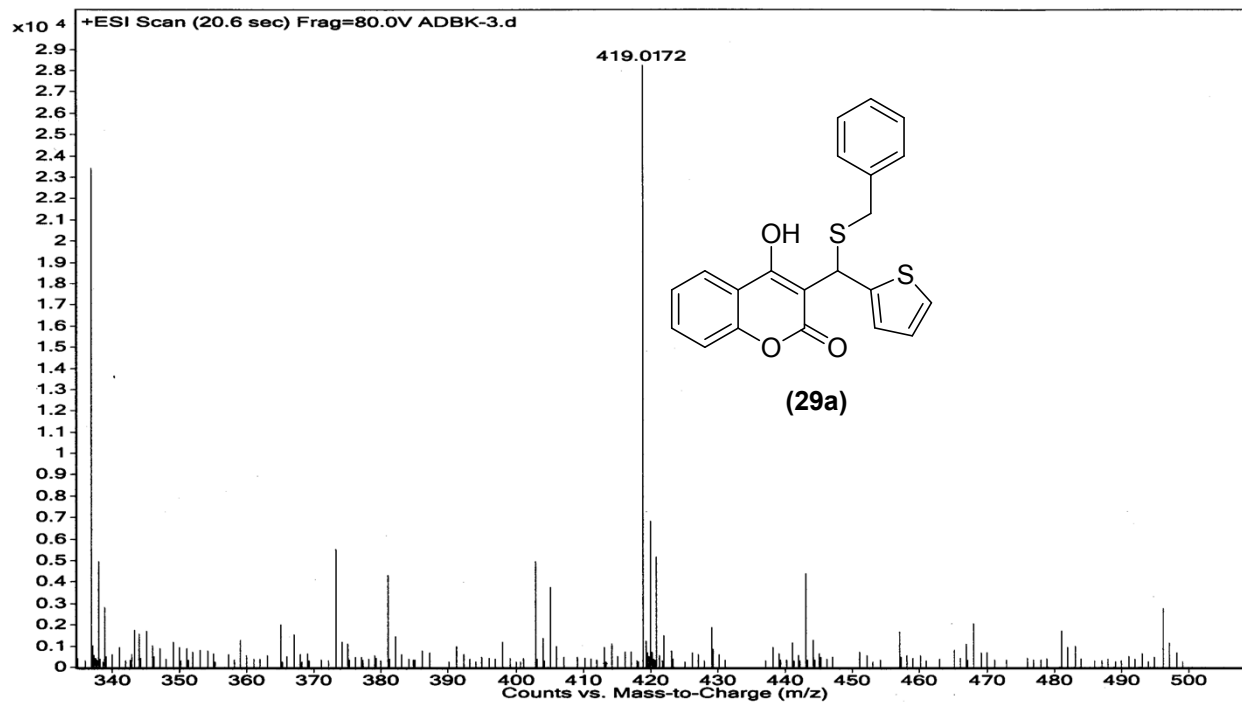

HRMS (ESI) spectra : 3-((ethylthio)(pyridin-2-yl)methyl)-4-hydroxy-2H-chromen-2-one (30a)

| Sample Name   | Position    | Instrument Name | User Name              |
|---------------|-------------|-----------------|------------------------|
| Inj Vol       | InjPosition | SampleType      | IRM Calibration Status |
| Data Filename | ACQ Method  | Comment         | Acquired Time          |

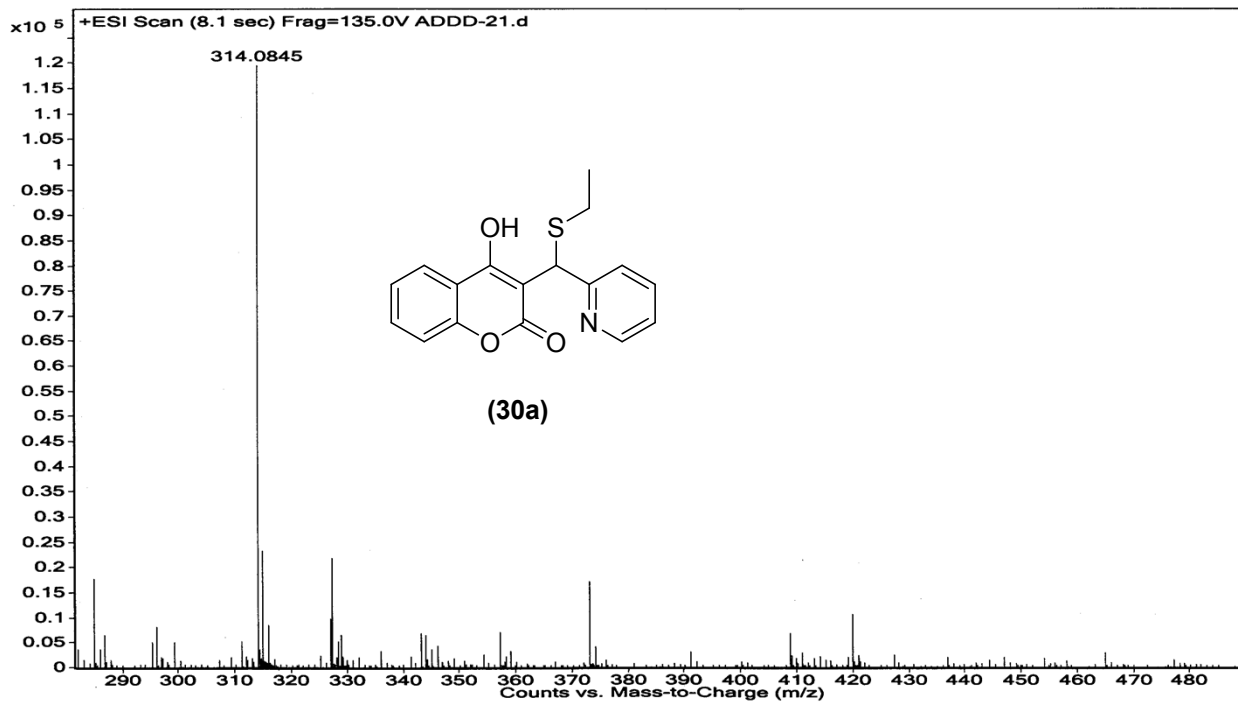

Supplement: c5ra09152g1.pdf [file c5ra09152g1.pdf]
